# Supplementary material
Source: PubMed Central journal article supplement (PMC4007975)

# Supporting Information

## Evaluation of Diarylureas for Activity Against *Plasmodium falciparum*: search for new pharmacophores

Yiqun Zhang,<sup>1</sup> Marc Anderson,<sup>2</sup> Jennifer L. Weisman,<sup>3,4</sup> Min Lu,<sup>1</sup> Cindy J. Choy,<sup>5</sup> Vincent A. Boyd,<sup>1</sup> Jeanine Price,<sup>1</sup> Martina Sigal,<sup>1</sup> Julie Clark,<sup>1</sup> Michele Connelly,<sup>1</sup> Fangyi Zhu,<sup>1</sup> W. Armand Guiguemde,<sup>1</sup> Cynthia Jeffries,<sup>1</sup> Lei Yang,<sup>1</sup> Andrew Lemoff,<sup>1</sup> Ally P. Liou,<sup>3</sup> Thomas R. Webb,<sup>1</sup> Joseph L. DeRisi,<sup>3</sup> and R. Kiplin Guy<sup>1,\*</sup>

<sup>1</sup> Chemical Biology & Therapeutics Department, St Jude Children's Research Hospital, 262 Danny Thomas Place, Memphis, TN 38105

<sup>2</sup> Department of chemistry and Biochemistry, San Francisco State University, San Francisco, CA 94132-4163

<sup>3</sup> Department of Biochemistry and Biophysics, University of California, San Francisco, CA 94143-2280

<sup>4</sup> Department of Cellular and Molecular Pharmacology, University of California, San Francisco, CA 94143-2280

<sup>5</sup> Department of Chemistry, Washington State University, Pullman, WA 99164-4630

## Table of Contents

|                                                                                                        |     |
|--------------------------------------------------------------------------------------------------------|-----|
| General Consideration.....                                                                             | S2  |
| General Synthesis Procedure for diarylureas <b>4</b> {x,y}.....                                        | S2  |
| Generation of aryl isocyanate .....                                                                    | S2  |
| Biological Assay .....                                                                                 | S4  |
| Cytotoxicity assays .....                                                                              | S5  |
| PAMPA permeability assays .....                                                                        | S5  |
| Solubility assays .....                                                                                | S5  |
| Kinase assays (KINOMEscan <sup>TM</sup> , Ambit Biosciences).....                                      | S5  |
| Pharmacophore generation for compounds <b>4</b> {13,1}, <b>4</b> {13,39} and <b>4</b> {13,58}.....     | S6  |
| <b>Table 1.</b> LC/MS characterization of diarylureas <b>4</b> {x,y}.....                              | S7  |
| <b>Table 2.</b> Summary of diarylureas <b>4</b> {1-20, 1-9}.....                                       | S12 |
| <b>Table 3.</b> Summary of 4-aminoquinaldine-derived diarylureas <b>4</b> {13, 1-60}.....              | S15 |
| <b>Table 4.</b> Inhibition summary of diarylurea <b>4</b> {13, 34} in competition kinase binding assay | S17 |
| <b>Figure 1.</b> Pharmacophore mapping of <b>4</b> {13, 1}, <b>4</b> {13, 39} and <b>4</b> {13, 58}.   | S21 |
| <b>Figure 2.</b> Treospot <sup>TM</sup> interaction maps for <b>4</b> {13, 34} in human kinases.       | S22 |
| References .....                                                                                       | S22 |
| Spectral and Chromatographic Data .....                                                                | S23 |

**General Consideration.** All materials were obtained from commercial suppliers and used without further purification. Thin layer chromatography was performed using silica gel 60 F254 plate from EMD. Preparative RP-HPLC was carried out on a four-channel Biotage Parallel Flex system with xBridge Prep. C18 OBD 5  $\mu\text{m}$  (19  $\times$  50 mm), or an Dionex APS 4000 LC/MS Prep. System with Gemini C18 OBD 5  $\mu\text{m}$  (30  $\times$  50 mm).  $^1\text{H}$  NMR spectra were recorded on a Bruker 400 MHz, chemical shifts were expressed in ppm relative to TMS used as an internal standard. The identification and purity of each compound was estimated by chromatographic methods using an HPLC-MS (photodiode array, total ion count, and expected mass [m/z]) was obtained (Alliance HT, Micromass ZQ 4000 and RP-C18 Xterra column 5  $\mu\text{m}$ , 6 mm  $\times$  50 mm [Waters]) or UPLC-MS (Acquity PDA detector, Acquity SQ detector and Acquity UPLC BEH-C18 column 1.7  $\mu\text{m}$ , 2.1  $\times$  50 mm [Waters]). Compounds prepared in our laboratory were over 90% purity. Novel compounds, which were not reported in literatures, were characterized by  $^1\text{H}$  NMR and LCMS.

**General Synthesis Procedure for diarylureas 4{x,y}.** Diarylureas 4{x,y} were synthesized according to the published procedure.<sup>1</sup> Aryl amines 1{x} (0.2 M) and aryl isocyanates 2{y} (0.2 M) were freshly prepared in anhydrous DMSO and stored over 4 $\text{\AA}$  molecular sieves and used quickly afterwards. To a 96-well polypropylene deep well plate (1.8 mL), was added the aryl amines (0.26 mL, 0.2 M in DMSO, 0.052 mmol) followed by the appropriate isocyanate (0.2 mL, 0.2 M in DMSO, 0.04 mmol). The reaction block was covered with aluminum foil and shaken upright on the Lab-line Multi-purpose Rotator for 5 min. Release of gas was observed in the reaction. The crude reaction mixtures were transferred into a Thomason 96 well filter plate, containing a small amount of packed Celite 545, and filtered into a Waters 96 well collection plate. Approximately 500  $\mu\text{L}$  of DMSO was added to each well to rinse the filter plate to make the final volume  $\sim$  1 mL for purification on preparative RP-HPLC. Dionex APS 4000 LC/MS Prep. System with Gemini C18 OBD 5  $\mu\text{m}$  (30  $\times$  50 mm) was used for purification were with 4% THF/MeOH+0.1% formic acid as solvent B and H<sub>2</sub>O+0.1% formic acid as solvent A. An alternative RP-HPLC was a four-channel Biotage Parallel Flex system with xBridge Prep. C18 OBD 5  $\mu\text{m}$  (19  $\times$  50 mm), eluting with MeOH+0.1% formic acid (solvent B) and H<sub>2</sub>O+0.1% formic acid (solvent A).

**Generation of aryl isocyanate.** A solution of aryl amine (1.2 mmol) in DMSO (5.5 mL) was treated with 1,1'-carbonyldiimidazole (1.4 mmol). The mixture was stirred at room temperature for 2 h, and then used directly as a stock solution (0.2 M in DMSO) for synthesis of diarylureas using the procedure described above.

**1-(5-Chloro-2-methoxyphenyl)-3-(quinolin-5-yl)urea, 4{12,1}:**  $^1\text{H}$  NMR (400 MHz, DMSO)  $\delta$  9.40 (s, 1H), 8.94 (s, 1H), 8.29 (d,  $J$  = 2.6 Hz, 1H), 8.20 (d,  $J$  = 8.5 Hz, 1H), 8.01 (d,  $J$  = 7.6 Hz, 1H), 7.94 (d,  $J$  = 7.3 Hz, 1H), 7.65 (d,  $J$  = 8.2 Hz, 1H), 7.62 – 7.52 (m, 2H), 7.48 (t,  $J$  = 7.9 Hz, 1H), 7.06 (d,  $J$  = 8.8 Hz, 1H), 7.00 (dd,  $J$  = 8.7, 2.6 Hz, 1H), 3.93 (s, 3H).

**1-(3-Chloro-4-methylphenyl)-3-(quinolin-5-yl)urea, 4{12,2}:**  $^1\text{H}$  NMR (400 MHz, MeOD)  $\delta$  8.88 (dd,  $J$  = 4.3, 1.6 Hz, 1H), 8.56 (d,  $J$  = 5.5 Hz, 1H), 7.90 (dd,  $J$  = 15.7, 8.0 Hz, 2H), 7.81 – 7.75 (m, 1H), 7.65 (d,  $J$  = 2.0 Hz, 1H), 7.60 (dd,  $J$  = 8.6, 4.3 Hz, 1H), 7.27 – 7.19 (m, 2H), 2.33 (s, 3H).

**1-(3-Chloro-4-methoxyphenyl)-3-(quinolin-5-yl)urea, 4{12,3}:**  $^1\text{H}$  NMR (400 MHz, MeOD)  $\delta$  8.87 (d,  $J$  = 2.8 Hz, 1H), 8.55 (d,  $J$  = 8.5 Hz, 1H), 7.88 (dd,  $J$  = 12.0, 8.0 Hz, 2H), 7.79 – 7.72 (m, 1H), 7.59 (dd,  $J$  = 9.7, 3.4 Hz, 2H), 7.31 (dd,  $J$  = 8.9, 2.6 Hz, 1H), 3.86 (s, 3H).

**1-(4-Ethylphenyl)-3-(quinolin-5-yl)urea, 4{12,4}:**  $^1\text{H}$  NMR (400 MHz, MeOD)  $\delta$  8.86 (dd,  $J$  = 4.3, 1.5 Hz, 1H), 8.55 (d,  $J$  = 8.3 Hz, 1H), 7.91 (d,  $J$  = 7.5 Hz, 1H), 7.85 (d,  $J$  = 8.5 Hz, 1H), 7.81 – 7.71 (m, 1H), 7.58 (dd,  $J$  = 8.6, 4.3 Hz, 1H), 7.37 (d,  $J$  = 8.5 Hz, 2H), 7.15 (d,  $J$  = 8.5 Hz, 2H), 2.70 – 2.40 (m, 2H), 1.22 (t,  $J$  = 7.6 Hz, 3H).

**1-(3-Chlorophenyl)-3-(2-methylquinolin-4-yl)urea, 4{13,7}**:  $^1\text{H}$  NMR (400 MHz, MeOD)  $\delta$  8.50 (s, 1H), 8.28 (d,  $J = 8.5$  Hz, 1H), 7.98 – 7.89 (m, 2H), 7.78 – 7.71 (m, 2H), 7.34 (d,  $J = 8.3$  Hz, 1H), 7.28 (t,  $J = 8.0$  Hz, 1H), 7.07 (d,  $J = 7.8$  Hz, 1H), 2.78 (s, 3H).

**1-(4-Chloro-3-(trifluoromethyl)phenyl)-3-(2-methylquinolin-4-yl)urea, 4{13,12}**:  $^1\text{H}$  NMR (400 MHz, MeOD)  $\delta$  8.46 (s, 1H), 8.25 (m, 3H), 8.15 (d,  $J = 2.4$  Hz, 1H), 8.00 (d,  $J = 8.4$  Hz, 1H), 7.94 – 7.86 (m, 1H), 7.79 – 7.68 (m, 2H), 7.59 (d,  $J = 8.7$  Hz, 1H), 2.79 (s, 3H).

**1-(2-Methylquinolin-4-yl)-3-(m-tolyl)urea, 4{13,21}**:  $^1\text{H}$  NMR (400 MHz, MeOD)  $\delta$  8.35 (s, 1H), 8.18 (d,  $J = 8.5$  Hz, 1H), 7.94 (d,  $J = 8.5$  Hz, 1H), 7.82 (t,  $J = 7.7$  Hz, 1H), 7.70 – 7.61 (m, 1H), 7.37 – 7.29 (m, 2H), 7.21 (t,  $J = 7.8$  Hz, 1H), 6.92 (d,  $J = 7.5$  Hz, 1H), 2.72 (s, 3H), 2.35 (s, 3H).

**1-(2-(tert-Butyl)phenyl)-3-(2-methylquinolin-4-yl)urea, 4{13,22}**:  $^1\text{H}$  NMR (400 MHz, MeOD)  $\delta$  8.36 (s, 1H), 8.18 (d,  $J = 8.5$  Hz, 1H), 7.93 (d,  $J = 8.5$  Hz, 1H), 7.85 – 7.77 (m, 1H), 7.65 (t,  $J = 7.7$  Hz, 1H), 7.60 (s, 1H), 7.33 (d,  $J = 9.0$  Hz, 1H), 7.26 (t,  $J = 7.9$  Hz, 1H), 7.15 (d,  $J = 7.8$  Hz, 1H), 2.71 (s, 3H), 1.34 (s, 9H).

**1-(3-(tert-Butyl)phenyl)-3-(2-methylquinolin-4-yl)urea, 4{13,23}**:  $^1\text{H}$  NMR (400 MHz, MeOD)  $\delta$  8.33 (s, 1H), 8.24 (d,  $J = 8.5$  Hz, 1H), 7.97 (d,  $J = 8.5$  Hz, 1H), 7.89 – 7.81 (m, 1H), 7.71 – 7.65 (m, 1H), 7.51 (d,  $J = 5.4$  Hz, 1H), 7.33 (m, 1H), 7.28 (m, 2H), 2.71 (s, 3H), 1.47 (s, 9H).

**1-(4-(tert-Butyl)phenyl)-3-(2-methylquinolin-4-yl)urea, 4{13,24}**:  $^1\text{H}$  NMR (400 MHz, MeOD)  $\delta$  8.34 (s, 1H), 8.18 (d,  $J = 8.5$  Hz, 1H), 7.92 (d,  $J = 8.5$  Hz, 1H), 7.81 (t,  $J = 7.7$  Hz, 1H), 7.64 (t,  $J = 7.7$  Hz, 1H), 7.44 (m, 2H), 7.37 (m, 2H), 2.70 (s, 3H), 1.32 (s, 9H).

**1-(2-Methylquinolin-4-yl)-3-(4-(trifluoromethyl)phenyl)urea, 4{13,27}**:  $^1\text{H}$  NMR (400 MHz, MeOD)  $\delta$  8.34 (s, 1H), 8.17 (d,  $J = 8.5$  Hz, 1H), 7.94 (d,  $J = 8.4$  Hz, 1H), 7.81 (t,  $J = 7.7$  Hz, 1H), 7.72 (m, 2H), 7.63 (m, 3H), 2.71 (s, 3H).

**1-(2-Methylquinolin-4-yl)-3-(4-nitro-3-(trifluoromethyl)phenyl)urea, 4{13,28}**:  $^1\text{H}$  NMR (400 MHz, MeOD)  $\delta$  8.29 (s, 1H), 8.24 (d,  $J = 2.1$  Hz, 1H), 8.13 (d,  $J = 8.4$  Hz, 1H), 8.09 (d,  $J = 9.0$  Hz, 1H), 7.96 (d,  $J = 8.3$  Hz, 1H), 7.91 (dd,  $J = 8.9, 2.2$  Hz, 1H), 7.80 – 7.75 (m, 1H), 7.64 (d,  $J = 8.2$  Hz, 1H), 2.71 (s, 3H).

**1-(2-Methylquinolin-4-yl)-3-(2-nitrophenyl)urea, 4{13,41}**:  $^1\text{H}$  NMR (400 MHz, MeOD)  $\delta$  7.81 (s, 1H), 7.53 (s, 1H), 7.34 (d,  $J = 8.5$  Hz, 1H), 7.14 (t,  $J = 7.8$  Hz, 2H), 7.00 (t,  $J = 7.7$  Hz, 2H), 6.84 (t,  $J = 7.7$  Hz, 1H), 6.77 (t,  $J = 8.2$  Hz, 1H), 1.91 (s, 3H).

**1-(2-Methylquinolin-4-yl)-3-(3-nitrophenyl)urea, 4{13,42}**:  $^1\text{H}$  NMR (400 MHz, MeOD)  $\delta$  8.63 (s, 1H), 8.34 (s, 1H), 8.16 (d,  $J = 8.5$  Hz, 1H), 7.95 (m, 2H), 7.81 (m, 2H), 7.69 – 7.62 (m, 1H), 7.58 (t,  $J = 8.2$  Hz, 1H), 2.73 (s, 3H).

**1-(4-Hydroxyphenyl)-3-(2-methylquinolin-4-yl)urea, 4{13,43}**:  $^1\text{H}$  NMR (400 MHz, MeOD)  $\delta$  8.44 (s, 1H), 8.31 (s, 1H), 8.25 (d,  $J = 8.3$  Hz, 1H), 7.98 (d,  $J = 8.5$  Hz, 1H), 7.90 (t,  $J = 7.7$  Hz, 1H), 7.73 (t,  $J = 7.7$  Hz, 1H), 7.35 (d,  $J = 8.7$  Hz, 2H), 6.81 (d,  $J = 8.7$  Hz, 2H), 2.77 (s, 3H).

**1-(2-Aminophenyl)-3-(2-methylquinolin-4-yl)urea, 4{13,44}**:  $^1\text{H}$  NMR (400 MHz, MeOD)  $\delta$  8.36 (d,  $J = 11.6$  Hz, 1H), 8.21 (d,  $J = 8.4$  Hz, 1H), 7.95 (d,  $J = 8.4$  Hz, 1H), 7.83 (dd,  $J = 8.3, 7.1$  Hz, 1H), 7.66 (t,  $J = 7.7$  Hz, 1H), 7.34 – 7.28 (m, 1H), 7.05 (dd,  $J = 11.0, 4.4$  Hz, 1H), 6.89 (dd,  $J = 8.0, 1.1$  Hz, 1H), 6.76 (ddd,  $J = 8.7, 7.7, 1.4$  Hz, 1H), 2.71 (s, 3H).

**1-(4-Aminophenyl)-3-(2-methylquinolin-4-yl)urea, 4{13,45}**:  $^1\text{H}$  NMR (400 MHz, MeOD)  $\delta$  8.61 (s, 2H), 8.51 (s, 1H), 8.35 (d,  $J = 8.4$  Hz, 1H), 8.15 (d,  $J = 8.6$  Hz, 1H), 8.05 – 7.94 (m, 1H), 7.82 (dd,  $J = 15.4, 8.4$  Hz, 2H), 7.74 (s, 1H), 6.93 (d,  $J = 8.7$  Hz, 1H), 2.86 (s, 3H).

**2-(3-(2-Methylquinolin-4-yl)ureido)benzamide, 4{13,49}**: <sup>1</sup>H NMR (400 MHz, Acetone) δ 10.77 (s, 1H), 8.34 (d, *J* = 8.5 Hz, 1H), 8.18 (d, *J* = 8.5 Hz, 1H), 7.98 (s, 1H), 7.78 (d, *J* = 8.4 Hz, 1H), 7.66 (d, *J* = 7.9 Hz, 1H), 7.54 (dd, *J* = 8.1, 7.1 Hz, 2H), 7.41 – 7.29 (m, 2H), 6.95 (t, *J* = 7.6 Hz, 1H), 3.18 (s, 3H).

**3-(3-(2-Methylquinolin-4-yl)ureido)benzamide, 4{13,50}**: <sup>1</sup>H NMR (400 MHz, MeOD) δ 8.42 (s, 1H), 8.23 (d, *J* = 8.5 Hz, 1H), 8.05 (d, *J* = 1.5 Hz, 1H), 7.97 (d, *J* = 8.5 Hz, 1H), 7.87 (dd, *J* = 8.3, 7.1 Hz, 1H), 7.81 – 7.75 (m, 1H), 7.70 (dd, *J* = 8.3, 7.1 Hz, 1H), 7.59 (dd, *J* = 7.7, 1.0 Hz, 1H), 7.46 (t, *J* = 7.9 Hz, 1H), 2.75 (s, 3H).

**1-(1H-benzo[d]imidazol-6-yl)-3-(2-methylquinolin-4-yl)urea, 4{13,60}**: <sup>1</sup>H NMR (400 MHz, MeOD) δ 8.41 (s, 2H), 8.37 (s, 1H), 8.19 (d, *J* = 8.4 Hz, 1H), 8.16 (s, 1H), 8.05 (s, 1H), 7.96 (d, *J* = 7.7 Hz, 1H), 7.82 (t, *J* = 7.6 Hz, 1H), 7.67 (d, *J* = 7.2 Hz, 1H), 7.60 (d, *J* = 8.6 Hz, 1H), 7.27 (d, *J* = 8.6 Hz, 1H), 2.73 (s, 3H).

**1-(5-Chloro-2-methoxyphenyl)-3-(1H-imidazol-2-yl)urea, 4{19,1}**: <sup>1</sup>H NMR (400 MHz, MeOD) δ 8.30 – 8.26 (m, 1H), 7.02 – 6.94 (m, 2H), 6.78 (s, 2H), 3.94 (s, 3H).

**1-(3-Chloro-4-methylphenyl)-3-(1H-imidazol-2-yl)urea, 4{19,2}**: <sup>1</sup>H NMR (400 MHz, MeOD) δ 8.36 (s, 1H), 7.69 (s, 1H), 7.21 (dd, *J* = 11.6, 3.2 Hz, 2H), 6.83 (d, *J* = 26.0 Hz, 2H), 2.33 (s, 3H).

**1-(3-Chloro-4-methoxyphenyl)-3-(1H-imidazol-2-yl)urea, 4{19,3}**: <sup>1</sup>H NMR (400 MHz, MeOD) δ 8.31 (s, 1H), 7.66 (d, *J* = 2.6 Hz, 1H), 7.31 (dd, *J* = 8.8, 2.5 Hz, 1H), 7.04 (d, *J* = 8.9 Hz, 1H), 6.88 (s, 2H), 3.88 (s, 3H).

**1-(4-Ethylphenyl)-3-(1H-imidazol-2-yl)urea, 4{19,4}**: <sup>1</sup>H NMR (400 MHz, MeOD) δ 8.49 (s, 1H), 7.53 – 7.28 (m, 2H), 7.16 (d, *J* = 8.3 Hz, 2H), 6.81 (d, *J* = 16.2 Hz, 2H), 2.62 (q, *J* = 7.5 Hz, 2H), 1.23 (t, *J* = 7.6 Hz, 3H).

**1-(3,4-Dichlorophenyl)-3-(1H-imidazol-2-yl)urea, 4{19,8}**: <sup>1</sup>H NMR (400 MHz, MeOD) δ 8.26 (s, 1H), 7.89 (d, *J* = 2.3 Hz, 1H), 7.41 (dd, *J* = 16.2, 5.5 Hz, 2H), 6.90 (s, 2H).

**1-(2,4-Dichlorophenyl)-3-(1H-imidazol-2-yl)urea, 4{19,9}**: <sup>1</sup>H NMR (400 MHz, MeOD) δ 8.57 (s, 1H), 8.26 (d, *J* = 9.0 Hz, 1H), 7.52 – 7.27 (m, 2H), 6.79 (s, 2H).

### Biological Assay.

Two *P. falciparum* strains were used in this study and were provided by the MR4 Unit of the American Type Culture Collection (ATCC, Manassas, VA). Those two strains were the chloroquine sensitive strain 3D7 and the chloroquine resistant strain K1.

Asynchronous parasites were maintained in culture based on the method of Trager<sup>2</sup>. Parasites were grown in presence of fresh group O-positive erythrocytes (Lifeblood Memphis, TN) in Petri dishes at a hematocrite of 4-6% in RPMI based media. It consisted of RPMI 1640 supplemented with 0.5% AlbuMAX II, 25 mM HEPES, 25 mM NaHCO<sub>3</sub> (pH 7.3), 100ug/mL hypoxanthine, and 5 ug/mL gentamycin. Cultures were incubated at 37C in a gas mixture of 90% N<sub>2</sub>, 5% O<sub>2</sub>, 5% CO<sub>2</sub>. For IC<sub>50</sub> determinations, 20ul of RPMI 1640 with 5ug/ml gentamycin were dispensed per well in an assay plate (384-well microplate, clear bottom, tissue treated). 40nl of compound, previously serial diluted in a separate 384-well white polypropylene plate, were dispensed in the assay plate and then 20ul of a synchronized culture suspension (1% rings, 10% hematocrite) were added per well thus making a final hematocrite and parasitemia of 2% and 1% respectively. Assay plates were incubated for 72h and the parasitemia were determined by a method previously described<sup>3</sup>: Briefly, 10ul of the following solution in RPMI (10X Sybr Green I, 0.5% v/v triton, 0.5 mg/ml saponin) were added per well, assay plates were shaken for 30s, incubated in the dark for 4h, then read with the Envision spectrophotometer at Ex/Em 485nm/535nm. IC<sub>50</sub>s were calculated with the Graphpad PRISM software.

## Cytotoxicity assays

BJ, HEK293, Hep G2, and Raji cell lines were purchased from the American Type Culture Collection (ATCC, Manassas, VA) and were cultured according to recommendations. Cell culture media were purchased from ATCC. Cells were routinely tested for mycoplasma contamination using the MycoAlert Mycoplasma Detection Kit (Lonza). Exponentially growing cells were plated in Corning 384 well white custom assay plates, and incubated overnight at 37° C in a humidified, 5% CO<sub>2</sub> incubator. DMSO inhibitor stock solutions were added the following day to a top final concentration of 25 μM, 0.25% DMSO and then diluted 1/3 for a total of ten testing concentrations. Cytotoxicity was determined following a 72 hour incubation using Promega Cell Titer Glo Reagent according to the manufacturer's recommendation. Luminescence was measured on an Envision plate reader (Perkin Elmer).

## PAMPA permeability assays

Parallel Artificial membrane Permeability Assay (PAMPA) was conducted by Biomek FX lab automation workstation (Beckman Coulter, Inc., Fullerton, CA) and PAMPA evolution 96 command software (pION Inc., Woburn, MA). The detailed method is described as following. 3 μL 10 μM test compound stock was mixed with 600 μL of SSB (system solution buffer, pH 7.4 or 4, pION Inc., Woburn, MA) to make diluted test compound. 150 μL of diluted test compound was transferred to a UV plate (pION Inc., Woburn, MA) and the UV spectrum was read as the reference plate. The membrane on pre-loaded PAMPA sandwich (pION Inc., Woburn, MA) was painted with 4 μL GIT lipid (pION Inc., Woburn, MA). The acceptor chamber was then filled with 200 μL ASB (acceptor solution buffer, pION Inc., Woburn, MA), and the donor chamber was filled with 180 μL diluted test compound. The PAMPA sandwich was assembled, placed on the Gut-box and stirred for 30 minutes. Aqueous Boundary Layer was set to 40 μm for stirring. The UV spectrum (250-500 nm) of the donor and the acceptor were read. The permeability coefficient was calculated using PAMPA evolution 96 command software (pION Inc., Woburn, MA) based on the AUC of the reference plate, the donor plate and the acceptor plate. All compounds were tested in triplicates.

## Solubility assays

Solubility assay was carried out on Biomek FX lab automation workstation (Beckman Coulter, Inc., Fullerton, CA) using μSOL Evolution software (pION Inc., Woburn, MA). The detailed method is described as following. 10 μL of compound stock was added to 190 μL 1-propanol to make a reference stock plate. 5 μL from this reference stock plate was mixed with 70 μL 1-propanol and 75 μL phosphate buffered saline (PBS, pH 7.4 and 4) to make the reference plate, and the UV spectrum (250 nm – 500 nm) of the reference plate was read. 6 μL of 10 mM test compound stock was added to 600 μL PBS in a 96-well storage plate and mixed. The storage plate was sealed and incubated at room temperature for 18 hours. The suspension was then filtered through a 96-well filter plate (pION Inc., Woburn, MA). 75 μL filtrate was mixed with 75 μL 1-propanol to make the sample plate, and the UV spectrum of the sample plate was read. Calculation was carried out by μSOL Evolution software based on the AUC (area under curve) of UV spectrum of the sample plate and the reference plate. All compounds were tested in triplicates.

## Kinase assays (KINOMEscan™, Ambit Biosciences).

For most assays, kinase-tagged T7 phage strains were grown in parallel in 24-well blocks in an *E. coli* host derived from the BL21 strain. *E. coli* were grown to log-phase and infected with T7 phage from a frozen stock (multiplicity of infection = 0.4) and incubated with shaking at 32°C until lysis (90-150 minutes). The lysates were centrifuged (6,000 x g) and filtered (0.2μm) to remove cell debris. The remaining kinases were produced in HEK-293 cells and subsequently tagged with DNA for qPCR detection. Streptavidin-coated magnetic beads were treated with biotinylated small molecule ligands for

30 minutes at room temperature to generate affinity resins for kinase assays. The liganded beads were blocked with excess biotin and washed with blocking buffer (SeaBlock (Pierce), 1 % BSA, 0.05 % Tween 20, 1 mM DTT) to remove unbound ligand and to reduce non-specific phage binding. Binding reactions were assembled by combining kinases, liganded affinity beads, and test compounds in 1x binding buffer (20 % SeaBlock, 0.17x PBS, 0.05 % Tween 20, 6 mM DTT). Test compounds were prepared as 40x stocks in 100% DMSO and directly diluted into the assay. All reactions were performed in polypropylene 384-well plates in a final volume of 0.04 ml. The assay plates were incubated at room temperature with shaking for 1 hour and the affinity beads were washed with wash buffer (1x PBS, 0.05 % Tween 20). The beads were then re-suspended in elution buffer (1x PBS, 0.05 % Tween 20, 0.5  $\mu$ m non-biotinylated affinity ligand) and incubated at room temperature with shaking for 30 minutes. The kinase concentration in the eluates was measured by qPCR.

#### **Pharmacophore generation for compounds 4{13,1}, 4{13,39} and 4{13,58}.**

All pharmacophore analysis were performed in Chemical Computing Group's Molecular Operating Environment (MOE). The pharmacophoric and structure features were generated based on one conformation of the most active molecules 4{13,1}, 4{13,39} and 4{13,58}. Each compound was built using the Molecular Builder module. A systematic conformational search of all rotatable bonds were performed using default parameters and with the Energy Minimize Resulting Conformations option ON. For each compound, the conformer with the lowest energy was used for a pharmacophore query generation. Pharmacophore features of each compound were identified according to the PCH (Polarity-Charge-Hydrophobicity) pharmacophore scheme.

**Table 1.** LC/MS characterization of diarylureas **4**{x,y}

| <b>Compound</b> | <b>Formula</b>                                                                | <b>Molecular weight</b> | <b>Found Mass, [M+1]</b> | <b>retention time (min)</b> | <b>Purity, % (UV)</b> | <b>Analytic Method <sup>a</sup></b> |
|-----------------|-------------------------------------------------------------------------------|-------------------------|--------------------------|-----------------------------|-----------------------|-------------------------------------|
| 4{1,1}          | C <sub>14</sub> H <sub>12</sub> Cl <sub>2</sub> N <sub>2</sub> O <sub>2</sub> | 311.2                   | 310.9                    | 2.04                        | 100                   | Method A                            |
| 4{1,2}          | C <sub>14</sub> H <sub>12</sub> Cl <sub>2</sub> N <sub>2</sub> O              | 295.2                   | 294.9                    | 2.00                        | 100                   | Method A                            |
| 4{1,3}          | C <sub>14</sub> H <sub>12</sub> Cl <sub>2</sub> N <sub>2</sub> O <sub>2</sub> | 311.2                   | 311.0                    | 1.78                        | 99                    | Method A                            |
| 4{1,4}          | C <sub>15</sub> H <sub>15</sub> ClN <sub>2</sub> O                            | 274.8                   | 275.1                    | 2.97                        | 100                   | Method B                            |
| 4{1,5}          | C <sub>14</sub> H <sub>13</sub> ClN <sub>2</sub> O                            | 260.7                   | 261.1                    | 1.77                        | 90                    | Method A                            |
| 4{1,8}          | C <sub>13</sub> H <sub>9</sub> Cl <sub>3</sub> N <sub>2</sub> O               | 315.6                   | 314.9                    | 2.06                        | 100                   | Method A                            |
| 4{2,1}          | C <sub>14</sub> H <sub>11</sub> Cl <sub>3</sub> N <sub>2</sub> O <sub>2</sub> | 345.6                   | 345.0                    | 3.17                        | 100                   | Method B                            |
| 4{2,2}          | C <sub>14</sub> H <sub>11</sub> Cl <sub>3</sub> N <sub>2</sub> O              | 329.6                   | 329.0                    | 3.06                        | 100                   | Method B                            |
| 4{2,3}          | C <sub>14</sub> H <sub>11</sub> Cl <sub>3</sub> N <sub>2</sub> O <sub>2</sub> | 345.6                   | 345.0                    | 3.07                        | 100                   | Method B                            |
| 4{2,4}          | C <sub>15</sub> H <sub>14</sub> Cl <sub>2</sub> N <sub>2</sub> O              | 309.2                   | 309.0                    | 3.15                        | 100                   | Method B                            |
| 4{2,5}          | C <sub>14</sub> H <sub>12</sub> Cl <sub>2</sub> N <sub>2</sub> O              | 295.2                   | 295.0                    | 3.10                        | 100                   | Method B                            |
| 4{2,6}          | C <sub>13</sub> H <sub>9</sub> Cl <sub>3</sub> N <sub>2</sub> O               | 315.6                   | 314.8                    | 2.13                        | 98                    | Method A                            |
| 4{2,7}          | C <sub>13</sub> H <sub>9</sub> Cl <sub>3</sub> N <sub>2</sub> O               | 315.6                   | 314.9                    | 2.13                        | 100                   | Method A                            |
| 4{3,1}          | C <sub>14</sub> H <sub>12</sub> Cl <sub>2</sub> N <sub>2</sub> O <sub>2</sub> | 311.2                   | 311.0                    | 3.04                        | 100                   | Method B                            |
| 4{3,2}          | C <sub>14</sub> H <sub>12</sub> Cl <sub>2</sub> N <sub>2</sub> O              | 295.2                   | 295.0                    | 3.05                        | 100                   | Method B                            |
| 4{3,3}          | C <sub>14</sub> H <sub>12</sub> Cl <sub>2</sub> N <sub>2</sub> O <sub>2</sub> | 311.2                   | 313.1                    | 2.84                        | 100                   | Method B                            |
| 4{3,4}          | C <sub>15</sub> H <sub>15</sub> ClN <sub>2</sub> O                            | 274.8                   | 275.1                    | 2.97                        | 100                   | Method B                            |
| 4{3,5}          | C <sub>14</sub> H <sub>13</sub> ClN <sub>2</sub> O                            | 260.7                   | 261.1                    | 2.88                        | 100                   | Method B                            |
| 4{4,1}          | C <sub>14</sub> H <sub>11</sub> Cl <sub>3</sub> N <sub>2</sub> O <sub>2</sub> | 345.6                   | 346.9                    | 3.18                        | 100                   | Method B                            |
| 4{4,2}          | C <sub>14</sub> H <sub>11</sub> Cl <sub>3</sub> N <sub>2</sub> O              | 329.6                   | 330.9                    | 3.20                        | 100                   | Method B                            |
| 4{4,3}          | C <sub>14</sub> H <sub>11</sub> Cl <sub>3</sub> N <sub>2</sub> O <sub>2</sub> | 345.6                   | 345.0                    | 1.97                        | 99                    | Method A                            |
| 4{4,4}          | C <sub>15</sub> H <sub>14</sub> Cl <sub>2</sub> N <sub>2</sub> O              | 309.2                   | 309.0                    | 2.10                        | 97                    | Method A                            |
| 4{4,5}          | C <sub>14</sub> H <sub>12</sub> Cl <sub>2</sub> N <sub>2</sub> O              | 295.2                   | 295.0                    | 1.97                        | 97                    | Method A                            |
| 4{4,6}          | C <sub>13</sub> H <sub>9</sub> Cl <sub>3</sub> N <sub>2</sub> O               | 315.6                   | 315.0                    | 2.08                        | 99                    | Method A                            |
| 4{4,7}          | C <sub>13</sub> H <sub>9</sub> Cl <sub>3</sub> N <sub>2</sub> O               | 315.6                   | 314.9                    | 2.08                        | 98                    | Method A                            |
| 4{5,2}          | C <sub>14</sub> H <sub>12</sub> Cl <sub>2</sub> N <sub>2</sub> O              | 295.2                   | 294.9                    | 2.02                        | 99                    | Method A                            |
| 4{5,6}          | C <sub>13</sub> H <sub>10</sub> Cl <sub>2</sub> N <sub>2</sub> O              | 281.1                   | 280.8                    | 1.91                        | 100                   | Method A                            |
| 4{6,1}          | C <sub>14</sub> H <sub>12</sub> ClFN <sub>2</sub> O <sub>2</sub>              | 294.7                   | 295.0                    | 1.92                        | 100                   | Method A                            |
| 4{6,2}          | C <sub>14</sub> H <sub>12</sub> ClFN <sub>2</sub> O                           | 278.7                   | 279.1                    | 1.89                        | 100                   | Method A                            |
| 4{6,4}          | C <sub>15</sub> H <sub>15</sub> FN <sub>2</sub> O                             | 258.3                   | 259.2                    | 1.81                        | 99                    | Method A                            |
| 4{6,6}          | C <sub>13</sub> H <sub>10</sub> ClFN <sub>2</sub> O                           | 264.7                   | 265.0                    | 1.78                        | 100                   | Method A                            |
| 4{6,7}          | C <sub>13</sub> H <sub>10</sub> ClFN <sub>2</sub> O                           | 264.7                   | 265.0                    | 1.78                        | 100                   | Method A                            |
| 4{6,8}          | C <sub>13</sub> H <sub>9</sub> Cl <sub>2</sub> FN <sub>2</sub> O              | 299.1                   | 298.9                    | 1.96                        | 100                   | Method A                            |
| 4{7,1}          | C <sub>16</sub> H <sub>17</sub> ClN <sub>2</sub> O <sub>2</sub>               | 304.8                   | 305.0                    | 2.07                        | 98                    | Method A                            |
| 4{7,2}          | C <sub>16</sub> H <sub>17</sub> ClN <sub>2</sub> O                            | 288.8                   | 289.1                    | 2.04                        | 99                    | Method A                            |
| 4{7,3}          | C <sub>16</sub> H <sub>17</sub> ClN <sub>2</sub> O <sub>2</sub>               | 304.8                   | 305.0                    | 1.82                        | 99                    | Method A                            |
| 4{7,5}          | C <sub>16</sub> H <sub>18</sub> N <sub>2</sub> O                              | 254.3                   | 255.2                    | 1.82                        | 99                    | Method A                            |

|          |               |       |       |      |     |          |
|----------|---------------|-------|-------|------|-----|----------|
| 4{7,8}   | C15H14Cl2N2O  | 309.2 | 309.1 | 2.10 | 100 | Method A |
| 4{8,1}   | C18H15CIN2O2  | 326.8 | 327.1 | 3.16 | 100 | Method B |
| 4{8,2}   | C18H15CIN2O   | 310.8 | 311.6 | 2.10 | 100 | Method B |
| 4{8,3}   | C18H15CIN2O2  | 326.8 | 327.1 | 2.82 | 100 | Method B |
| 4{8,4}   | C19H18N2O     | 290.4 | 291.2 | 2.71 | 100 | Method B |
| 4{9,1}   | C18H15CIN2O2  | 326.8 | 327.1 | 2.24 | 100 | Method B |
| 4{9,2}   | C18H15CIN2O   | 310.8 | 311.1 | 3.08 | 100 | Method B |
| 4{9,3}   | C18H15CIN2O2  | 326.8 | 327.2 | 1.85 | 93  | Method A |
| 4{9,4}   | C19H18N2O     | 290.4 | 291.3 | 3.00 | 100 | Method B |
| 4{9,5}   | C18H16N2O     | 276.3 | 277.0 | 1.84 | 99  | Method A |
| 4{9,6}   | C17H13CIN2O   | 296.8 | 296.9 | 1.95 | 86  | Method A |
| 4{9,7}   | C17H13CIN2O   | 296.8 | 297.1 | 1.95 | 88  | Method A |
| 4{10,1}  | C17H14CIN3O2  | 327.8 | 327.1 | 2.46 | 100 | Method B |
| 4{10,2}  | C17H14CIN3O   | 311.8 | 312.1 | 1.52 | 100 | Method C |
| 4{10,3}  | C17H14CIN3O2  | 327.8 | 328.1 | 2.36 | 100 | Method B |
| 4{10,4}  | C18H17N3O     | 291.4 | 292.1 | 1.42 | 100 | Method C |
| 4{11,1}  | C17H14CIN3O2  | 327.8 | 328.1 | 2.05 | 98  | Method A |
| 4{11,2}  | C17H14CIN3O   | 311.8 | 312.1 | 3.10 | 88  | Method B |
| 4{11,3}  | C17H14CIN3O2  | 327.8 | 328.0 | 1.81 | 95  | Method A |
| 4{11,4}  | C18H17N3O     | 291.4 | 291.7 | 2.99 | 100 | Method B |
| 4{11,5}  | C17H15N3O     | 277.3 | 278.1 | 1.81 | 96  | Method A |
| 4{11,6}  | C16H12CIN3O   | 297.7 | 298.0 | 1.95 | 97  | Method A |
| 4{11,7}  | C16H12CIN3O   | 297.7 | 298.1 | 1.96 | 99  | Method A |
| 4{11,8}  | C16H11Cl2N3O  | 332.2 | 332.1 | 2.15 | 98  | Method A |
| 4{12,1}  | C17H14CIN3O2  | 327.8 | 328.1 | 3.10 | 100 | Method B |
| 4{12,2}  | C17H14CIN3O   | 311.8 | 312.1 | 1.59 | 100 | Method B |
| 4{12,3}  | C17H14CIN3O2  | 327.8 | 328.0 | 1.71 | 100 | Method B |
| 4{12,4}  | C18H17N3O     | 291.4 | 292.1 | 1.10 | 100 | Method C |
| 4{13,1}  | C18H16CIN3O2  | 341.8 | 342.1 | 2.53 | 100 | Method B |
| 4{13,10} | C17H14CIN3O   | 311.8 | 312.2 | 2.36 | 100 | Method B |
| 4{13,11} | C17H13Cl2N3O  | 346.2 | 346.0 | 2.28 | 100 | Method B |
| 4{13,12} | C18H13ClF3N3O | 379.8 | 382.2 | 6.08 | 100 | Method D |
| 4{13,13} | C17H14FN3O    | 295.3 | 296.1 | 2.21 | 100 | Method B |
| 4{13,14} | C17H14FN3O    | 295.3 | 296.1 | 2.99 | 100 | Method B |
| 4{13,15} | C17H14FN3O    | 295.3 | 296.2 | 2.18 | 100 | Method B |
| 4{13,16} | C17H13F2N3O   | 313.3 | 314.1 | 2.17 | 100 | Method B |
| 4{13,17} | C17H13F2N3O   | 313.3 | 314.1 | 2.25 | 100 | Method B |
| 4{13,18} | C17H13F2N3O   | 313.3 | 314.1 | 2.69 | 100 | Method B |
| 4{13,19} | C17H13F2N3O   | 313.3 | 314.1 | 2.41 | 100 | Method B |
| 4{13,2}  | C18H16CIN3O   | 325.8 | 326.1 | 2.54 | 100 | Method B |
| 4{13,20} | C18H16FN3O2   | 325.3 | 326.2 | 2.13 | 100 | Method B |
| 4{13,21} | C18H17N3O     | 291.4 | 292.5 | 5.07 | 100 | Method D |
| 4{13,22} | C21H23N3O     | 333.4 | 335.3 | 6.00 | 92  | Method D |



|          |              |       |       |      |     |          |
|----------|--------------|-------|-------|------|-----|----------|
| 4{13,23} | C21H23N3O    | 333.4 | 334.1 | 5.30 | 100 | Method D |
| 4{13,24} | C21H23N3O    | 333.4 | 335.4 | 6.03 | 100 | Method D |
| 4{13,25} | C18H14F3N3O  | 345.3 | 346.1 | 2.12 | 100 | Method B |
| 4{13,26} | C18H14F3N3O  | 345.3 | 346.2 | 5.67 | 100 | Method D |
| 4{13,27} | C18H14F3N3O  | 345.3 | 346.6 | 5.60 | 100 | Method D |
| 4{13,28} | C18H13F3N4O3 | 390.3 | 390.9 | 5.95 | 100 | Method D |
| 4{13,29} | C18H17N3O2   | 307.4 | 308.7 | 4.92 | 100 | Method D |
| 4{13,3}  | C18H16ClN3O2 | 341.8 | 342.1 | 2.25 | 100 | Method B |
| 4{13,30} | C18H17N3O2   | 307.4 | 308.1 | 2.03 | 100 | Method B |
| 4{13,31} | C18H17N3O2   | 307.4 | 308.2 | 2.16 | 100 | Method B |
| 4{13,32} | C19H19N3O3   | 337.4 | 338.1 | 2.76 | 100 | Method B |
| 4{13,33} | C18H14F3N3O2 | 361.3 | 362.1 | 2.51 | 100 | Method B |
| 4{13,34} | C18H14F3N3O2 | 361.3 | 362.1 | 2.56 | 100 | Method B |
| 4{13,35} | C18H14F3N3O2 | 361.3 | 362.1 | 2.48 | 100 | Method B |
| 4{13,36} | C18H17N3OS   | 323.4 | 324.1 | 2.21 | 100 | Method B |
| 4{13,37} | C18H17N3OS   | 323.4 | 324.1 | 2.28 | 100 | Method B |
| 4{13,38} | C18H14F3N3OS | 377.4 | 378.1 | 2.57 | 100 | Method B |
| 4{13,39} | C19H20N4O    | 320.4 | 321.0 | 4.48 | 100 | Method D |
| 4{13,4}  | C19H19N3O    | 305.4 | 306.2 | 2.46 | 100 | Method B |
| 4{13,40} | C19H20N4O    | 320.4 | 321.0 | 3.92 | 95  | Method D |
| 4{13,41} | C17H14N4O3   | 322.3 | 323.2 | 5.03 | 95  | Method D |
| 4{13,42} | C17H14N4O3   | 322.3 | 322.8 | 5.08 | 100 | Method D |
| 4{13,43} | C17H15N3O2   | 293.3 | 294.2 | 4.03 | 100 | Method D |
| 4{13,44} | C17H16N4O    | 292.3 | 293.0 | 4.27 | 100 | Method D |
| 4{13,45} | C17H16N4O    | 292.3 | 293.0 | 4.95 | 100 | Method D |
| 4{13,46} | C19H17N3O2   | 319.4 | 320.2 | 2.00 | 100 | Method B |
| 4{13,47} | C19H17N3O3   | 335.4 | 336.1 | 2.19 | 100 | Method B |
| 4{13,48} | C19H17N3O3   | 335.4 | 336.1 | 2.16 | 100 | Method B |
| 4{13,49} | C18H16N4O2   | 320.4 | 320.9 | 4.72 | 100 | Method D |
| 4{13,5}  | C18H17N3O    | 291.4 | 292.2 | 2.22 | 100 | Method B |
| 4{13,50} | C18H16N4O2   | 320.4 | 321.2 | 4.00 | 100 | Method D |
| 4{13,51} | C18H16N4O2   | 320.4 | 321.1 | 1.63 | 100 | Method B |
| 4{13,52} | C18H15N3O3   | 321.3 | 322.1 | 2.03 | 100 | Method B |
| 4{13,53} | C18H14FN3O3  | 339.3 | 340.1 | 3.03 | 100 | Method B |
| 4{13,54} | C18H15N3O4   | 337.3 | 338.1 | 1.84 | 100 | Method B |
| 4{13,55} | C16H14N4O    | 278.3 | 279.1 | 2.04 | 100 | Method B |
| 4{13,56} | C17H16N4O    | 292.3 | 293.2 | 0.45 | 100 | Method C |
| 4{13,57} | C20H16N4O    | 328.4 | 329.1 | 2.16 | 100 | Method B |
| 4{13,58} | C17H13N5OS   | 335.4 | 336.0 | 2.38 | 100 | Method B |
| 4{13,59} | C18H15N3O3   | 321.3 | 322.1 | 2.95 | 100 | Method B |
| 4{13,6}  | C17H14ClN3O  | 311.8 | 312.0 | 5.08 | 100 | Method D |
| 4{13,60} | C18H15N5O    | 317.3 | 318.2 | 2.02 | 100 | Method B |
| 4{13,7}  | C17H14ClN3O  | 311.8 | 312.2 | 2.35 | 100 | Method B |

|         |               |       |       |      |     |          |
|---------|---------------|-------|-------|------|-----|----------|
| 4{13,8} | C17H13Cl2N3O  | 346.2 | 346.0 | 2.55 | 100 | Method B |
| 4{13,9} | C17H13Cl2N3O  | 346.2 | 346.1 | 5.80 | 100 | Method D |
| 4{14,1} | C13H12ClN3O2  | 277.7 | 278.1 | 2.25 | 100 | Method B |
| 4{14,2} | C13H12ClN3O   | 261.7 | 262.0 | 1.53 | 100 | Method C |
| 4{14,3} | C13H12ClN3O2  | 277.7 | 277.9 | 2.95 | 100 | Method B |
| 4{14,4} | C14H15N3O     | 241.3 | 242.1 | 1.67 | 100 | Method C |
| 4{15,1} | C13H12ClN3O2  | 277.7 | 278.1 | 2.58 | 100 | Method B |
| 4{15,2} | C13H12ClN3O   | 261.7 | 262.1 | 2.72 | 100 | Method B |
| 4{15,3} | C13H12ClN3O2  | 277.7 | 278.0 | 2.36 | 100 | Method B |
| 4{15,4} | C14H15N3O     | 241.3 | 242.1 | 2.05 | 100 | Method C |
| 4{16,1} | C13H12ClN3O2  | 277.7 | 278.1 | 2.25 | 100 | Method B |
| 4{16,2} | C13H12ClN3O   | 261.7 | 262.1 | 1.09 | 100 | Method C |
| 4{16,3} | C13H12ClN3O   | 261.7 | 261.9 | 1.10 | 100 | Method A |
| 4{16,3} | C13H12ClN3O2  | 277.7 | 278.0 | 0.84 | 100 | Method C |
| 4{16,4} | C14H15N3O     | 241.3 | 241.9 | 1.01 | 100 | Method A |
| 4{16,4} | C14H15N3O     | 241.3 | 242.1 | 1.01 | 100 | Method C |
| 4{16,5} | C13H13N3O     | 227.3 | 228.0 | 0.87 | 100 | Method A |
| 4{16,6} | C12H10ClN3O   | 247.7 | 247.7 | 0.95 | 100 | Method A |
| 4{16,7} | C12H10ClN3O   | 247.7 | 247.9 | 0.95 | 100 | Method A |
| 4{16,8} | C12H9Cl2N3O   | 282.1 | 281.7 | 1.16 | 100 | Method A |
| 4{17,1} | C14H14ClN3O2  | 291.7 | 292.1 | 2.54 | 100 | Method B |
| 4{17,2} | C14H14ClN3O2  | 291.7 | 292.0 | 1.54 | 100 | Method A |
| 4{17,3} | C14H14ClN3O   | 275.7 | 276.0 | 1.55 | 100 | Method A |
| 4{17,4} | C14H14ClN3O2  | 291.7 | 292.1 | 1.23 | 99  | Method A |
| 4{17,4} | C15H17N3O     | 255.3 | 256.2 | 1.59 | 100 | Method C |
| 4{17,7} | C13H12ClN3O   | 261.7 | 261.9 | 1.38 | 98  | Method A |
| 4{17,8} | C13H11Cl2N3O  | 296.2 | 296.0 | 1.70 | 96  | Method A |
| 4{18,1} | C15H13ClN4O2  | 316.7 | 317.0 | 2.46 | 100 | Method B |
| 4{18,2} | C15H13ClN4O   | 300.7 | 301.1 | 1.26 | 100 | Method C |
| 4{18,3} | C15H13ClN4O2  | 316.7 | 317.0 | 2.06 | 100 | Method B |
| 4{18,4} | C16H16N4O     | 280.3 | 281.1 | 1.10 | 100 | Method C |
| 4{19,1} | C11H11ClN4O2  | 266.7 | 267.1 | 2.00 | 100 | Method B |
| 4{19,2} | C11H11ClN4O   | 250.7 | 251.1 | 2.15 | 100 | Method B |
| 4{19,3} | C11H11ClN4O2  | 266.7 | 267.1 | 1.81 | 100 | Method B |
| 4{19,4} | C12H14N4O     | 230.3 | 231.1 | 2.04 | 100 | Method B |
| 4{19,5} | C11H12N4O     | 216.2 | 217.0 | 1.79 | 100 | Method B |
| 4{19,7} | C10H9ClN4O    | 236.7 | 237.0 | 1.93 | 100 | Method B |
| 4{19,8} | C10H8Cl2N4O   | 271.1 | 271.0 | 2.23 | 100 | Method B |
| 4{19,9} | C10H8Cl2N4O   | 271.1 | 271.1 | 2.06 | 100 | Method B |
| 4{20,1} | C11H10ClN3O2S | 283.7 | 284.0 | 2.61 | 100 | Method B |
| 4{20,2} | C11H10ClN3OS  | 267.7 | 268.1 | 2.48 | 100 | Method B |
| 4{20,3} | C11H10ClN3O2S | 283.7 | 284.0 | 2.03 | 100 | Method B |
| 4{20,4} | C12H13N3OS    | 247.3 | 248.1 | 1.61 | 100 | Method C |

<sup>a</sup> **Method A:** UPLC-MS (Acquity PDA detector, Acquity SQ detector and Acquity UPLC BEH-C18 column 1.7  $\mu\text{m}$ , 2.1  $\times$  50 mm [Waters]). Eluent solvent A:  $\text{H}_2\text{O}$ +0.1% formic acid, Eluent solvent B: Acetonitrile. Gradient: 0-2.5 min, solvent B 10-95%; 2.5-2.9 min, solvent B 95%; 2.9-2.95 min, solvent B 95-10%. Flow rate: 0.6 mL/min.

**Method B:** UPLC-MS (Acquity PDA detector, Acquity SQ detector and Acquity UPLC BEH-C18 column 1.7  $\mu\text{m}$ , 2.1  $\times$  50 mm [Waters]). Eluent solvent A:  $\text{H}_2\text{O}$ +0.1% formic acid, Eluent solvent B:  $\text{MeOH}$ +0.1% formic acid. Gradient: 0-0.2 min, solvent B 0%; 0.2-2.8 min, solvent B 0-100%; 2.8-3.5 min, solvent B 100%; 3.5-3.7 min, solvent B 100-0%. Flow rate: 0.5 mL/min.

**Method C:** UPLC-MS (Acquity PDA detector, Acquity SQ detector and Acquity UPLC BEH-C18 column 1.7  $\mu\text{m}$ , 2.1  $\times$  50 mm [Waters]). Eluent solvent A:  $\text{H}_2\text{O}$ +0.1% formic acid, Eluent solvent B:  $\text{MeOH}$ +0.1% formic acid. Gradient: Gradient: 0-0.1 min, solvent B 20%; 0.1-1.3 min, solvent B 20-95%; 1.3-1.6 min, solvent B 95%; 1.6-1.8 min, solvent B 95-20%. Flow rate: 0.5 mL/min.

**Method D:** an HPLC-MS (photodiode array, total ion count, and expected mass [ $m/z$ ]) was obtained (Alliance HT, Micromass ZQ 4000 and RP-C18 Xterra column 5  $\mu\text{m}$ , 6 mm  $\times$  50 mm [Waters]). Eluent solvent A:  $\text{H}_2\text{O}$ +0.1% formic acid, Eluent solvent B:  $\text{MeOH}$ +0.1% formic acid. Gradient: 0-8 min, solvent B 5-100%; 8-9 min, solvent B 100%; 9-10 min solvent B 100-5%. Flow rate: 0.5 mL/min.

**Table 2.** Summary of diarylureas **4**{1-20, 1-9}.

| Compound | EC <sub>50</sub><br>( $\mu$ M) <sup>a</sup> |              | PAMPA<br>(Pe, 10 <sup>-6</sup> cm/s) | uSol<br>( $\mu$ M) | Cytotoxicity<br>LD <sub>50</sub> ( $\mu$ M) <sup>a</sup> |        |        |      |
|----------|---------------------------------------------|--------------|--------------------------------------|--------------------|----------------------------------------------------------|--------|--------|------|
|          | 3D7                                         | K1           |                                      |                    | BJ                                                       | HEK293 | Hep G2 | Raji |
| 4{1,1}   | >15                                         | >15          | 0 ± 0                                | 0.0 ± 0.0          | >25                                                      | >25    | >25    | >25  |
| 4{1,2}   | >15                                         | >15          | 0 ± 0                                | 0.1 ± 0.0          | >25                                                      | >25    | >25    | >25  |
| 4{1,3}   | >15                                         | >15          | 20 ± 34                              | 0.0 ± 0.0          | >25                                                      | >25    | >25    | >25  |
| 4{1,4}   | >15                                         | >15          | 73 ± 126                             | 0.3 ± 0.1          | >25                                                      | >25    | >25    | >25  |
| 4{1,5}   | >15                                         | >15          | 16 ± 28                              | 0.2 ± 0.0          | >25                                                      | >25    | >25    | >25  |
| 4{1,8}   | >15                                         | >15          | 0 ± 0                                | 0.0 ± 0.0          | >25                                                      | >25    | >25    | >25  |
| 4{2,1}   | >15                                         | >15          | 0 ± 0                                | 0.2 ± 0.0          | >25                                                      | >25    | >25    | >25  |
| 4{2,2}   | >15                                         | >15          | 0 ± 0                                | 0.1 ± 0.0          | >25                                                      | >25    | >25    | >25  |
| 4{2,3}   | >15                                         | >15          | 364 ± 250                            | 0.0 ± 0.0          | >25                                                      | >25    | >25    | >25  |
| 4{2,4}   | >15                                         | >15          | 0 ± 0                                | 0.3 ± 0.0          | >25                                                      | >25    | >25    | >25  |
| 4{2,5}   | >15                                         | >15          | 29 ± 42                              | 0.3 ± 0.2          | >25                                                      | >25    | >25    | >25  |
| 4{2,6}   | 8.30 ± 0.82                                 | >15          | 8 ± 15                               | 0.0 ± 0.0          | >25                                                      | >25    | >25    | >25  |
| 4{2,7}   | 10.34 ± 2.62                                | 12.36 ± 0.58 | 0 ± 0                                | <0.33 ± 0.0        | >25                                                      | 24     | 22     | 23   |
| 4{3,1}   | 11.93 ± 1.08                                | 12.23 ± 3.41 | 0 ± 0                                | 0.1 ± 0.0          | >25                                                      | >25    | >25    | >25  |
| 4{3,2}   | 7.45 ± 1.96                                 | 10.47 ± 3.71 | 0 ± 0                                | 0.1 ± 0.1          | >25                                                      | >25    | >25    | >25  |
| 4{3,3}   | >15                                         | >15          | 68 ± 66                              | <0.32 ± 0.0        | >25                                                      | >25    | >25    | >25  |
| 4{3,4}   | 10.86 ± 3.59                                | 7.69 ± 3.26  | 38 ± 33                              | 0.3 ± 0.0          | >25                                                      | >25    | >25    | 3.26 |
| 4{3,5}   | >15                                         | >15          | 9 ± 16                               | 0.2 ± 0.0          | >25                                                      | >25    | >25    | >25  |
| 4{4,1}   | 10.93 ± 2.90                                | 9.80 ± 5.21  | 0 ± 0                                | 0.2 ± 0.0          | >25                                                      | >25    | >25    | >25  |
| 4{4,2}   | 11.37 ± 2.11                                | 10.72 ± 2.99 | 5 ± 6                                | 0.0 ± 0.1          | >25                                                      | >25    | >25    | >25  |
| 4{4,3}   | >15                                         | >15          | 0 ± 0                                | 0.1 ± 0.0          | >25                                                      | >25    | >25    | >25  |
| 4{4,4}   | 7.40 ± 2.44                                 | 12.58 ± 2.20 | 0 ± 0                                | 0.1 ± 0.0          | >25                                                      | >25    | >25    | >25  |
| 4{4,5}   | 12.86 ± 1.31                                | 12.80 ± 1.44 | 0 ± 0                                | 0.2 ± 0.0          | >25                                                      | >25    | >25    | 7    |
| 4{4,6}   | 5.86 ± 0.18                                 | 8.70 ± 4.89  | 0 ± 0                                | 0.0 ± 0.0          | >25                                                      | 22     | 18     | 13   |
| 4{4,7}   | 10.19 ± 1.52                                | >15          | 0 ± 0                                | <0.32 ± 0.0        | >25                                                      | 26     | 26     | 16   |
| 4{5,2}   | >15                                         | >15          | 0 ± 0                                | 0.1 ± 0.0          | >25                                                      | >25    | >25    | >25  |
| 4{5,6}   | 5.99 ± 0.05                                 | 3.17         | 0 ± 0                                | 0.5 ± 0.0          | >25                                                      | >25    | 20     | 11   |
| 4{6,1}   | 9.43                                        | 9.14 ± 0.89  | 15 ± 26                              | 0.0 ± 0.0          | >25                                                      | >25    | >25    | 14   |
| 4{6,2}   | >15                                         | >15          | 13 ± 23                              | 0.2 ± 0.1          | >25                                                      | >25    | >25    | >25  |
| 4{6,4}   | >15                                         | >15          | 11 ± 20                              | 0.7 ± 0.0          | >25                                                      | >25    | >25    | >25  |
| 4{6,6}   | 12.65 ± 0.65                                | 13.40 ± 1.72 | 220 ± 112                            | 1.0 ± 0.0          | >25                                                      | >25    | >25    | 15   |
| 4{6,7}   | >15                                         | >15          | 163 ± 64                             | 0.7 ± 0.2          | >25                                                      | >25    | >25    | >25  |
| 4{6,8}   | >15                                         | 11.55 ± 3.34 | 9 ± 15                               | 0.1 ± 0.2          | >25                                                      | >25    | >25    | >25  |
| 4{7,1}   | 12.22 ± 1.13                                | 13.12 ± 0.85 | 0 ± 0                                | 0.1 ± 0.0          | >25                                                      | >25    | >25    | >25  |
| 4{7,2}   | >15                                         | >15          | 53 ± 54                              | 0.1 ± 0.1          | >25                                                      | >25    | >25    | >25  |
| 4{7,3}   | 11.00 ± 0.39                                | 12.52 ± 0.33 | 0 ± 0                                | 0.0 ± 0.0          | >25                                                      | >25    | >25    | 14   |
| 4{7,5}   | >15                                         | >15          | 43 ± 51                              | 0.2 ± 0.0          | >25                                                      | >25    | >25    | >25  |
| 4{7,8}   | >15                                         | >15          | 17 ± 29                              | 0.0 ± 0.0          | >25                                                      | >25    | >25    | >25  |

|         |              |              |            |             |     |     |     |     |
|---------|--------------|--------------|------------|-------------|-----|-----|-----|-----|
| 4{8,1}  | >15          | >15          | 59 ± 103   | 0.1 ± 0.0   | >25 | >25 | >25 | >25 |
| 4{8,2}  | >15          | >15          | 0 ± 0      | 0.3 ± 0.0   | >25 | >25 | >25 | >25 |
| 4{8,3}  | >15          | >15          | 107 ± 151  | 0.1 ± 0.0   | >25 | >25 | >25 | >25 |
| 4{8,4}  | >15          | >15          | 300 ± 339  | 0.4 ± 0.1   | >25 | >25 | >25 | >25 |
| 4{9,1}  | 11.22 ± 2.30 | 12.27 ± 1.93 | 3 ± 4      | 0.1 ± 0.0   | >25 | >25 | >25 | >25 |
| 4{9,2}  | >15          | >15          | 0 ± 0      | 0.1 ± 0.1   | >25 | >25 | >25 | >25 |
| 4{9,3}  | >15          | >15          | 24 ± 41    | 0.0 ± 0.0   | >25 | >25 | >25 | >25 |
| 4{9,4}  | >15          | >15          | 0 ± 0      | 0.0 ± 0.0   | >25 | >25 | >25 | >25 |
| 4{9,5}  | >15          | >15          | 0 ± 0      | 0.2 ± 0.0   | >25 | >25 | >25 | >25 |
| 4{9,6}  | 10.05 ± 6.43 | 7.70 ± 4.53  | 0 ± 0      | 0.0 ± 0.0   | >25 | 19  | 18  | >25 |
| 4{9,7}  | >15          | 9.97         | 2 ± 2      | 0.1 ± 0.0   | >25 | >25 | >25 | >25 |
| 4{10,1} | 13.82 ± 0.48 | 14.19        | 103 ± 121  | 0.1 ± 0.1   | >25 | >25 | >25 | >25 |
| 4{10,2} | >15          | >15          | 0 ± 0      | 0.1 ± 0.0   | >25 | >25 | >25 | >25 |
| 4{10,3} | >15          | 13.33        | 318 ± 107  | <0.31 ± 0.0 | >25 | >25 | >25 | >25 |
| 4{10,4} | >15          | >15          | 213 ± 217  | 0.1 ± 0.0   | >25 | >25 | >25 | 17  |
| 4{11,1} | >15          | >15          | 270 ± 81   | 0.0 ± 0.0   | >25 | >25 | >25 | >25 |
| 4{11,2} | >15          | >15          | 309 ± 269  | 0.2 ± 0.1   | >25 | >25 | >25 | >25 |
| 4{11,3} | >15          | >15          | 545 ± 256  | 0.1 ± 0.0   | >25 | >25 | >25 | >25 |
| 4{11,4} | >15          | >15          | 701 ± 111  | 0.3 ± 0.2   | >25 | >25 | >25 | >25 |
| 4{11,5} | 6.02 ± 1.95  | 11.01 ± 2.51 | 451 ± 31   | 0.7 ± 0.1   | >25 | >25 | >25 | >25 |
| 4{11,6} | >15          | >15          | 197 ± 95   | 0.1 ± 0.0   | >25 | >25 | >25 | >25 |
| 4{11,7} | >15          | 12.62        | 670 ± 693  | 0.2 ± 0.1   | >25 | >25 | >25 | >25 |
| 4{11,8} | >15          | >15          | 154 ± 135  | 0.2 ± 0.0   | >25 | >25 | >25 | >25 |
| 4{12,1} | >15          | >15          | 12 ± 21    | 0.3 ± 0.1   | >25 | >25 | >25 | >25 |
| 4{12,2} | >15          | >15          | 19 ± 23    | 0.3 ± 0.0   | >25 | >25 | >25 | >25 |
| 4{12,3} | >15          | >15          | 139 ± 24   | 3.2 ± 0.2   | >25 | >25 | >25 | >25 |
| 4{12,4} | >15          | >15          | 73 ± 65    | 1.7 ± 0.1   | >25 | >25 | >25 | >25 |
| 4{13,1} | 0.05 ± 0.02  | 0.39 ± 0.13  | 337 ± 131  | 0.3 ± 0.1   | >25 | >25 | >25 | >25 |
| 4{13,2} | 0.22 ± 0.09  | 1.57 ± 0.72  | 262 ± 161  | 0.3 ± 0.0   | >25 | >25 | >25 | >25 |
| 4{13,3} | 1.22 ± 0.83  | 3.12 ± 0.12  | 336 ± 44   | 0.4 ± 0.0   | 23  | 26  | >25 | >25 |
| 4{13,4} | 2.69 ±       | 6.71 ± 1.38  | 535 ± 34   | 3.3 ± 0.2   | >25 | 16  | 17  | >25 |
| 4{13,5} | 4.38 ± 1.31  | 6.90 ± 2.17  | 669 ± 144  | 1.3 ± 0.1   | >25 | >25 | >25 | >25 |
| 4{13,7} | 0.60 ± 0.55  | >15          | 566 ± 170  | 0.8 ± 0.0   | >25 | 21  | 19  | 18  |
| 4{13,8} | 0.90 ± 0.36  | 2.05 ± 0.82  | 197 ± 56   | 0.3 ± 0.1   | 23  | >25 | 17  | 10  |
| 4{13,9} | 1.05 ± 0.36  | 4.24 ± 0.11  | 6 ± 6      | 0.1 ± 0.0   | 20  | 10  | 16  | >25 |
| 4{14,1} | >15          | >15          | 0 ± 0      | 0.2 ± 0.1   | >25 | >25 | >25 | >25 |
| 4{14,2} | >15          | >15          | 0 ± 0      | 0.4 ± 0.1   | >25 | >25 | >25 | >25 |
| 4{14,3} | >15          | >15          | 405 ± 158  | 2.0 ± 0.1   | >25 | >25 | >25 | >25 |
| 4{14,4} | >15          | >15          | 193 ± 30   | 2.3 ± 0.2   | >25 | >25 | >25 | >25 |
| 4{15,1} | >15          | >15          | 394 ± 102  | 2.3 ± 0.2   | >25 | >25 | >25 | >25 |
| 4{15,2} | >15          | >15          | 1017 ± 200 | 22.2 ± 1.4  | >25 | >25 | >25 | >25 |
| 4{15,3} | >15          | >15          | 396 ± 53   | 61.3 ± 1.6  | >25 | >25 | >25 | >25 |
| 4{15,4} | >15          | >15          | 646 ± 43   | 62.1 ± 4.0  | >25 | >25 | >25 | >25 |
| 4{16,1} | 8.87 ± 2.59  | 11.70 ± 3.00 | 314 ± 79   | 0.8 ± 0.1   | >25 | >25 | >25 | >25 |
| 4{16,2} | 7.84 ± 5.84  | 15.48 ± 1.96 | 118 ± 24   | 3.8 ± 0.1   | >25 | >25 | >25 | >25 |
| 4{16,3} | >15          | 10.51 ± 2.94 | 78 ± 15    | 22.4 ± 6.0  | >25 | >25 | >25 | 13  |
| 4{16,4} | >15          | >15          | 722 ± 280  | 58.4 ± 3.5  | >25 | >25 | >25 | >25 |
| 4{16,6} | >15          | >15          | 334 ± 67   | 55.1 ± 9.3  | >25 | >25 | >25 | >25 |
| 4{16,6} | 8.07 ± 0.50  | >15          | 273 ± 64   | 55.7 ± 3.5  | >25 | >25 | >25 | >25 |
| 4{16,7} | >15          | >15          | 397 ± 41   | 48.7 ± 15.5 | >25 | >25 | >25 | >25 |
| 4{16,8} | 3.38 ± 0.78  | 10.22        | 74 ± 37    | 0.4 ± 0.0   | >25 | >25 | >25 | >25 |

|         |              |              |            |             |     |     |     |     |
|---------|--------------|--------------|------------|-------------|-----|-----|-----|-----|
| 4{17,1} | >15          | >15          | 51 ± 89    | 0.3 ± 0.1   | >25 | >25 | >25 | >25 |
| 4{17,3} | 8.54 ± 2.83  | 10.58 ± 5.20 | 26 ± 33    | 0.7 ± 0.1   | >25 | >25 | >25 | >25 |
| 4{17,4} | >15          | >15          | 236 ± 27   | 2.1 ± 0.0   | >25 | >25 | >25 | >25 |
| 4{17,4} | >15          | >15          | 897 ± 221  | 4.1 ± 0.1   | >25 | >25 | >25 | >25 |
| 4{17,7} | >15          | >15          | 525 ± 156  | 1.7 ± 0.2   | >25 | >25 | >25 | >25 |
| 4{17,8} | >15          | >15          | 24 ± 42    | 1.2 ± 0.6   | >25 | >25 | >25 | >25 |
| 4{18,1} | 11.23 ± 3.19 | >15          | 242 ± 58   | 2.1 ± 0.1   | >25 | >25 | >25 | >25 |
| 4{18,2} | 13.78 ± 0.20 | 12.13        | 185 ± 52   | 0.7 ± 0.0   | >25 | >25 | >25 | 20  |
| 4{18,3} | 13.26 ± 0.55 | 11.92        | 146 ± 19   | 1.2 ± 0.3   | >25 | >25 | >25 | >25 |
| 4{18,4} | 13.46 ± 0.95 | 14.19 ± 2.06 | 60 ± 54    | 0.0 ± 0.0   | >25 | >25 | >25 | 19  |
| 4{19,1} | >15          | >15          | 465 ± 70   | 6.0 ± 0.2   | >25 | >25 | >25 | >25 |
| 4{19,2} | 10.32 ± 1.87 | >15          | 1565 ± 321 | 14.5 ± 1.1  | >25 | >25 | >25 | >25 |
| 4{19,3} | >15          | >15          | 820 ± 111  | 42.4 ± 0.3  | >25 | >25 | >25 | >25 |
| 4{19,4} | >15          | >15          | 1032 ± 63  | 27.6 ± 3.1  | >25 | >25 | >25 | >25 |
| 4{19,5} | >15          | >15          | 588 ± 70   | 49.6 ± 1.8  | >25 | >25 | >25 | >25 |
| 4{19,7} | >15          | >15          | 129 ± 167  | <0.42 ± 0.0 | >25 | >25 | >25 | >25 |
| 4{19,8} | >15          | >15          | 381 ± 84   | 51.2 ± 1.8  | >25 | >25 | >25 | >25 |
| 4{19,9} | >15          | >15          | 401 ±      | 3.4 ± 0.2   | >25 | >25 | >25 | >25 |
| 4{20,1} | >15          | >15          | 17 ± 30    | 0.5 ± 0.0   | >25 | >25 | >25 | >25 |
| 4{20,2} | >15          | 14.46        | 643 ± 280  | 2.4 ± 0.4   | >25 | >25 | >25 | >25 |
| 4{20,3} | >15          | >15          | 544 ± 40   | 27.5 ± 3.0  | >25 | >25 | >25 | >25 |
| 4{20,4} | >15          | >15          | 701 ± 165  | 0.2 ± 0.0   | >25 | >25 | >25 | >25 |

<sup>a</sup> Values are means of two independent experiments done in triplicate.

**Table 3.** Summary of 4-aminoquinaldine-derived diaryl ureas **4**{13, 1-60}

| Compound | R2 (B ring)                                  | EC <sub>50</sub> /uM <sup>a</sup> |              | Permeability<br>(Pe, 10-<br>6cm/s) | Solubility<br>(uM) | Cytotoxicity<br>LD <sub>50</sub> (uM) <sup>a</sup> |            |           |      |
|----------|----------------------------------------------|-----------------------------------|--------------|------------------------------------|--------------------|----------------------------------------------------|------------|-----------|------|
|          |                                              | 3D7                               | K1           |                                    |                    | BJ                                                 | HEK<br>293 | HepG<br>2 | Raji |
| 4{13,1}  | 3-Cl-6-OMe-phenyl                            | 0.053 ± 0.02                      | 0.39 ± 0.13  | 337 ± 131                          | 0.3 ± 0.1          | >25                                                | >25        | >25       | >25  |
| 4{13,2}  | 3-Cl-4-Me-phenyl                             | 0.22 ± 0.09                       | 1.57 ± 0.72  | 262 ± 161                          | 0.3 ± 0.0          | >25                                                | >25        | >25       | >25  |
| 4{13,3}  | 3-Cl-4-OMe-phenyl                            | 1.22 ± 0.83                       | 3.12 ± 0.12  | 336 ± 44                           | 0.4 ± 0.0          | 23                                                 | 26         | >25       | >25  |
| 4{13,4}  | 4-Et-phenyl                                  | 2.69                              | 6.71 ± 1.38  | 535 ± 34                           | 3.3 ± 0.2          | >25                                                | 16         | 17        | >25  |
| 4{13,5}  | 4-Me-phenyl                                  | 4.38 ± 1.31                       | 6.90 ± 2.17  | 669 ± 144                          | 1.3 ± 0.1          | >25                                                | >25        | >25       | >25  |
| 4{13,7}  | 3-Cl-phenyl                                  | 0.60 ± 0.55                       | >15          | 566 ± 170                          | 0.8 ± 0.0          | >25                                                | 21         | 19        | 18   |
| 4{13,8}  | 3,4-Cl <sub>2</sub> phenyl                   | 0.90 ± 0.36                       | 2.05 ± 0.82  | 197 ± 56                           | 0.3 ± 0.1          | 23                                                 | >25        | 17        | 10   |
| 4{13,9}  | 2,4-Cl <sub>2</sub> phenyl                   | 1.05 ± 0.36                       | 4.24 ± 0.11  | 6 ± 6                              | 0.1 ± 0.0          | 20                                                 | 10         | 16        | >25  |
| 4{13,10} | 4-Cl-phenyl                                  | 2.76 ± 1.81                       | 6.80 ± 0.54  | 537 ± 53                           | 1.4 ± 0.1          | >25                                                | >25        | >25       | >25  |
| 4{13,11} | 3,5-Cl <sub>2</sub> -phenyl                  | 2.07                              | 6.17         | 0 ± 0                              | 0.8 ± 0.1          | >25                                                | >25        | >25       | >25  |
| 4{13,12} | 4-Cl-3-CF <sub>3</sub> -phenyl               | 0.47 ± 0.49                       | 2.76 ± 0.91  | 63 ± 20                            | 1.3 ± 0.1          | 25                                                 | >25        | >25       | >25  |
| 4{13,13} | 2-F-phenyl                                   | 1.89 ± 1.42                       | 0.69         | 817 ± 75                           | 3.8 ± 0.2          | >25                                                | >25        | >25       | >25  |
| 4{13,14} | 3-F-phenyl                                   | 2.43 ± 2.57                       | >15          | 0 ± 1                              | 0.1 ± 0.0          | >25                                                | >25        | >25       | >25  |
| 4{13,15} | 4-F-phenyl                                   | 2.19 ± 1.74                       | 4.72 ± 0.09  | 801 ± 166                          | 3.7 ± 0.0          | >25                                                | >25        | >25       | >25  |
| 4{13,16} | 2,4-F <sub>2</sub> -phenyl                   | 0.94 ± 0.21                       | 4.95 ± 1.59  | 640 ± 121                          | 3.0 ± 0.2          | 20                                                 | 10         | 17        | >25  |
| 4{13,17} | 2,5-F <sub>2</sub> -phenyl                   | 0.69 ± 0.17                       | 1.64 ± 0.03  | 541 ± 120                          | 0.5 ± 0.2          | 7                                                  | 12         | >25       | >25  |
| 4{13,18} | 3,4-F <sub>2</sub> -phenyl                   | 1.30 ± 0.93                       | 3.66 ± 1.84  | 478 ± 237                          | 0.5 ± 0.3          | >25                                                | >25        | 21        | >25  |
| 4{13,19} | 3,5-F <sub>2</sub> -phenyl                   | 3.37 ± 1.46                       | 1.89         | 0 ± 0                              | 0.3 ± 0.0          | >25                                                | >25        | >25       | >25  |
| 4{13,20} | 3-F-4-OMe-phenyl                             | 2.37 ± 1.58                       | 4.62 ± 1.49  | 50 ± 24                            | 2.7 ± 0.2          | 26                                                 | >25        | >25       | >25  |
| 4{13,21} | 3-Me-phenyl                                  | 2.15 ± 0.04                       | 10.05 ± 1.15 | 4 ± 3                              | 0.3 ± 0.0          | >25                                                | >25        | >25       | >25  |
| 4{13,22} | 2-tBu-phenyl                                 | 1.54 ± 0.21                       | 3.00 ± 0.57  | 27 ± 25                            | 0.1 ± 0.0          | 22                                                 | >25        | >25       | >25  |
| 4{13,23} | 3-tBu-phenyl                                 | >15                               | >15          | 555 ± 40                           | 34.7 ± 0.0         | >25                                                | >25        | >25       | >25  |
| 4{13,24} | 4-tBu-phenyl                                 | 2.03 ± 0.02                       | 3.34 ± 0.37  | 142 ±                              | 6.2 ± 0.0          | 20                                                 | >25        | 17        | >25  |
| 4{13,25} | 2-CF <sub>3</sub> -phenyl                    | >15                               | >15          | 945 ± 54                           | 3.8 ± 0.3          | >25                                                | >25        | >25       | >25  |
| 4{13,26} | 3-CF <sub>3</sub> -phenyl                    | 0.32                              | >15          | 0 ± 0                              | 0.1 ± 0.0          | >25                                                | 16         | 21        | 10   |
| 4{13,27} | 4-CF <sub>3</sub> -phenyl                    | 1.49 ± 0.76                       | 2.61 ± 0.64  | 2 ± 2                              | 0.1 ± 0.0          | >25                                                | 25         | 23        | 23   |
| 4{13,28} | 3-CF <sub>3</sub> -4-NO <sub>2</sub> -phenyl | 1.97                              | >15          | 45 ± 39                            | 0.0 ± 0.0          | >25                                                | >25        | >25       | >25  |
| 4{13,29} | 2-OMe-phenyl                                 | 2.05 ± 1.01                       | 6.90 ± 1.16  | 0 ± 0                              | 0.1 ± 0.0          | >25                                                | >25        | >25       | >25  |
| 4{13,30} | 3-OMe-phenyl                                 | 2.01 ± 1.17                       | 4.74 ± 1.50  | 818 ± 125                          | 1.2 ± 0.1          | 27                                                 | >25        | >25       | >25  |
| 4{13,31} | 4-OMe-phenyl                                 | 5.38 ± 1.76                       | 6.84 ± 0.16  | 787 ± 61                           | 19.8 ± 0.9         | >25                                                | >25        | >25       | >25  |
| 4{13,32} | 3,4-(OMe) <sub>2</sub> -phenyl               | 5.67 ± 0.61                       | 7.04 ± 0.80  | 552 ± 46                           | 4.1 ± 0.3          | >25                                                | >25        | >25       | >25  |
| 4{13,33} | 2-OCF <sub>3</sub> -phenyl                   | 3.41 ± 2.37                       | 5.00 ± 1.73  | 1107 ± 227                         | 4.6 ± 0.3          | >25                                                | >25        | >25       | >25  |
| 4{13,34} | 3-OCF <sub>3</sub> -phenyl                   | 1.04 ± 1.00                       | 2.75 ± 0.83  | 464 ± 73                           | 0.6 ± 0.0          | 25                                                 | 22         | 13        | 9    |
| 4{13,35} | 4-OCF <sub>3</sub> -phenyl                   | 2.63 ± 1.19                       | 4.85 ± 0.95  | 531 ± 98                           | 0.3 ± 0.0          | 25                                                 | 14         | 15        | 10   |
| 4{13,36} | 2-SMe-phenyl                                 | 6.10 ± 1.06                       | 7.31 ± 1.03  | 1259 ± 266                         | 21.0 ± 1.1         | >25                                                | >25        | >25       | >25  |
| 4{13,37} | 4-SMe-phenyl                                 | 3.13 ± 1.77                       | 6.98 ± 0.65  | 473 ± 47                           | 1.3 ± 0.1          | >25                                                | 24         | 16        | >25  |
| 4{13,38} | 4-SCF <sub>3</sub> -phenyl                   | 2.86 ± 2.76                       | 4.33 ± 1.90  | 206 ± 50                           | 0.2 ± 0.0          | >25                                                | 13         | 20        | 10   |
| 4{13,39} | 3-NMe <sub>2</sub> -phenyl                   | 0.031 ± 0.02                      | 0.11 ± 0.09  | 0 ± 0                              | 0.0 ± 0.0          | >25                                                | >25        | >25       | >25  |
| 4{13,40} | 4-NMe <sub>2</sub> -phenyl                   | 5.61 ± 0.39                       | 7.80 ± 2.47  | 2 ± 2                              | 0.0 ± 0.0          | >25                                                | >25        | >25       | >25  |
| 4{13,41} | 2-NO <sub>2</sub> -phenyl                    | 1.81 ± 2.24                       | 6.59         | 204 ± 55                           | 0.2 ± 0.0          | >25                                                | >25        | >25       | >25  |
| 4{13,42} | 3-NO <sub>2</sub> -phenyl                    | 2.54 ± 1.80                       | >15          | 42 ± 38                            | 0.0 ± 0.0          | >25                                                | >25        | >25       | >25  |
| 4{13,43} | 4-OH-phenyl                                  | >15                               | >15          | 3 ± 6                              | 0.1 ± 0.0          | >25                                                | >25        | >25       | >25  |
| 4{13,44} | 2-NH <sub>2</sub> -phenyl                    | >15                               | >15          | 300 ± 168                          | 51.8 ± 3.4         | >25                                                | >25        | >25       | >25  |
| 4{13,45} | 4-NH <sub>2</sub> -phenyl                    | 10.16                             | 8.78         | 530 ± 27                           | 18.5 ± 0.6         | >25                                                | >25        | >25       | >25  |
| 4{13,46} | 4-COMe-phenyl                                | 4.42 ± 0.12                       | 6.77 ± 0.66  | 473 ± 93                           | 3.8 ± 1.6          | 22                                                 | >25        | 19        | >25  |

|          |                             |              |              |           |            |     |     |     |     |
|----------|-----------------------------|--------------|--------------|-----------|------------|-----|-----|-----|-----|
| 4{13,47} | 3-COOMe-phenyl              | >15          | 8.17 ± 1.35  | 746 ± 231 | 0.6 ± 0.0  | 21  | 26  | 23  | 26  |
| 4{13,48} | 4-COOMe-phenyl              | 7.18 ± 1.27  | 6.16 ± 0.18  | 448 ± 46  | 1.2 ± 0.0  | 21  | 15  | 20  | 17  |
| 4{13,49} | 2-CONH <sub>2</sub> -phenyl | >15          | >15          | 0 ± 0     | 0.2 ± 0.0  | >25 | >25 | >25 | >25 |
| 4{13,50} | 3-CONH <sub>2</sub> -phenyl | 13.13 ± 0.54 | >15          | 2 ± 3     | 0.1 ± 0.0  | >25 | >25 | >25 | >25 |
| 4{13,51} | 4-CONH <sub>2</sub> -phenyl | 10.73 ± 1.66 | 5.48 ± 1.82  | 0 ± 0     | 0.9 ± 0.0  | >25 | >25 | >25 | >25 |
| 4{13,52} | 4-COOH-phenyl               | >15          | >15          | 0 ± 0     | 9.3 ± 1.9  | >25 | >25 | >25 | >25 |
| 4{13,53} | 2-COOH-4-F-phenyl           | >15          | >15          | 5 ± 1     | 44.3 ± 3.0 | >25 | >25 | >25 | >25 |
| 4{13,54} | 3-OH-4-COOH-phenyl          | >15          | >15          | 0 ± 0     | 26.6 ± 1.7 | >25 | >25 | >25 | >25 |
| 4{13,55} | pyridin-3-yl                | 3.42 ± 1.08  | 6.20 ± 4.28  | 63 ± 6    | 0.0 ± 0.9  | >25 | >25 | >25 | >25 |
| 4{13,56} | 3-Me-pyridin-2-yl           | >15          | >15          | 369 ± 49  | 1.3 ± 0.0  | >25 | >25 | >25 | >25 |
| 4{13,57} | quinolin-3-yl               | 2.95 ± 1.54  | 6.021 ± 3.04 | 46 ± 1    | 0.4 ± 0.0  | >25 | >25 | >25 | >25 |
| 4{13,58} | benzothiadiazol-4-yl        | 0.016 ± 0.01 | 0.08         | 155 ± 36  | 0.3 ± 0.0  | >25 | >25 | >25 | >25 |
| 4{13,59} | benzodioxol-5-yl            | 5.08 ± 3.53  | 10.10 ± 2.35 | 266 ± 124 | 1.6 ± 0.1  | >25 | >25 | >25 | >25 |
| 4{13,60} | benzimidazol-5-yl           | 1.09 ± 0.27  | 1.70 ± 0.31  | 2 ± 3     | 7.3 ± 0.0  | >25 | >25 | >25 | >25 |

<sup>a</sup> Values are means of two independent experiments done in triplicate.



**Table 4.** Inhibition summary of diarylurea 4{13, 34}in competition kinase binding assay.

| Ambit Gene Symbol | Entrez Gene Symbol | %ctrl <sup>a</sup> | Ambit Gene Symbol | Entrez Gene Symbol | %ctrl <sup>a</sup> |
|-------------------|--------------------|--------------------|-------------------|--------------------|--------------------|
| AAK1              | AAK1               | 100                | MAP3K1            | MAP3K1             | 100                |
| ABL1              | ABL1               | 100                | MAP3K15           | MAP3K15            | 100                |
| ABL1(E255K)       | ABL1               | 100                | MAP3K2            | MAP3K2             | 100                |
| ABL1(F317I)       | ABL1               | 100                | MAP3K3            | MAP3K3             | 100                |
| ABL1(F317L)       | ABL1               | 100                | MAP3K4            | MAP3K4             | 100                |
| ABL1(H396P)       | ABL1               | 100                | MAP4K2            | MAP4K2             | 100                |
| ABL1(M351T)       | ABL1               | 100                | MAP4K3            | MAP4K3             | 100                |
| ABL1(Q252H)       | ABL1               | 100                | MAP4K4            | MAP4K4             | 99                 |
| ABL1(T315I)       | ABL1               | 100                | MAP4K5            | MAP4K5             | 100                |
| ABL1(Y253F)       | ABL1               | 100                | MAPKAPK2          | MAPKAPK2           | 96                 |
| ABL2              | ABL2               | 100                | MAPKAPK5          | MAPKAPK5           | 100                |
| ACVR1             | ACVR1              | 100                | MARK1             | MARK1              | 100                |
| ACVR1B            | ACVR1B             | 100                | MARK2             | MARK2              | 100                |
| ACVR2A            | ACVR2A             | 100                | MARK3             | MARK3              | 100                |
| ACVR2B            | ACVR2B             | 100                | MARK4             | MARK4              | 100                |
| ACVRL1            | ACVRL1             | 100                | MAST1             | MAST1              | 96                 |
| ADCK3             | CABC1              | 100                | MEK1              | MAP2K1             | 100                |
| ADCK4             | ADCK4              | 100                | MEK2              | MAP2K2             | 100                |
| AKT1              | AKT1               | 100                | MEK3              | MAP2K3             | 100                |
| AKT2              | AKT2               | 100                | MEK4              | MAP2K4             | 100                |
| AKT3              | AKT3               | 100                | MEK6              | MAP2K6             | 98                 |
| ALK               | ALK                | 99                 | MELK              | MELK               | 94                 |
| AMPK-alpha1       | PRKAA1             | 100                | MERTK             | MERTK              | 100                |
| AMPK-alpha2       | PRKAA2             | 100                | MET               | MET                | 100                |
| ANKK1             | ANKK1              | 100                | MET(M1250T)       | MET                | 100                |
| ARK5              | NUAK1              | 100                | MET(Y1235D)       | MET                | 86                 |
| ASK1              | MAP3K5             | 100                | MINK              | MINK1              | 100                |
| ASK2              | MAP3K6             | 100                | MKNK1             | MKNK1              | 100                |
| AURKA             | AURKA              | 100                | MKNK2             | MKNK2              | 100                |
| AURKB             | AURKB              | 92                 | MLCK              | MLCK               | 99                 |
| AURKC             | AURKC              | 88                 | MLK1              | MAP3K9             | 100                |
| AXL               | AXL                | 100                | MLK2              | MAP3K10            | 100                |
| BIKE              | BMP2K              | 100                | MLK3              | MAP3K11            | 100                |
| BLK               | BLK                | 99                 | MRCKA             | CDC42BPA           | 100                |
| BMPR1A            | BMPR1A             | 100                | MRCKB             | CDC42BPB           | 100                |
| BMPR1B            | BMPR1B             | 97                 | MST1              | STK4               | 100                |
| BMPR2             | BMPR2              | 100                | MST1R             | MST1R              | 90                 |
| BMX               | BMX                | 100                | MST2              | STK3               | 100                |
| BRAF              | BRAF               | 99                 | MST3              | STK24              | 100                |
| BRAF(V600E)       | BRAF               | 100                | MST4              | MST4               | 100                |
| BRK               | PTK6               | 100                | MUSK              | MUSK               | 98                 |
| BRSK1             | BRSK1              | 100                | MYLK              | MYLK               | 100                |
| BRSK2             | BRSK2              | 100                | MYLK2             | MYLK2              | 100                |
| BTK               | BTK                | 100                | MYO3A             | MYO3A              | 100                |
| CAMK1             | CAMK1              | 100                | MYO3B             | MYO3B              | 95                 |
| CAMK1D            | CAMK1D             | 100                | NDR1              | STK38              | 100                |
| CAMK1G            | CAMK1G             | 100                | NDR2              | STK38L             | 100                |
| CAMK2A            | CAMK2A             | 100                | NEK1              | NEK1               | 100                |

|          |          |     |
|----------|----------|-----|
| CAMK2B   | CAMK2B   | 100 |
| CAMK2D   | CAMK2D   | 100 |
| CAMK2G   | CAMK2G   | 100 |
| CAMK4    | CAMK4    | 100 |
| CAMKK1   | CAMKK1   | 100 |
| CAMKK2   | CAMKK2   | 100 |
| CDC2L1   | CDC2L1   | 86  |
| CDC2L2   | CDC2L2   | 91  |
| CDK11    | CDC2L6   | 100 |
| CDK2     | CDK2     | 100 |
| CDK3     | CDK3     | 95  |
| CDK5     | CDK5     | 100 |
| CDK7     | CDK7     | 100 |
| CDK8     | CDK8     | 100 |
| CDK9     | CDK9     | 98  |
| CDKL2    | CDKL2    | 87  |
| CDKL3    | CDKL3    | 100 |
| CDKL5    | CDKL5    | 69  |
| CHEK1    | CHEK1    | 100 |
| CHEK2    | CHEK2    | 100 |
| CIT      | CIT      | 82  |
| CLK1     | CLK1     | 93  |
| CLK2     | CLK2     | 100 |
| CLK3     | CLK3     | 91  |
| CLK4     | CLK4     | 98  |
| CSF1R    | CSF1R    | 100 |
| CSK      | CSK      | 100 |
| CSNK1A1L | CSNK1A1L | 100 |
| CSNK1D   | CSNK1D   | 96  |
| CSNK1E   | CSNK1E   | 100 |
| CSNK1G1  | CSNK1G1  | 100 |
| CSNK1G2  | CSNK1G2  | 100 |
| CSNK1G3  | CSNK1G3  | 98  |
| CSNK2A1  | CSNK2A1  | 100 |
| CSNK2A2  | CSNK2A2  | 100 |
| CTK      | MATK     | 100 |
| DAPK1    | DAPK1    | 100 |
| DAPK2    | DAPK2    | 100 |
| DAPK3    | DAPK3    | 100 |
| DCAMKL1  | DCLK1    | 100 |
| DCAMKL2  | DCLK2    | 93  |
| DCAMKL3  | DCLK3    | 100 |
| DDR1     | DDR1     | 0.3 |
| DDR2     | DDR2     | 84  |
| DLK      | MAP3K12  | 96  |
| DMPK     | DMPK     | 100 |
| DMPK2    | CDC42BPG | 100 |
| DRAK1    | STK17A   | 73  |
| DRAK2    | STK17B   | 85  |
| DYRK1A   | DYRK1A   | 100 |
| DYRK1B   | DYRK1B   | 99  |
| DYRK2    | DYRK2    | 100 |
| EGFR     | EGFR     | 100 |

|                |          |     |
|----------------|----------|-----|
| NEK2           | NEK2     | 100 |
| NEK5           | NEK5     | 99  |
| NEK6           | NEK6     | 100 |
| NEK7           | NEK7     | 100 |
| NEK9           | NEK9     | 100 |
| NIM1           | MGC42105 | 100 |
| NLK            | NLK      | 100 |
| OSR1           | OXSRI    | 100 |
| p38-alpha      | MAPK14   | 100 |
| p38-beta       | MAPK11   | 100 |
| p38-delta      | MAPK13   | 79  |
| p38-gamma      | MAPK12   | 100 |
| PAK1           | PAK1     | 100 |
| PAK2           | PAK2     | 100 |
| PAK3           | PAK3     | 100 |
| PAK4           | PAK4     | 100 |
| PAK6           | PAK6     | 100 |
| PAK7           | PAK7     | 100 |
| PCTK1          | PCTK1    | 100 |
| PCTK2          | PCTK2    | 96  |
| PCTK3          | PCTK3    | 99  |
| PDGFRA         | PDGFRA   | 97  |
| PDGFRB         | PDGFRB   | 71  |
| PDPK1          | PDPK1    | 100 |
| PFTAIRE2       | PFTK2    | 100 |
| PFTK1          | PFTK1    | 79  |
| PHKG1          | PHKG1    | 92  |
| PHKG2          | PHKG2    | 100 |
| PIK3C2B        | PIK3C2B  | 100 |
| PIK3C2G        | PIK3C2G  | 100 |
| PIK3CA         | PIK3CA   | 100 |
| PIK3CA(C420R)  | PIK3CA   | 100 |
| PIK3CA(E542K)  | PIK3CA   | 100 |
| PIK3CA(E545A)  | PIK3CA   | 99  |
| PIK3CA(E545K)  | PIK3CA   | 100 |
| PIK3CA(H1047L) | PIK3CA   | 100 |
| PIK3CA(H1047Y) | PIK3CA   | 100 |
| PIK3CA(M1043I) | PIK3CA   | 100 |
| PIK3CA(Q546K)  | PIK3CA   | 100 |
| PIK3CB         | PIK3CB   | 79  |
| PIK3CD         | PIK3CD   | 97  |
| PIK3CG         | PIK3CG   | 100 |
| PIK4CB         | PI4KB    | 91  |
| PIM1           | PIM1     | 100 |
| PIM2           | PIM2     | 100 |
| PIM3           | PIM3     | 100 |
| PIP5K1A        | PIP5K1A  | 100 |
| PIP5K2B        | PIP4K2B  | 78  |
| PKAC-alpha     | PRKACA   | 100 |
| PKAC-beta      | PRKACB   | 100 |
| PKMYT1         | PKMYT1   | 100 |
| PKN1           | PKN1     | 100 |
| PKN2           | PKN2     | 100 |

|                           |        |     |                               |           |     |
|---------------------------|--------|-----|-------------------------------|-----------|-----|
| EGFR(E746-A750del)        | EGFR   | 93  | PLK1                          | PLK1      | 100 |
| EGFR(G719C)               | EGFR   | 89  | PLK2                          | PLK2      | 100 |
| EGFR(G719S)               | EGFR   | 99  | PLK3                          | PLK3      | 100 |
| EGFR(L747-E749del, A750P) | EGFR   | 100 | PLK4                          | PLK4      | 88  |
| EGFR(L747-S752del, P753S) | EGFR   | 100 | PRKCD                         | PRKCD     | 100 |
| EGFR(L747-T751del,Sins)   | EGFR   | 95  | PRKCE                         | PRKCE     | 100 |
| EGFR(L858R)               | EGFR   | 100 | PRKCH                         | PRKCH     | 100 |
| EGFR(L858R,T790M)         | EGFR   | 100 | PRKCQ                         | PRKCQ     | 100 |
| EGFR(L861Q)               | EGFR   | 100 | PRKD1                         | PRKD1     | 100 |
| EGFR(S752-I759del)        | EGFR   | 84  | PRKD2                         | PRKD2     | 100 |
| EPHA1                     | EPHA1  | 100 | PRKD3                         | PRKD3     | 100 |
| EPHA2                     | EPHA2  | 100 | PRKG1                         | PRKG1     | 94  |
| EPHA3                     | EPHA3  | 100 | PRKG2                         | PRKG2     | 100 |
| EPHA4                     | EPHA4  | 100 | PRKR                          | EIF2AK2   | 100 |
| EPHA5                     | EPHA5  | 100 | PRKX                          | PRKX      | 97  |
| EPHA6                     | EPHA6  | 38  | PRP4                          | PRPF4B    | 100 |
| EPHA7                     | EPHA7  | 79  | PYK2                          | PTK2B     | 100 |
| EPHA8                     | EPHA8  | 99  | QSK                           | KIAA0999  | 100 |
| EPHB1                     | EPHB1  | 100 | RAF1                          | RAF1      | 100 |
| EPHB2                     | EPHB2  | 94  | RET                           | RET       | 100 |
| EPHB3                     | EPHB3  | 88  | RET(M918T)                    | RET       | 100 |
| EPHB4                     | EPHB4  | 85  | RET(V804L)                    | RET       | 100 |
| EPHB6                     | EPHB6  | 100 | RET(V804M)                    | RET       | 95  |
| ERBB2                     | ERBB2  | 100 | RIOK1                         | RIOK1     | 98  |
| ERBB3                     | ERBB3  | 100 | RIOK2                         | RIOK2     | 100 |
| ERBB4                     | ERBB4  | 100 | RIOK3                         | RIOK3     | 100 |
| ERK1                      | MAPK3  | 100 | RIPK1                         | RIPK1     | 100 |
| ERK2                      | MAPK1  | 100 | RIPK2                         | RIPK2     | 96  |
| ERK3                      | MAPK6  | 100 | RIPK4                         | RIPK4     | 81  |
| ERK4                      | MAPK4  | 98  | ROCK1                         | ROCK1     | 100 |
| ERK5                      | MAPK7  | 92  | ROCK2                         | ROCK2     | 100 |
| ERK8                      | MAPK15 | 100 | ROS1                          | ROS1      | 100 |
| ERN1                      | ERN1   | 100 | RPS6KA1(Kin.Dom.1-N-terminal) | RPS6KA1   | 90  |
| FAK                       | PTK2   | 99  | RPS6KA1(Kin.Dom.2-C-terminal) | RPS6KA1   | 100 |
| FER                       | FER    | 100 | RPS6KA2(Kin.Dom.1-N-terminal) | RPS6KA2   | 100 |
| FES                       | FES    | 100 | RPS6KA2(Kin.Dom.2-C-terminal) | RPS6KA2   | 100 |
| FGFR1                     | FGFR1  | 100 | RPS6KA3(Kin.Dom.1-N-terminal) | RPS6KA3   | 100 |
| FGFR2                     | FGFR2  | 100 | RPS6KA4(Kin.Dom.1-N-terminal) | RPS6KA4   | 100 |
| FGFR3                     | FGFR3  | 100 | RPS6KA4(Kin.Dom.2-C-terminal) | RPS6KA4   | 98  |
| FGFR3(G697C)              | FGFR3  | 100 | RPS6KA5(Kin.Dom.1-N-terminal) | RPS6KA5   | 100 |
| FGFR4                     | FGFR4  | 100 | RPS6KA5(Kin.Dom.2-C-terminal) | RPS6KA5   | 100 |
| FGR                       | FGR    | 100 | RPS6KA6(Kin.Dom.1-N-terminal) | RPS6KA6   | 98  |
| FLT1                      | FLT1   | 100 | RPS6KA6(Kin.Dom.2-C-terminal) | RPS6KA6   | 100 |
| FLT3                      | FLT3   | 92  | SBK1                          | SBK1      | 100 |
| FLT3(D835H)               | FLT3   | 91  | SgK085                        | LOC340156 | 95  |
| FLT3(D835Y)               | FLT3   | 84  | SgK110                        | SgK110    | 98  |
| FLT3(ITD)                 | FLT3   | 100 | SIK                           | SNF1LK    | 98  |
| FLT3(K663Q)               | FLT3   | 80  | SIK2                          | SNF1LK2   | 100 |
| FLT3(N841I)               | FLT3   | 86  | SLK                           | SLK       | 100 |
| FLT4                      | FLT4   | 100 | SNARK                         | NUAK2     | 100 |
| FRK                       | FRK    | 97  | SRC                           | SRC       | 100 |
| FYN                       | FYN    | 100 | SRMS                          | SRMS      | 94  |
| GAK                       | GAK    | 100 | SRPK1                         | SRPK1     | 100 |

|                              |         |     |                              |        |     |
|------------------------------|---------|-----|------------------------------|--------|-----|
| GCN2(Kin.Dom.2,S808G)        | EIF2AK4 | 100 | SRPK2                        | SRPK2  | 93  |
| GRK1                         | GRK1    | 100 | SRPK3                        | SRPK3  | 87  |
| GRK4                         | GRK4    | 85  | STK16                        | STK16  | 100 |
| GRK7                         | GRK7    | 100 | STK33                        | STK33  | 92  |
| GSK3A                        | GSK3A   | 100 | STK35                        | STK35  | 100 |
| GSK3B                        | GSK3B   | 100 | STK36                        | STK36  | 100 |
| HCK                          | HCK     | 100 | STK39                        | STK39  | 84  |
| HIPK1                        | HIPK1   | 100 | SYK                          | SYK    | 100 |
| HIPK2                        | HIPK2   | 100 | TAK1                         | MAP3K7 | 100 |
| HIPK3                        | HIPK3   | 100 | TAO1                         | TAOK2  | 100 |
| HIPK4                        | HIPK4   | 100 | TAOK1                        | TAOK1  | 100 |
| HPK1                         | MAP4K1  | 100 | TAOK3                        | TAOK3  | 100 |
| HUNK                         | HUNK    | 100 | TBK1                         | TBK1   | 100 |
| ICK                          | ICK     | 95  | TEC                          | TEC    | 97  |
| IGF1R                        | IGF1R   | 98  | TESK1                        | TESK1  | 100 |
| IKK-alpha                    | CHUK    | 100 | TGFBR1                       | TGFBR1 | 100 |
| IKK-beta                     | IKBKB   | 81  | TGFBR2                       | TGFBR2 | 100 |
| IKK-epsilon                  | IKBKE   | 100 | TIE1                         | TIE1   | 100 |
| INSR                         | INSR    | 99  | TIE2                         | TEK    | 100 |
| INSRR                        | INSRR   | 100 | TLK1                         | TLK1   | 100 |
| IRAK1                        | IRAK1   | 47  | TLK2                         | TLK2   | 100 |
| IRAK3                        | IRAK3   | 100 | TNIK                         | TNIK   | 100 |
| ITK                          | ITK     | 100 | TNK1                         | TNK1   | 100 |
| JAK1(JH1domain-catalytic)    | JAK1    | 100 | TNK2                         | TNK2   | 100 |
| JAK1(JH2domain-pseudokinase) | JAK1    | 94  | TNNI3K                       | TNNI3K | 100 |
| JAK2(JH1domain-catalytic)    | JAK2    | 100 | TRKA                         | NTRK1  | 100 |
| JAK3(JH1domain-catalytic)    | JAK3    | 100 | TRKB                         | NTRK2  | 100 |
| JNK1                         | MAPK8   | 87  | TRKC                         | NTRK3  | 100 |
| JNK2                         | MAPK9   | 100 | TSSK1B                       | TSSK1B | 100 |
| JNK3                         | MAPK10  | 100 | TTK                          | TTK    | 92  |
| KIT                          | KIT     | 88  | TXK                          | TXK    | 100 |
| KIT(D816V)                   | KIT     | 100 | TYK2(JH1domain-catalytic)    | TYK2   | 97  |
| KIT(L576P)                   | KIT     | 96  | TYK2(JH2domain-pseudokinase) | TYK2   | 100 |
| KIT(V559D)                   | KIT     | 87  | TYRO3                        | TYRO3  | 91  |
| KIT(V559D,T670I)             | KIT     | 96  | ULK1                         | ULK1   | 100 |
| KIT(V559D,V654A)             | KIT     | 98  | ULK2                         | ULK2   | 100 |
| LATS1                        | LATS1   | 86  | ULK3                         | ULK3   | 100 |
| LATS2                        | LATS2   | 100 | VEGFR2                       | KDR    | 100 |
| LCK                          | LCK     | 100 | WEE1                         | WEE1   | 100 |
| LIMK1                        | LIMK1   | 100 | WEE2                         | WEE1B  | 100 |
| LIMK2                        | LIMK2   | 100 | YANK2                        | STK32B | 100 |
| LKB1                         | STK11   | 100 | YANK3                        | STK32C | 100 |
| LOK                          | STK10   | 94  | YES                          | YES1   | 100 |
| LTK                          | LTK     | 100 | YSK1                         | STK25  | 100 |
| LYN                          | LYN     | 100 | YSK4                         | YSK4   | 84  |
| LZK                          | MAP3K13 | 100 | ZAK                          | ZAK    | 100 |
| MAK                          | MAK     | 62  | ZAP70                        | ZAP70  | 100 |

<sup>a</sup> The compound was screened at 10  $\mu$ M, and results for screen binding interactions were reported as “% ctrl”, where lower numbers indicated stronger hits.

% Ctrl = 100 x (test compound signal - positive control signal)/(negative control signal – positive control signal)

**Figure 1.** Pharmacophore mapping of 4{13, 1}, 4{13, 39} and 4{13, 58}. Pharmacophore features are color coded with green for aromatic feature (Aro), cyan for hydrogen-bond acceptor feature (Acc), and dark green for hydrophobic feature (Hyd).

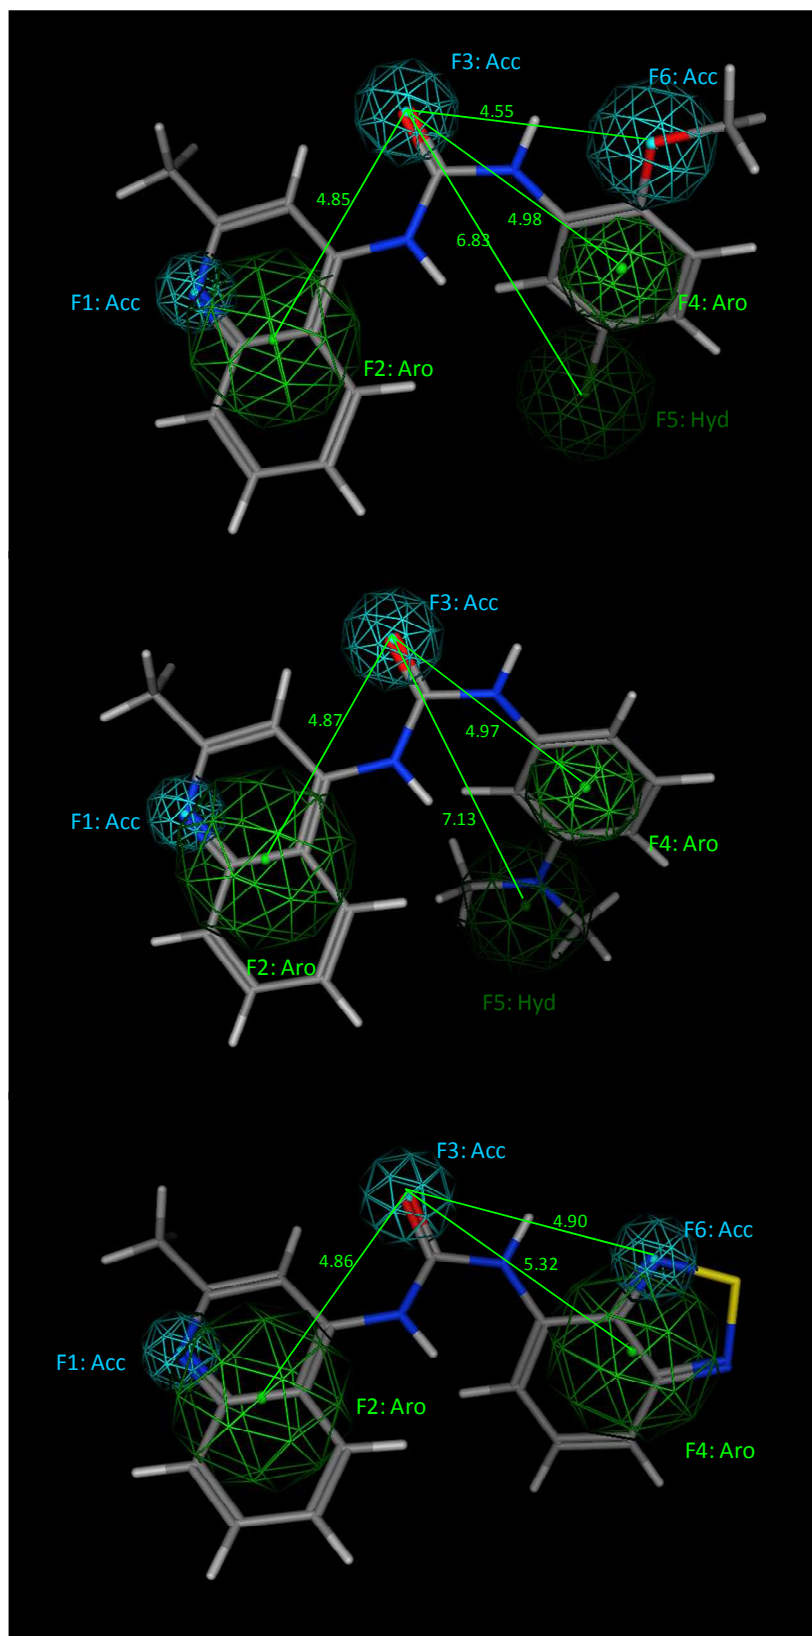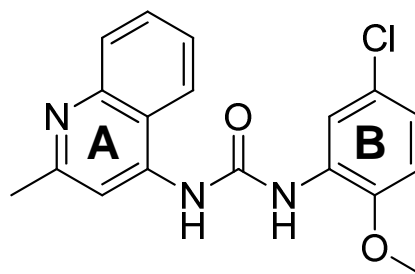

4{13, 1}

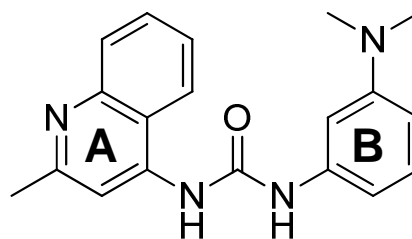

4{13, 39}

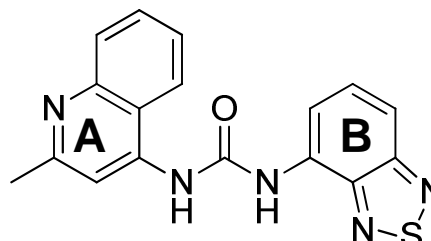

4{13, 58}

**Figure 2.** Treemap™ interaction maps for 4{13, 34} in human kinases. Kinases found to bind are marked with red circles, where larger circles indicate higher-affinity binding. Mutant and lipid kinases are not presented.

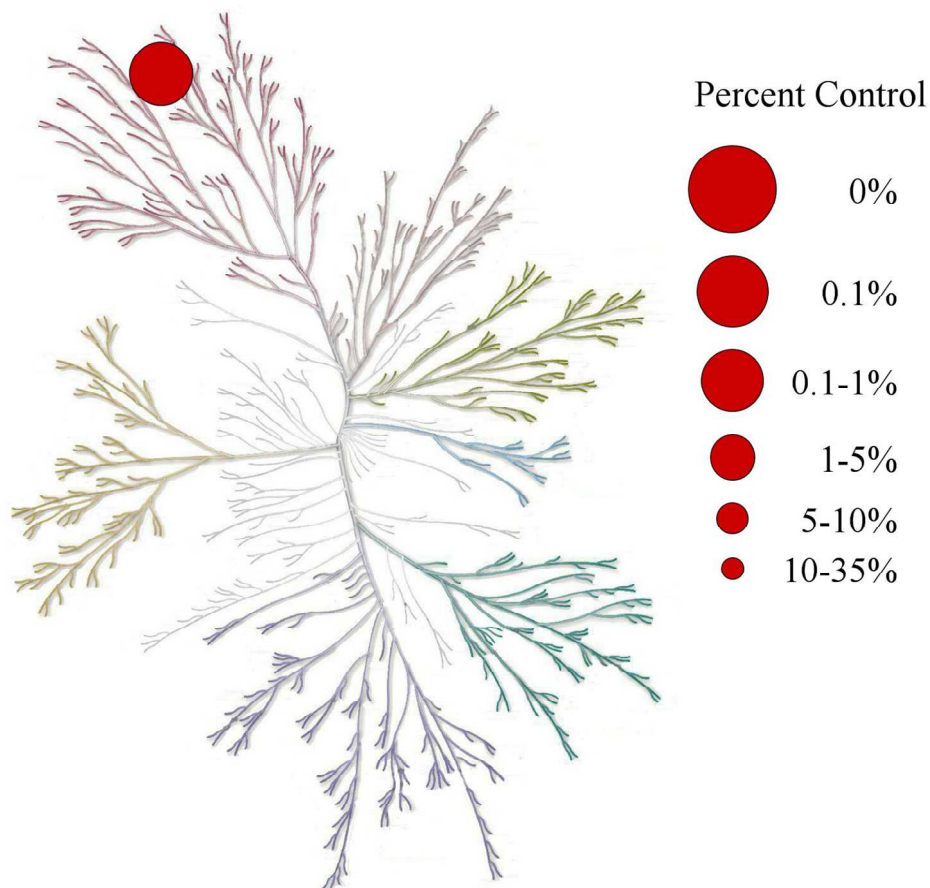

## References

1. Anderson, M. O.; Yu, H.; Penaranda, C.; Maddux, B. A.; Goldfine, I. D.; Youngren, J. F.; Guy, R. K., *J. Comb. Chem.* **2006**, *8*, 784-790.
2. Trager, W.; Jensen, J. B., *Science* **1976**, *193* (4254), 673-5.
3. Smilkstein, M.; Sriwilaijaroen, N.; Kelly, J. X.; Wilairat, P.; Riscoe, M., *Antimicrob Agents Chemother* **2004**, *48* (5), 1803-6.

**1-(5-Chloro-2-methoxyphenyl)-3-(naphthalen-1-yl)urea, 4{12,1}**

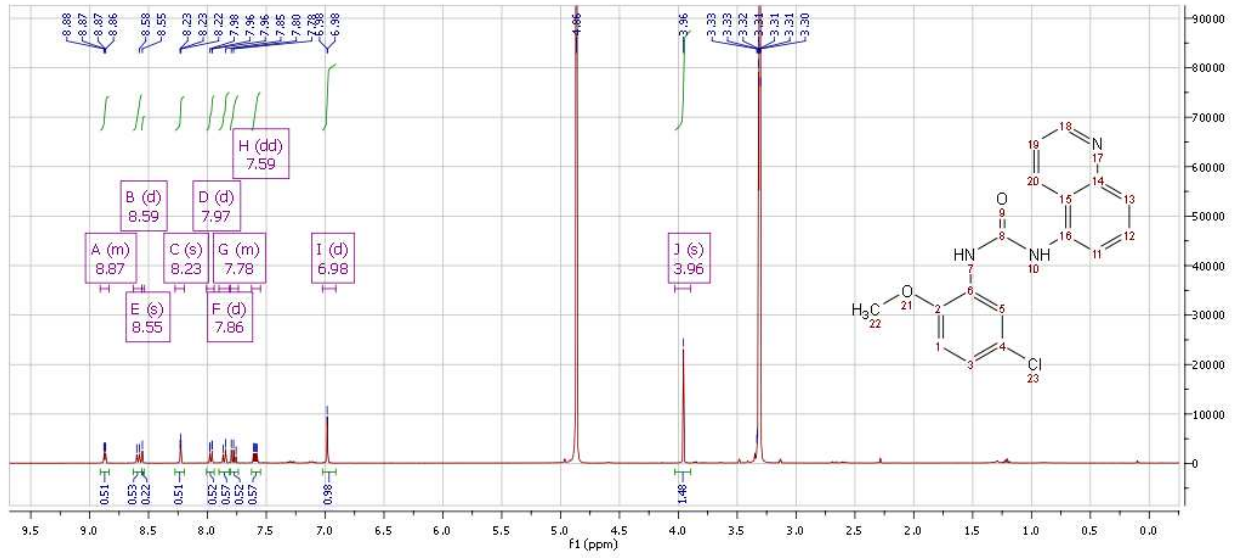

**Sample Report:**

Sample 8 Vial 2:E,12 ID File MLUA261\_A2\_LCMS\_pure Date 20-Jan-2008 Time 02:28:56 Description

2: UV Detector: TIC Smooth (Mn, 20x2)

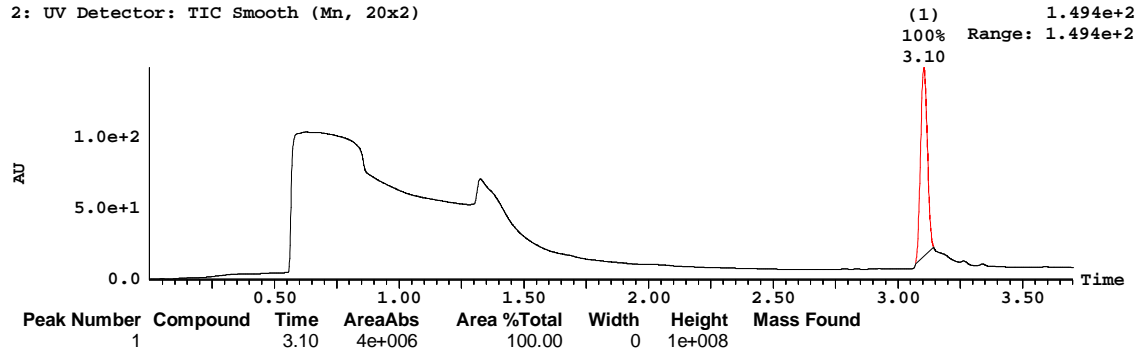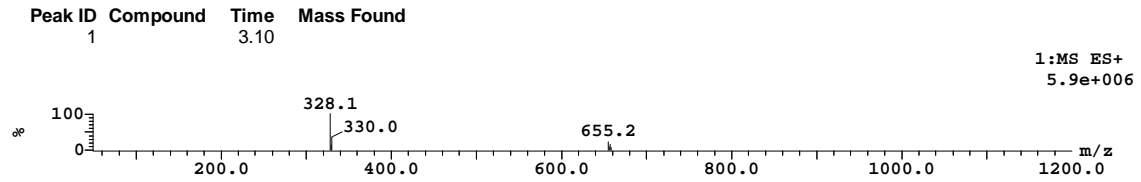

**1-(3-Chloro-4-methylphenyl)-3-(quinolin-5-yl)urea, 4{12,2}**

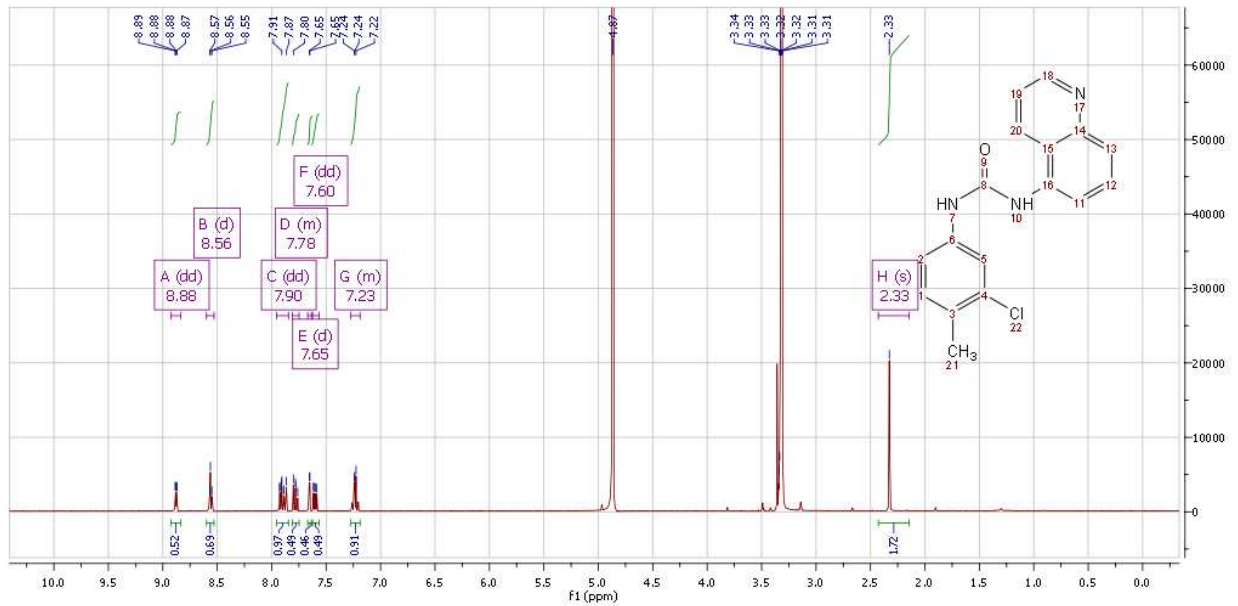

2: UV Detector: TIC Smooth (Mn, 20x2)

(2)

1.696e+2

Range: 1.696e+2

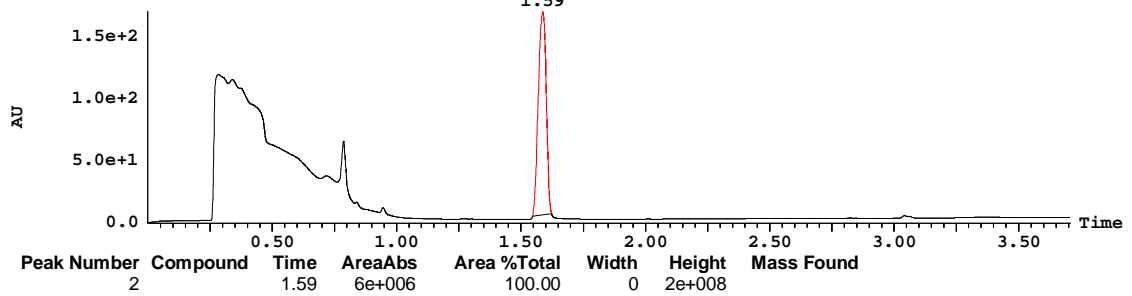

Sample Report (continued):

| Peak ID | Compound | Time | Mass Found |
|---------|----------|------|------------|
| 2       |          | 1.59 |            |

1:MS ES+  
2.8e+007

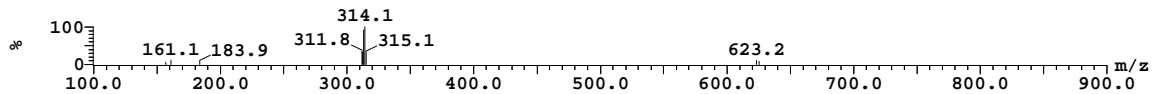



**1-(3-Chloro-4-methoxyphenyl)-3-(quinolin-5-yl)urea, 4{12,3}:**

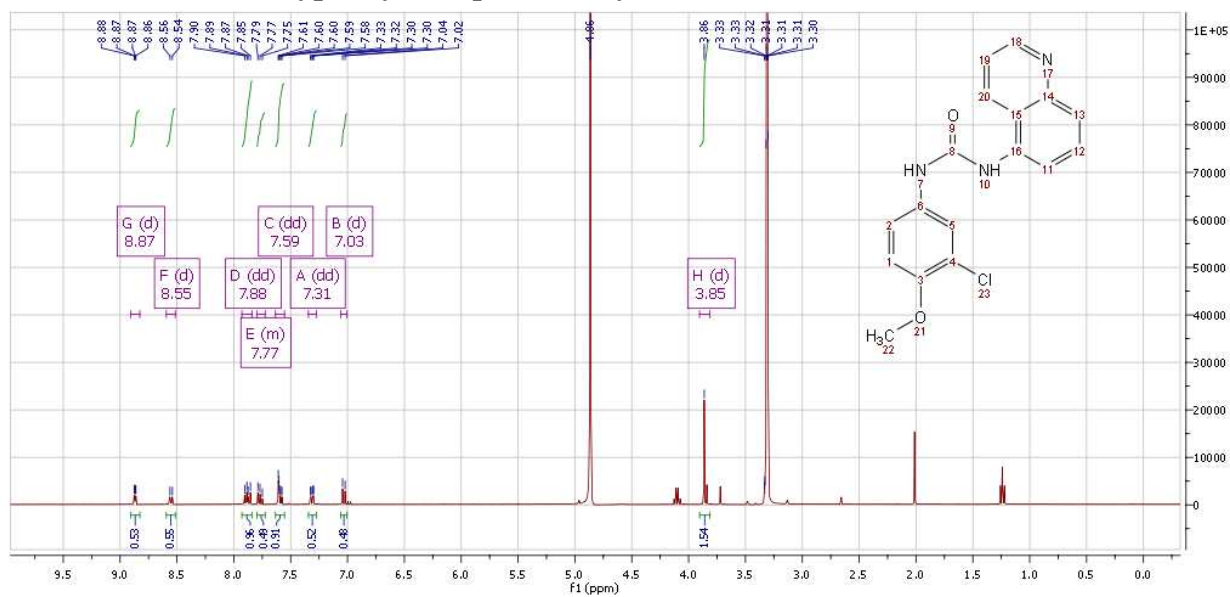

2: UV Detector: TIC Smooth (Mn, 20x2)

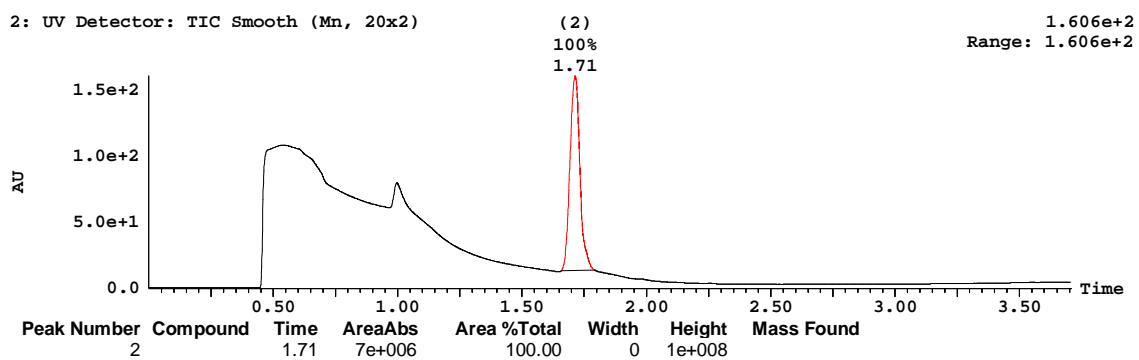

Sample Report (continued):

| Peak ID | Compound | Time | Mass Found |
|---------|----------|------|------------|
| 2       |          | 1.71 |            |

1:MS ES+  
5.3e+007

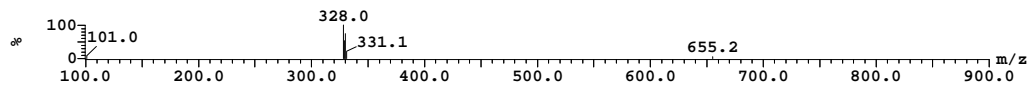

**1-(4-Ethylphenyl)-3-(quinolin-5-yl)urea, 4{12,4}**:

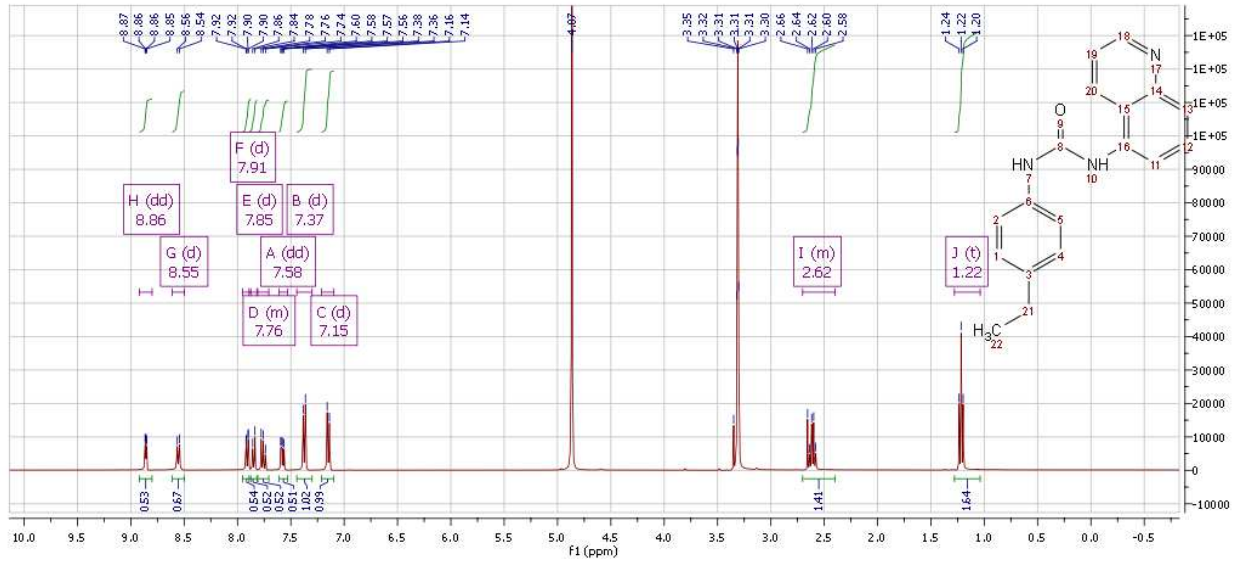

2: UV Detector: TIC Smooth (Mn, 20x2)

1.208e+2  
Range: 1.208e+2

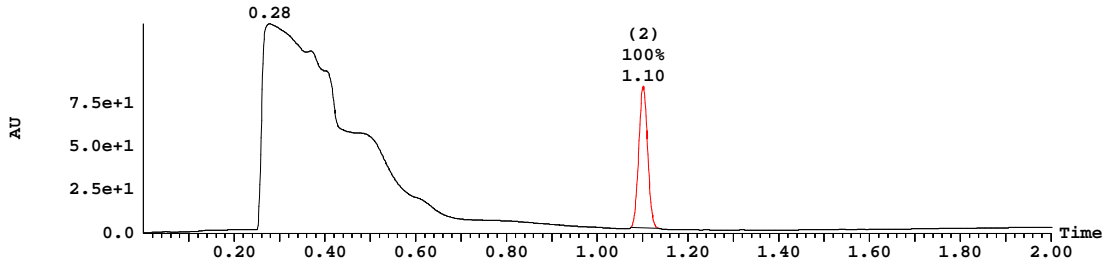

| Peak ID | Compound | Time | Mass Found |
|---------|----------|------|------------|
| 1       |          | 0.78 |            |

1:MS ES+  
9.3e+007

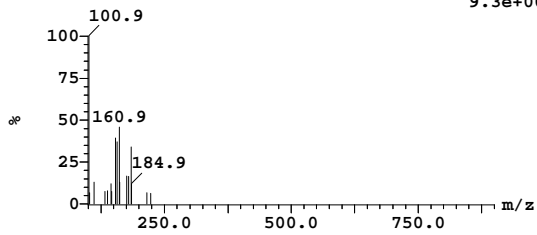

| Peak ID | Compound | Time | Mass Found |
|---------|----------|------|------------|
| 2       |          | 1.10 |            |

1:MS ES+  
9.2e+007

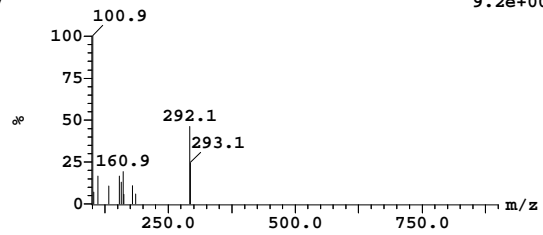

**1-(3-Chlorophenyl)-3-(2-methylquinolin-4-yl)urea, 4{13,7}:**

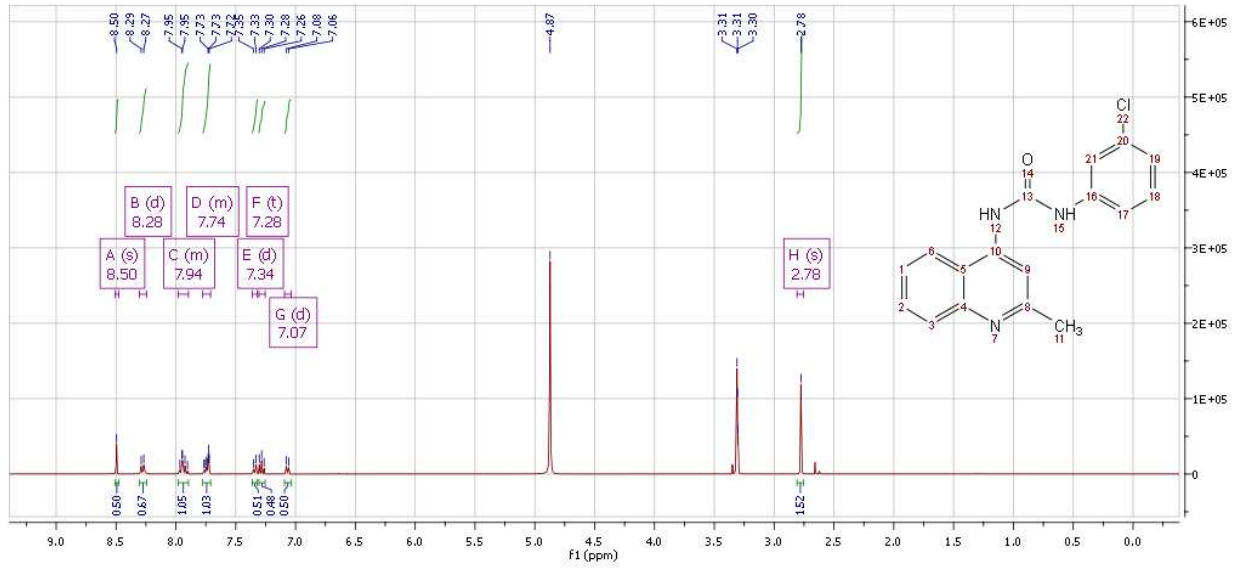

2: UV Detector: TIC Smooth (Mn, 20x2)

1.208e+2  
Range: 1.208e+2

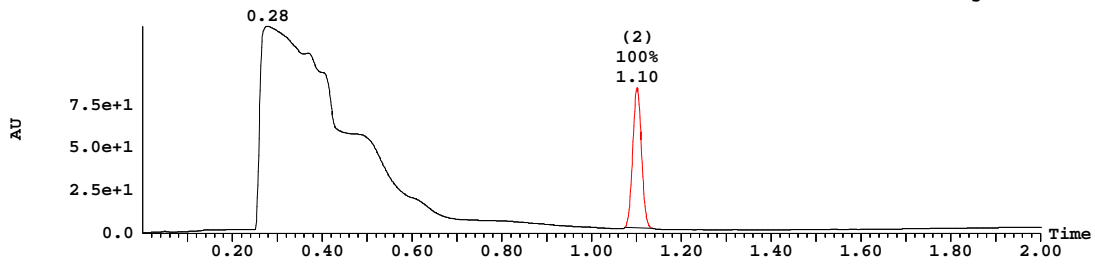

| Peak ID | Compound | Time | Mass Found |
|---------|----------|------|------------|
| 1       |          | 0.78 |            |

1:MS ES+  
9.3e+007

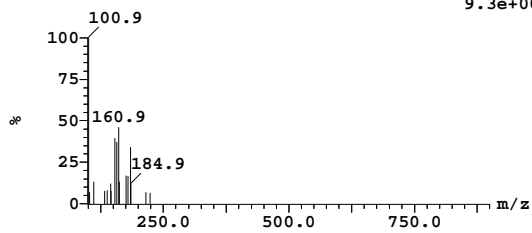

| Peak ID | Compound | Time | Mass Found |
|---------|----------|------|------------|
| 2       |          | 1.10 |            |

1:MS ES+  
9.2e+007

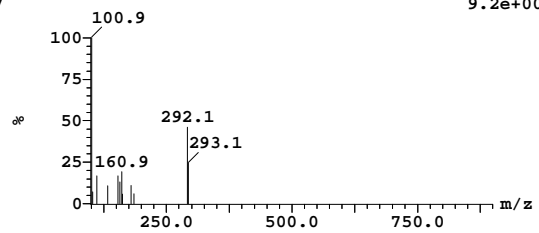

**1-(4-Chloro-3-(trifluoromethyl)phenyl)-3-(2-methylquinolin-4-yl)urea, 4{13,12}**:

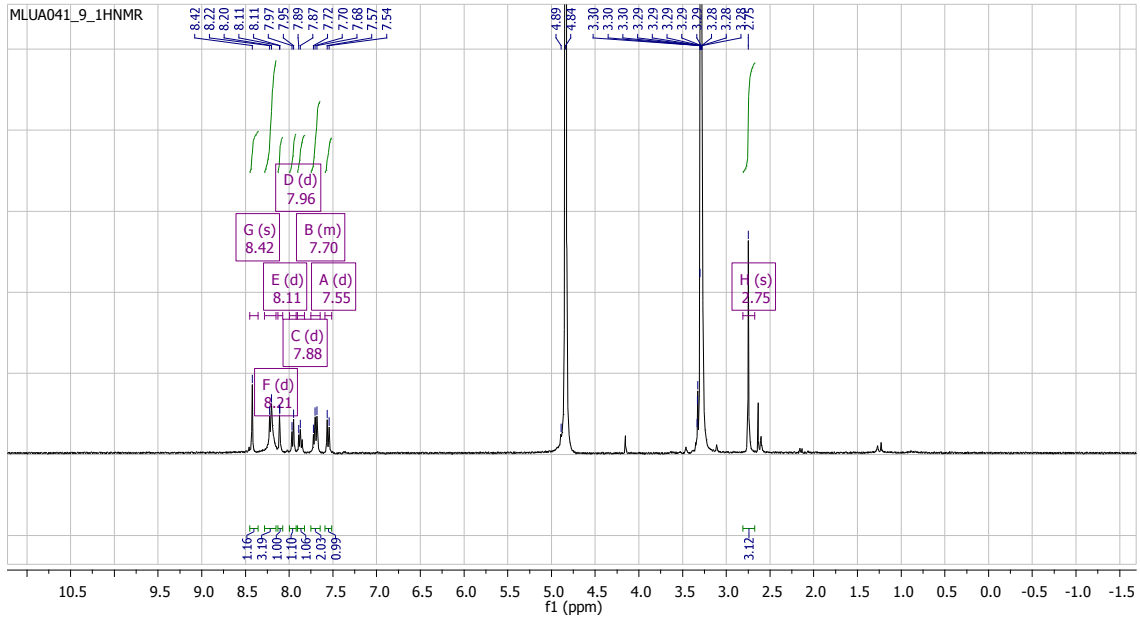

**Sample Report:**

Sample 3 Vial 3:12,F ID File MLUA041\_9\_LCMS\_PURE Date 23-Feb-2007 Time 15:56:40 Description

2: UV Detector: TIC

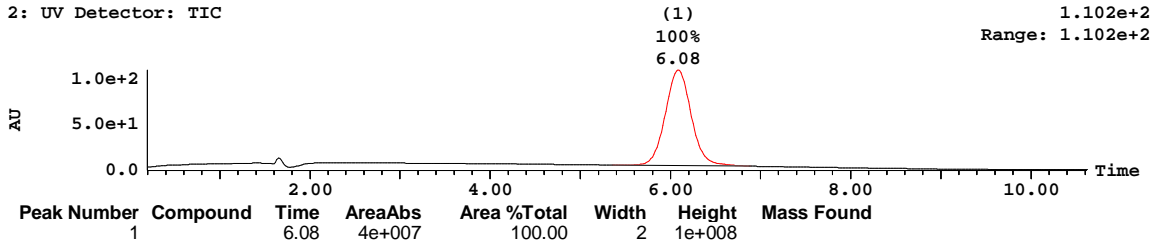

| Peak ID | Compound | Time | Mass Found | Peak ID | Compound | Time | Mass Found |
|---------|----------|------|------------|---------|----------|------|------------|
| 1       |          | 6.08 |            | 1       |          | 6.08 |            |

1: (Time: 6.08)      3.119 AU 1: (Time: 6.08)      7.4e+007

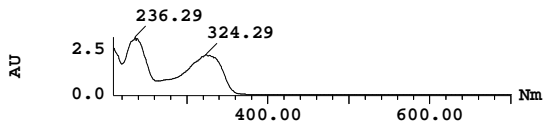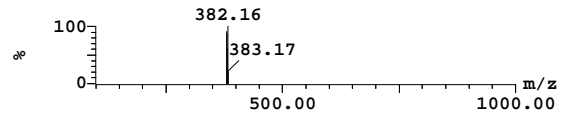

**1-(2-Methylquinolin-4-yl)-3-(m-tolyl)urea, 4{13,21}:**

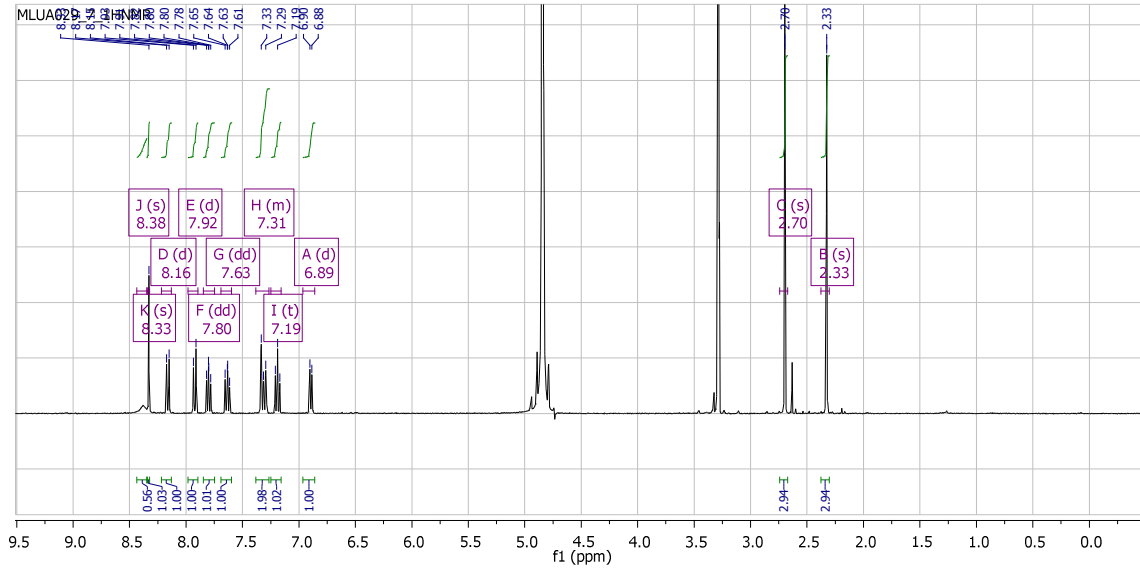

**Sample Report:**

Sample 5 Vial 4:8,G ID File MLUA029\_7\_LCMS\_pure Date 12-Feb-2007 Time 09:32:55 Description

2: UV Detector: TIC

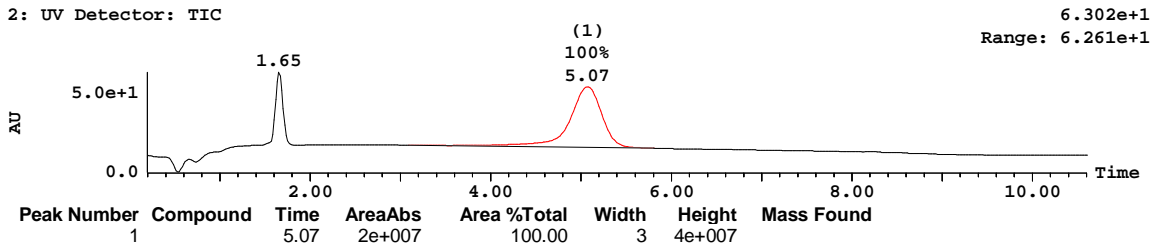

|                 |          |      |            |                          |          |      |            |
|-----------------|----------|------|------------|--------------------------|----------|------|------------|
| Peak ID         | Compound | Time | Mass Found | Peak ID                  | Compound | Time | Mass Found |
| 1               |          | 5.07 |            | 1                        |          | 5.07 |            |
| 1: (Time: 5.07) |          |      |            | 1.025 AU 1: (Time: 5.07) |          |      |            |
|                 |          |      |            | 4.6e+007                 |          |      |            |

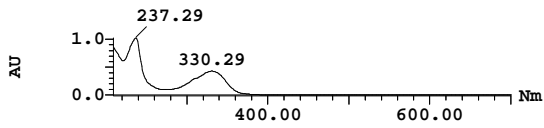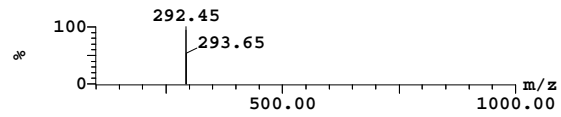

**1-(2-(tert-Butyl)phenyl)-3-(2-methylquinolin-4-yl)urea, 4{13,22}**:

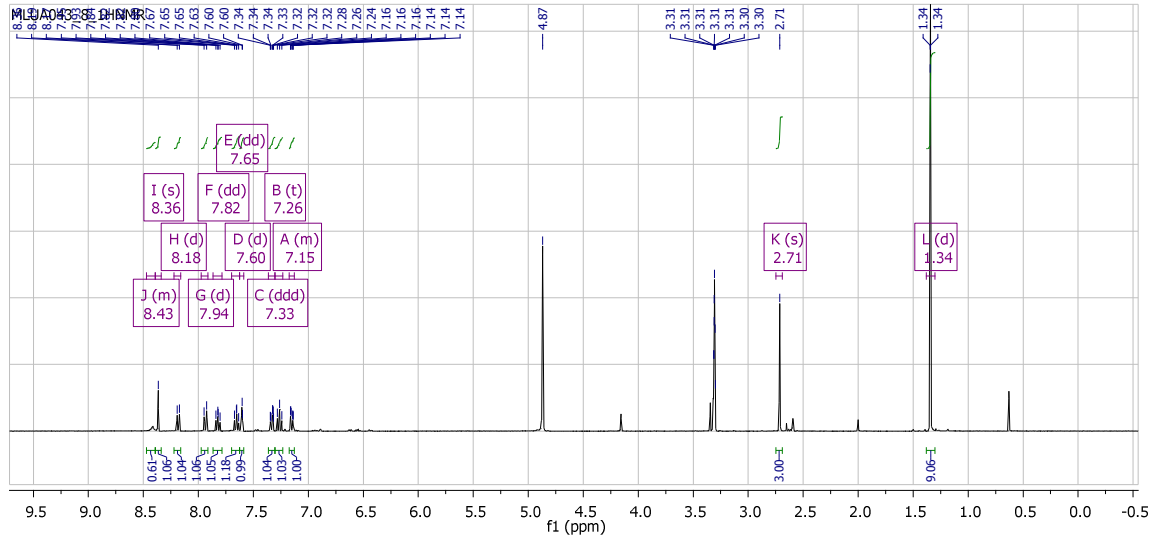

**Sample Report:**

Sample 10 Vial 3:1,C ID File MLUA043\_8\_LCMS\_PURE Date 23-Feb-2007 Time 17:46:31 Description

2: UV Detector: TIC

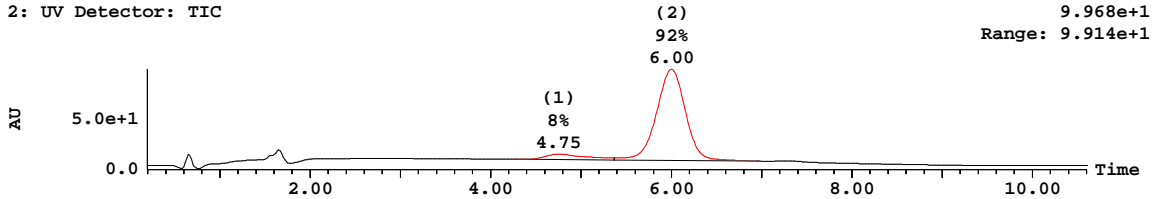

| Peak Number | Compound | Time | AreaAbs | Area %Total | Width | Height | Mass Found |
|-------------|----------|------|---------|-------------|-------|--------|------------|
| 1           |          | 4.75 | 3e+006  | 8.28        | 1     | 6e+006 |            |
| 2           |          | 6.00 | 3e+007  | 91.72       | 2     | 9e+007 |            |

| Peak ID | Compound | Time | Mass Found | Peak ID | Compound | Time | Mass Found |
|---------|----------|------|------------|---------|----------|------|------------|
| 1       |          | 4.75 |            | 2       |          | 6.00 |            |

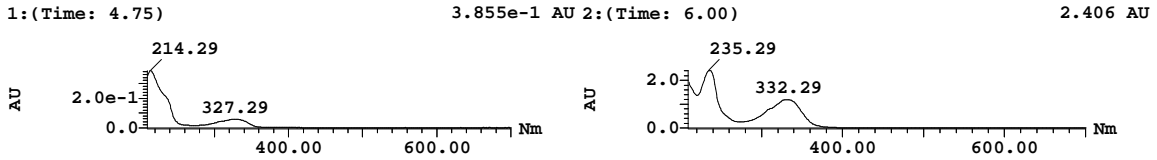

| Peak ID | Compound | Time | Mass Found | Peak ID | Compound | Time | Mass Found |
|---------|----------|------|------------|---------|----------|------|------------|
| 1       |          | 4.75 | 1.7e+007   | 2       |          | 6.00 | 5.9e+007   |

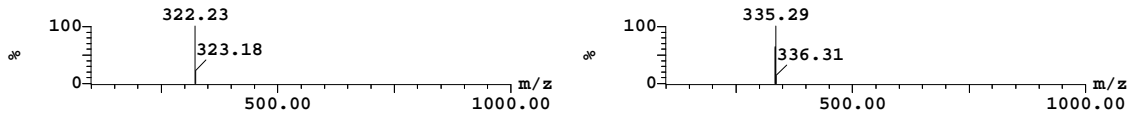

**1-(3-(tert-Butyl)phenyl)-3-(2-methylquinolin-4-yl)urea, 4{13,23}**:

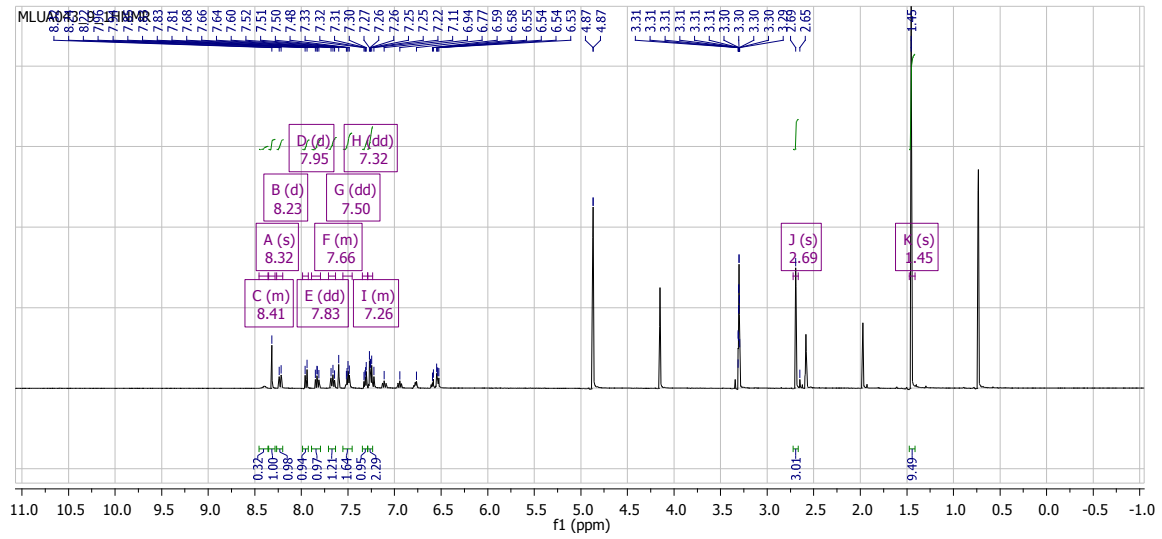

**Sample Report:**

Sample 6 Vial 3:12,H ID File MLUA043\_9\_LCMS\_PURE Date 23-Feb-2007 Time 16:44:30 Description

2: UV Detector: TIC

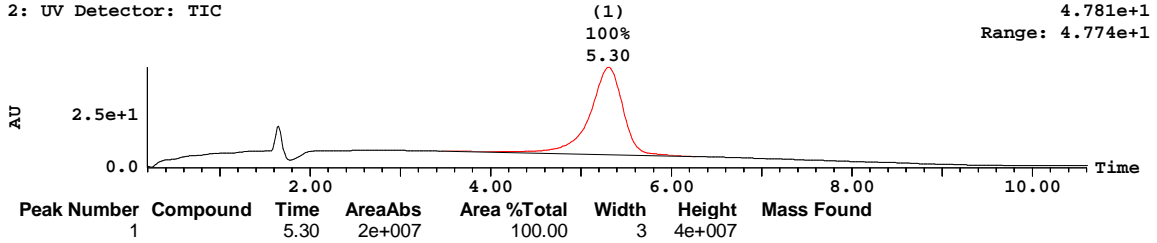

| Peak ID | Compound | Time | Mass Found |
|---------|----------|------|------------|
| 1       |          | 5.30 |            |

1: (Time: 5.30) 1.247 AU 1: (Time: 5.30) 3.1e+007

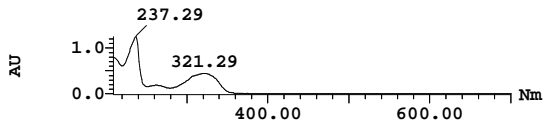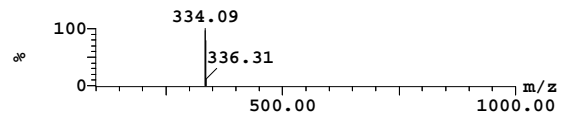

**1-(4-(tert-Butyl)phenyl)-3-(2-methylquinolin-4-yl)urea, 4{13,24}**:

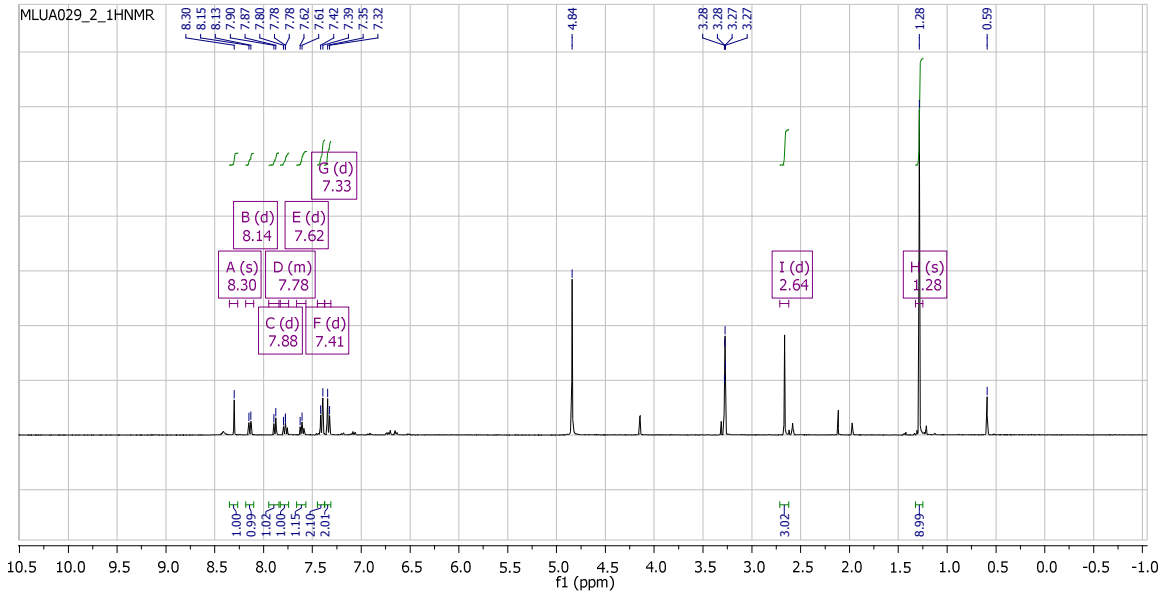

Sample Report:

Sample 4 Vial 4:12,F ID File MLUA029\_2\_LCMS\_PURE2 Date 16-Feb-2007 Time 18:45:47 Description

2: UV Detector: TIC

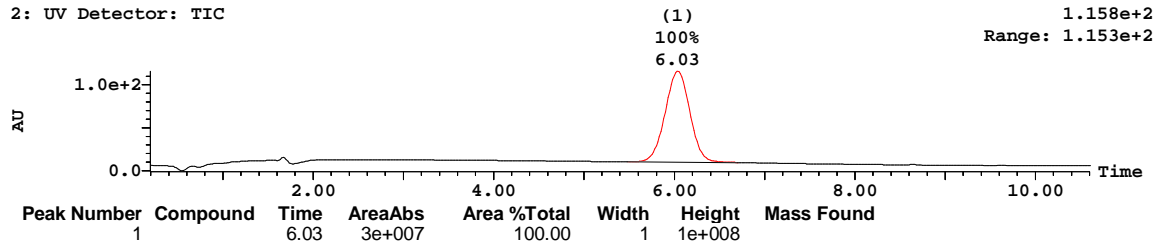

Peak ID Compound Time Mass Found

1: (Time: 6.03)

Peak ID Compound Time Mass Found

1: (Time: 6.03) 3.096 AU 1: (Time: 6.03) 8.8e+007

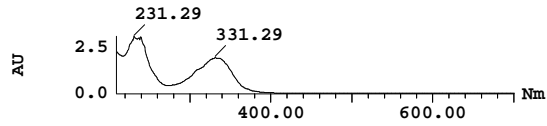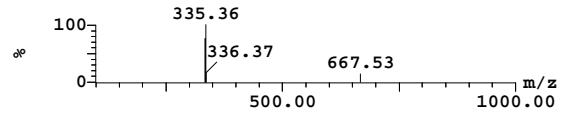



**1-(2-Methylquinolin-4-yl)-3-(4-(trifluoromethyl)phenyl)urea, 4{13,27}:**

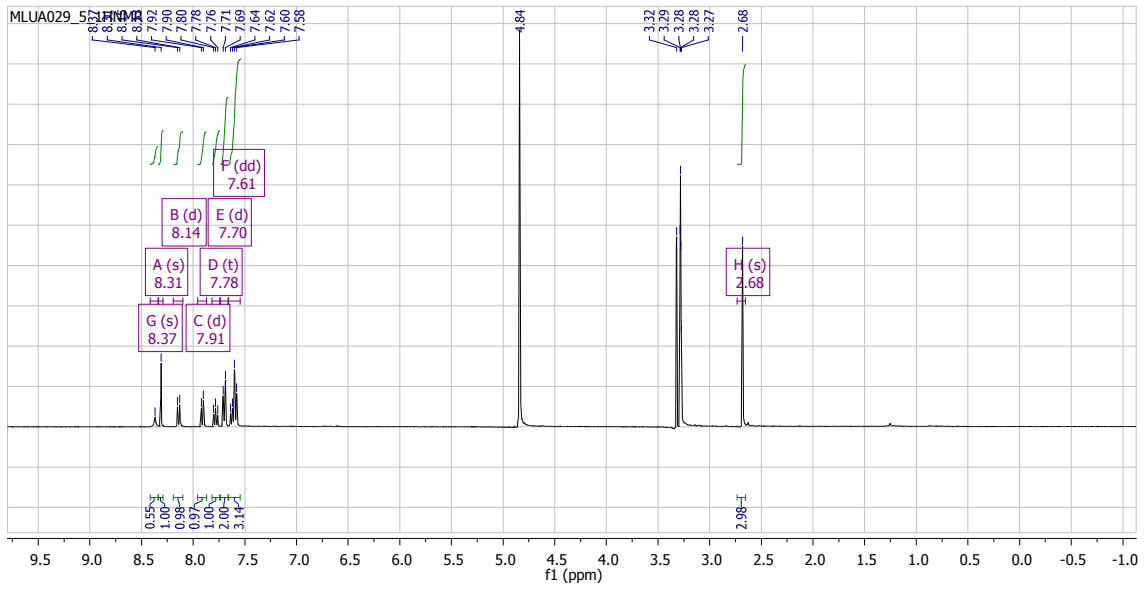

**Sample Report:**

Sample 3 Vial 4:8,E ID File MLUA029\_5\_LCMS\_pure Date 12-Feb-2007 Time 09:10:10 Description

2: UV Detector: TIC

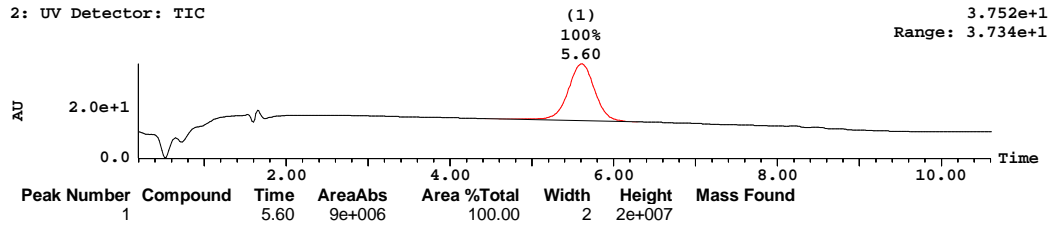

| Peak ID         | Compound | Time | Mass Found | Peak ID                     | Compound | Time | Mass Found |
|-----------------|----------|------|------------|-----------------------------|----------|------|------------|
| 1               |          | 5.60 |            | 1                           |          | 5.60 |            |
| 1: (Time: 5.60) |          |      |            | 6.958e-1 AU 1: (Time: 5.60) |          |      |            |
|                 |          |      |            | 4.8e+007                    |          |      |            |

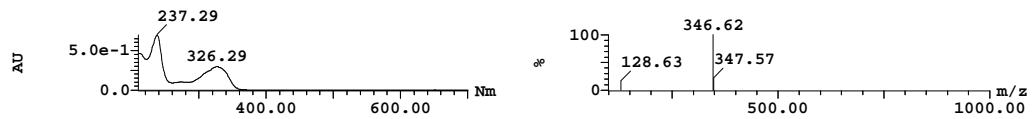

**1-(2-Methylquinolin-4-yl)-3-(4-nitro-3-(trifluoromethyl)phenyl)urea, 4{13,28}:**

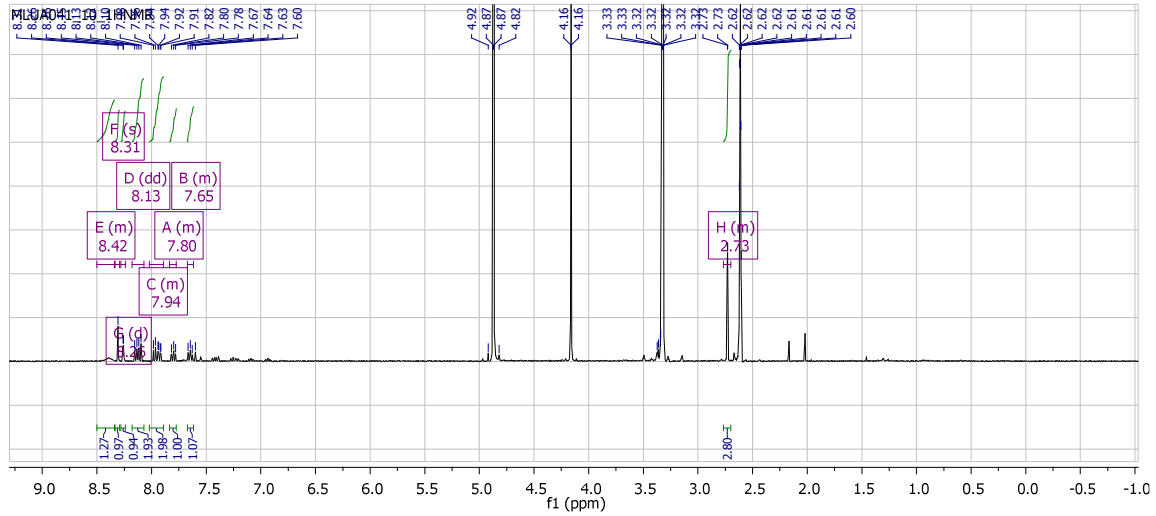

Sample Report:

Sample 5 Vial 3:8,B ID File MLUA041\_10\_pure Date 28-Feb-2007 Time 17:43:34 Description

2: UV Detector: TIC

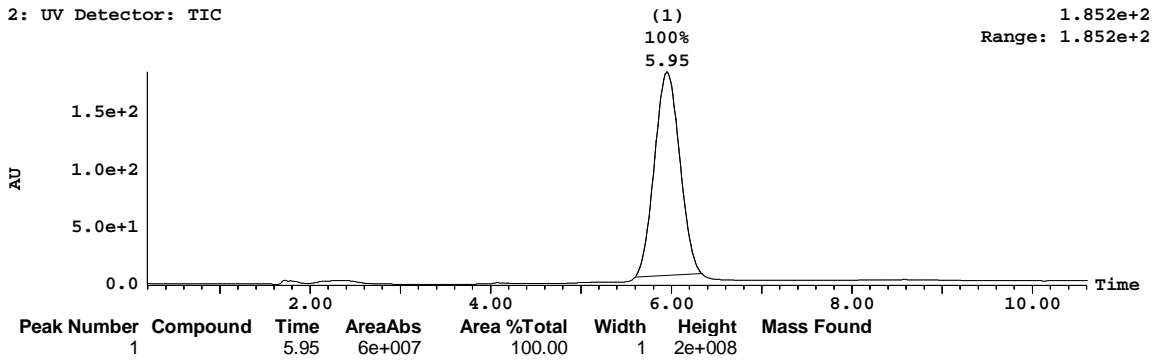

| Peak ID | Compound | Time | Mass Found | Peak ID | Compound | Time | Mass Found |
|---------|----------|------|------------|---------|----------|------|------------|
| 1       |          | 5.95 |            | 1       |          | 5.95 |            |

1: (Time: 5.95) 4.013 AU 1: (Time: 5.95) 9.4e+006

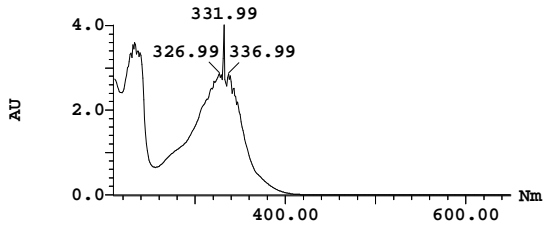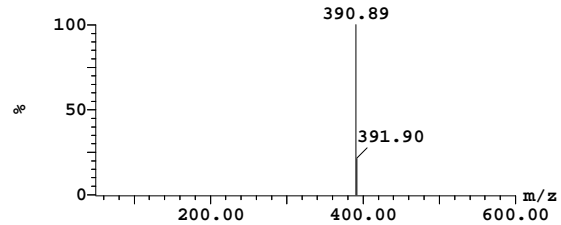

**1-(2-Methylquinolin-4-yl)-3-(2-nitrophenyl)urea, 4{13,41}:**

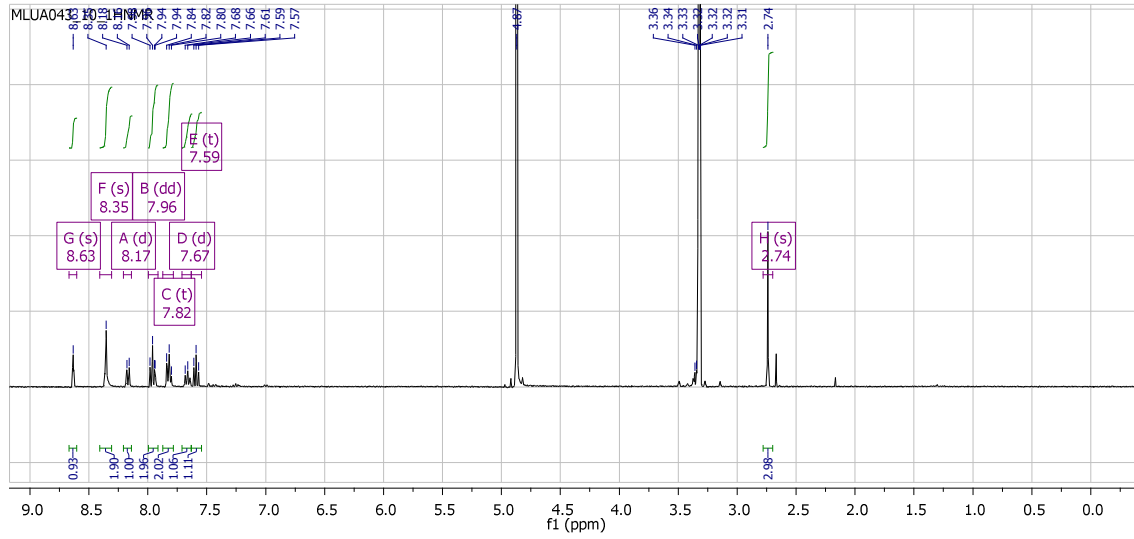

**Sample Report:**

Sample 13 Vial 2:6,F ID File MLUA043\_10\_LCMS\_crude Date 26-Feb-2007 Time 09:44:55 Description

2: UV Detector: TIC

2.009e+2  
Range: 2.006e+2

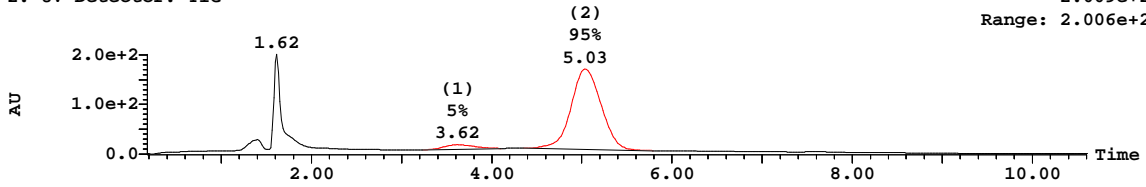

| Peak Number | Compound | Time | AreaAbs | Area %Total | Width | Height | Mass Found |
|-------------|----------|------|---------|-------------|-------|--------|------------|
| 1           |          | 3.62 | 3e+006  | 5.21        | 1     | 9e+006 |            |
| 2           |          | 5.03 | 6e+007  | 94.79       | 1     | 2e+008 |            |

Peak ID Compound Time Mass Found

Peak ID Compound Time Mass Found

1:(Time: 3.62)

4.715e-1 AU 2:(Time: 5.03)

3.154 AU

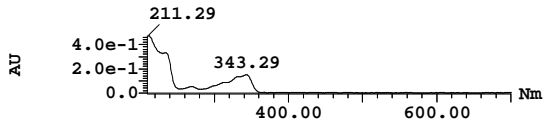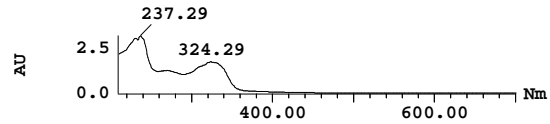

Peak ID Compound Time Mass Found

Peak ID Compound Time Mass Found

1:(Time: 3.62)

2.0e+006 2:(Time: 5.03)

6.4e+007

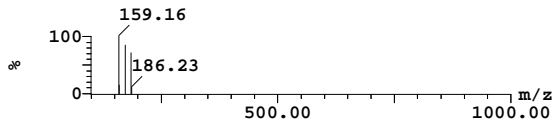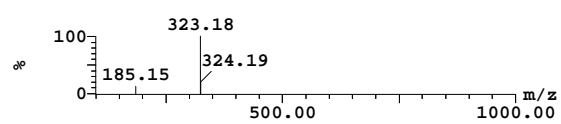

**1-(2-Methylquinolin-4-yl)-3-(3-nitrophenyl)urea, 4{13,42}:**

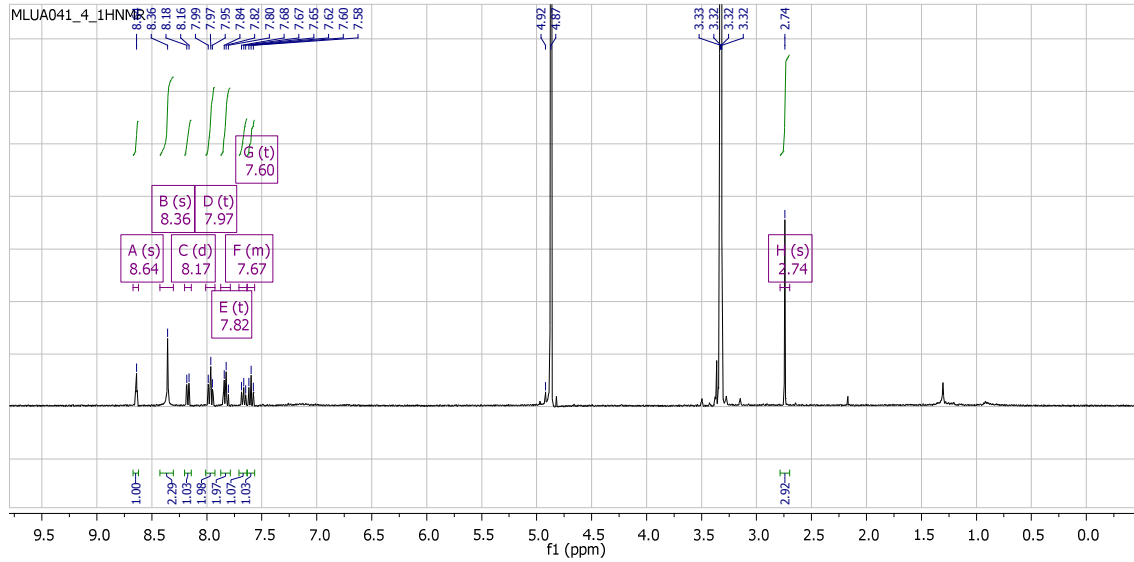

**Sample Report:**

Sample 13 Vial 4:9,H ID File MLUA041\_4\_LCMS\_pure Date 05-Mar-2007 Time 10:52:08 Description

2: UV Detector: TIC

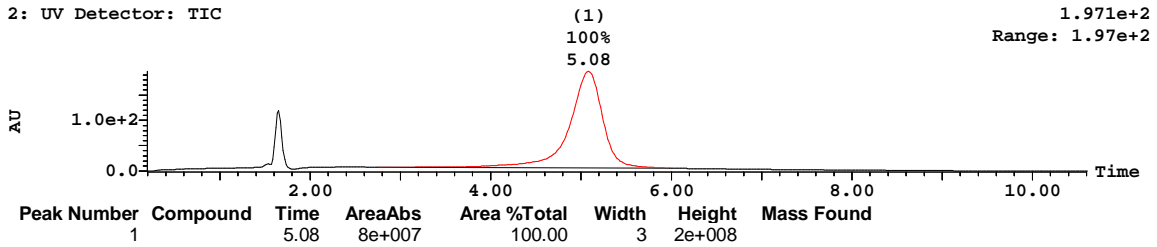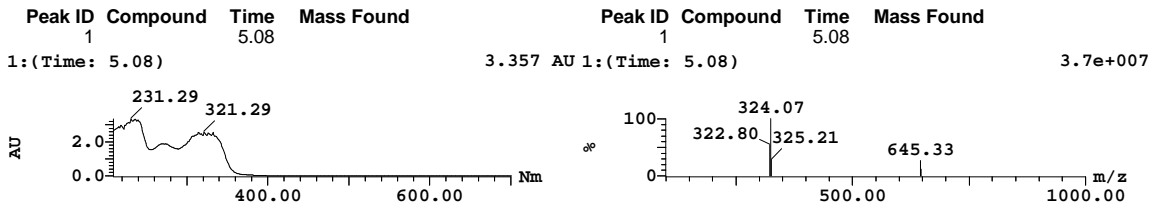

**1-(4-Hydroxyphenyl)-3-(2-methylquinolin-4-yl)urea, 4{13,43}:**

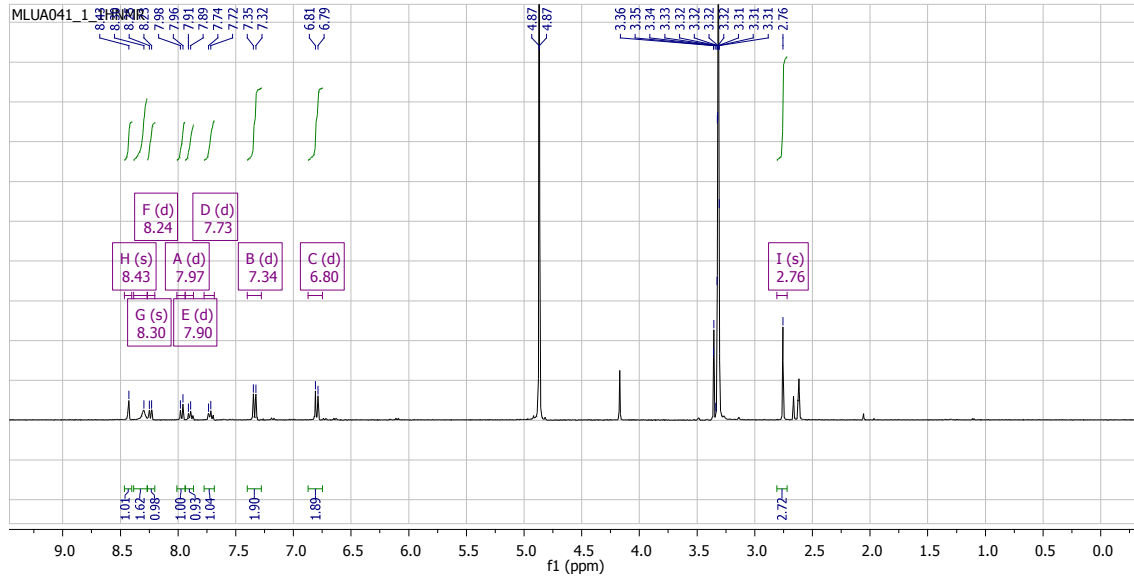

**Sample Report:**

Sample 4 Vial 3:12,E ID File MLUA041\_1\_LCMS\_PURE Date 23-Feb-2007 Time 15:45:15 Description

2: UV Detector: TIC

3.226e+2  
Range: 3.225e+2

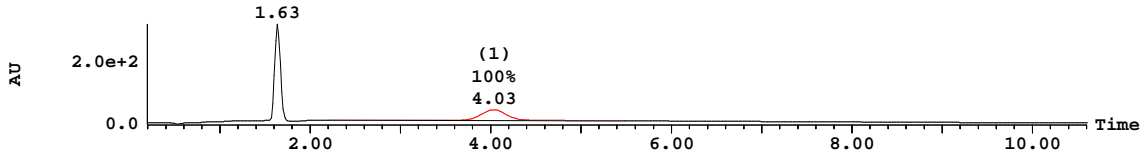

| Peak Number | Compound | Time | AreaAbs | Area %Total | Width | Height | Mass Found |
|-------------|----------|------|---------|-------------|-------|--------|------------|
| 1           |          | 4.03 | 1e+007  | 100.00      | 3     | 4e+007 |            |

| Peak ID         | Compound | Time | Mass Found | Peak ID                  | Compound | Time | Mass Found |
|-----------------|----------|------|------------|--------------------------|----------|------|------------|
| 1               |          | 4.03 |            | 1                        |          | 4.03 |            |
| 1: (Time: 4.03) |          |      |            | 1.523 AU 1: (Time: 4.03) |          |      |            |
|                 |          |      |            | 8.3e+007                 |          |      |            |

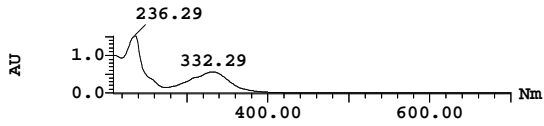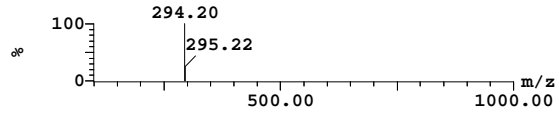

**1-(2-Aminophenyl)-3-(2-methylquinolin-4-yl)urea, 4{13,44}**:

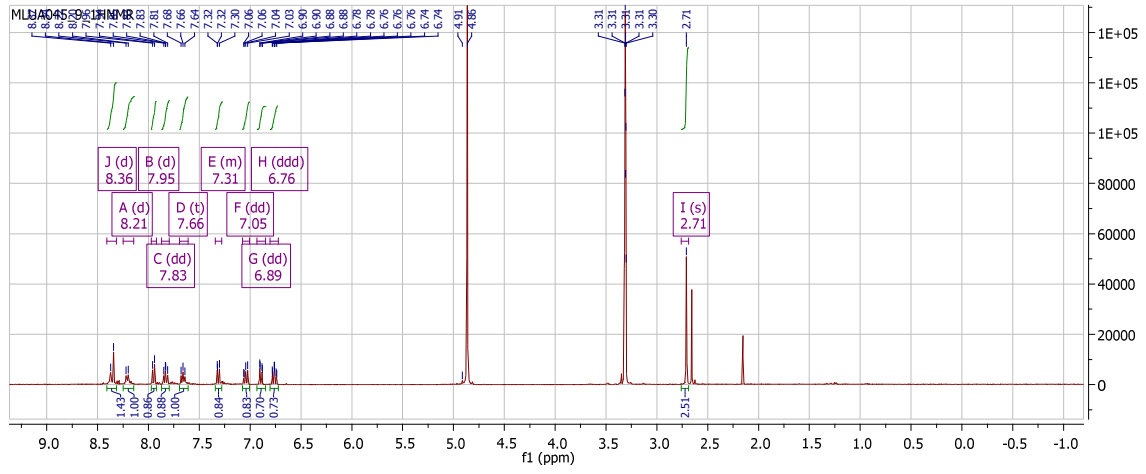

**Sample Report:**

Sample 9 Vial 2:4,G ID File MLUA045\_9\_pure Date 28-Feb-2007 Time 17:31:22 Description

2: UV Detector: TIC

1.971e+2  
Range: 1.97e+2

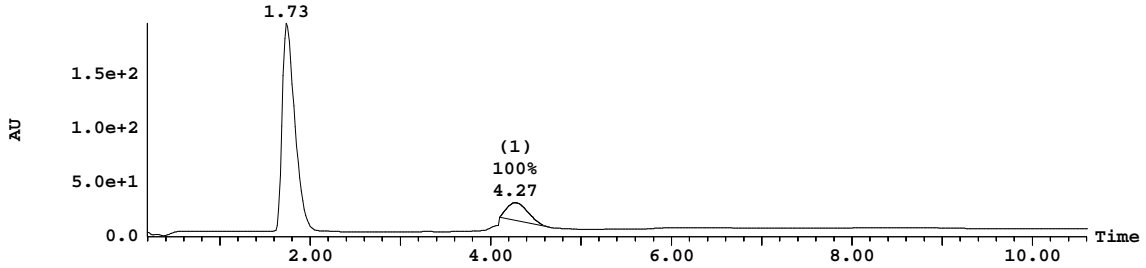

| Peak Number | Compound | Time | AreaAbs | Area %Total | Width | Height | Mass Found |
|-------------|----------|------|---------|-------------|-------|--------|------------|
| 1           |          | 4.27 | 4e+006  | 100.00      | 1     | 2e+007 |            |

| Peak ID         | Compound | Time | Mass Found | Peak ID                     | Compound | Time | Mass Found |
|-----------------|----------|------|------------|-----------------------------|----------|------|------------|
| 1               |          | 4.27 |            | 1                           |          | 4.27 |            |
| 1: (Time: 4.27) |          |      |            | 9.349e-1 AU 1: (Time: 4.27) |          |      |            |
|                 |          |      |            | 2.7e+006                    |          |      |            |

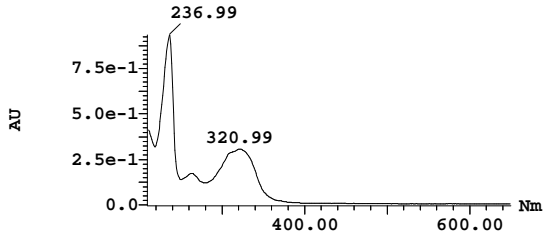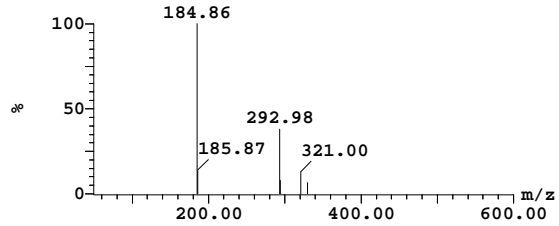

**1-(4-Aminophenyl)-3-(2-methylquinolin-4-yl)urea, 4{13,45}**

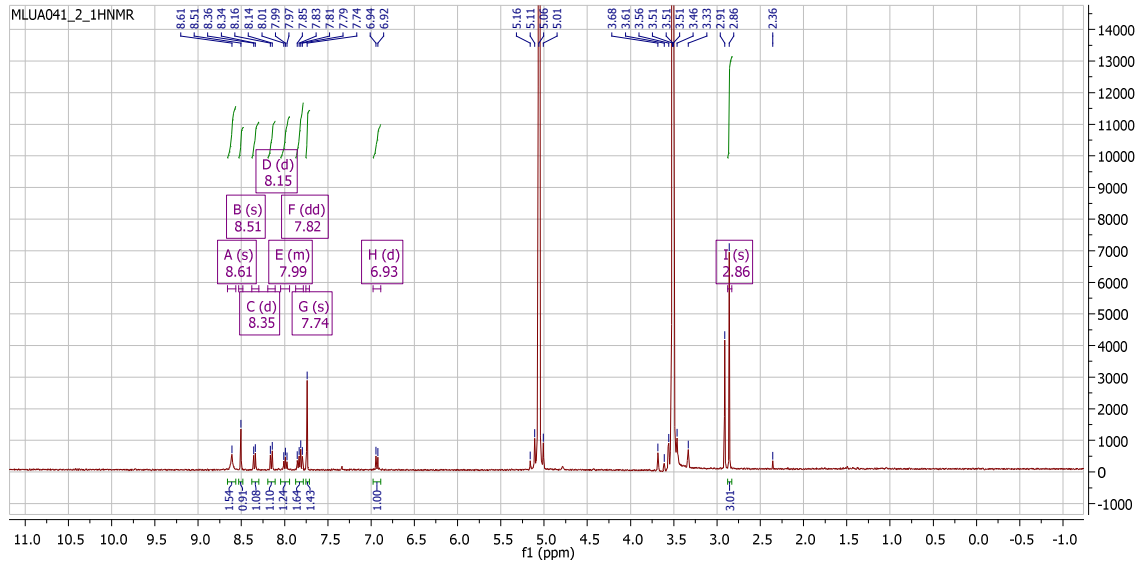

**Sample Report:**

Sample 13 Vial 4:3,A ID File MLUA0041\_2\_LCMS\_pure Date 27-Feb-2007 Time 19:50:08 Description

2: UV Detector: TIC

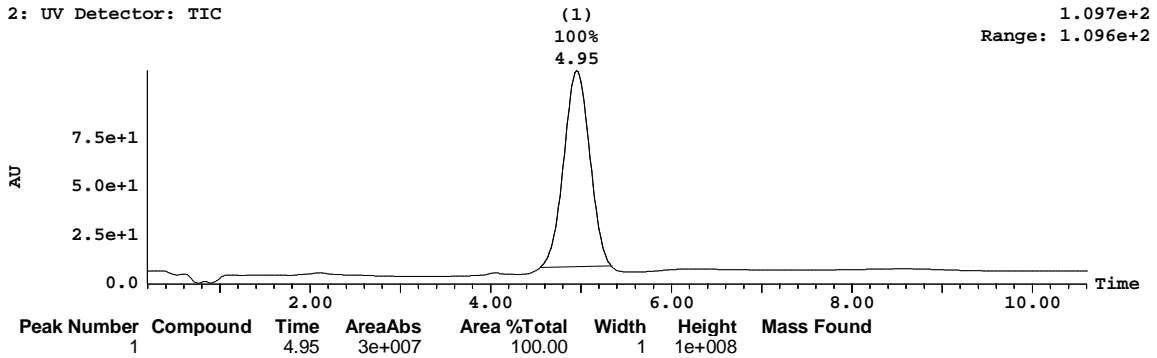

Peak ID Compound Time Mass Found  
1 4.95

Peak ID Compound Time Mass Found  
1 4.95

1: (Time: 4.95)

2.606 AU 1: (Time: 4.95)

2.5e+006

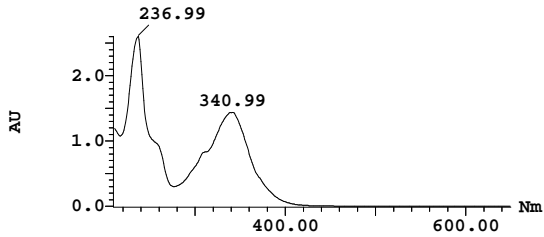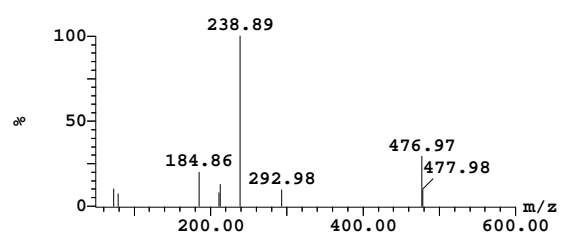

**2-(3-(2-Methylquinolin-4-yl)ureido)benzamide, 4{13,49}:**

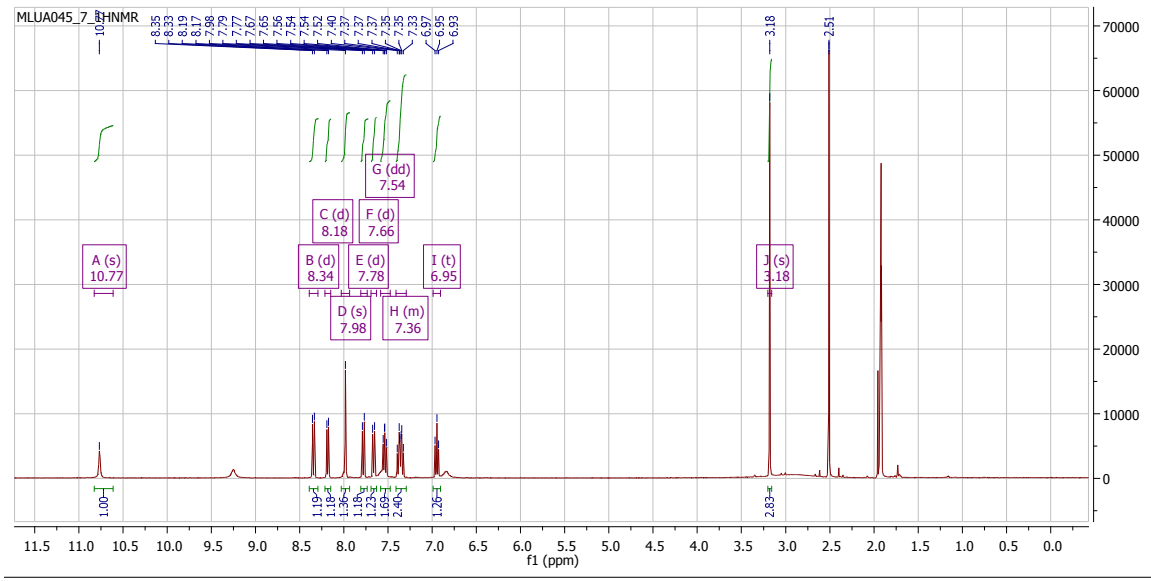

**Sample Report:**

Sample 12 Vial 3:10,C ID File MLUA0045\_7\_LCMS\_pure Date 27-Feb-2007 Time 00:40:59 Description

2: UV Detector: TIC

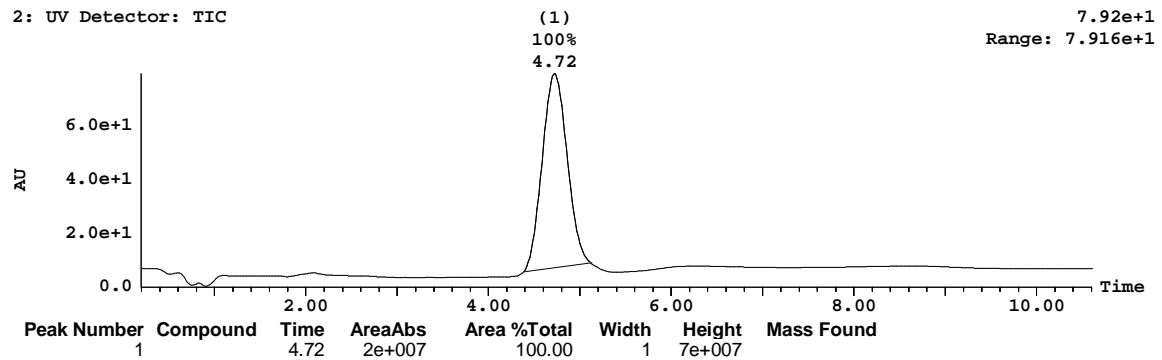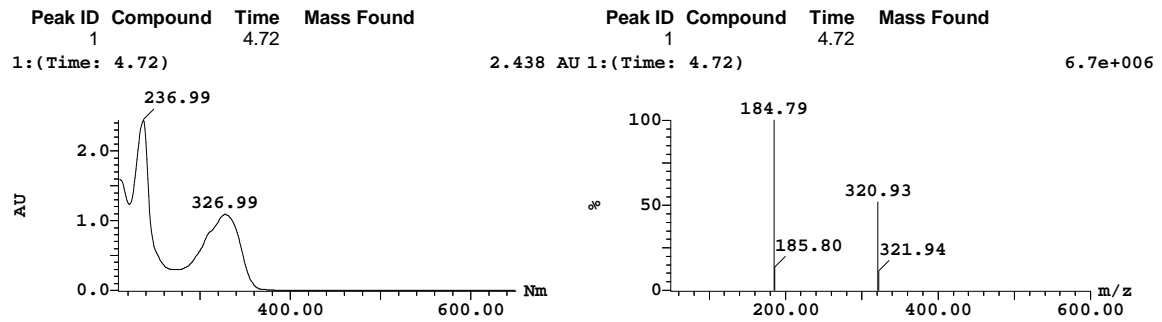



**3-(3-(2-Methylquinolin-4-yl)ureido)benzamide, 4{13,50}:**

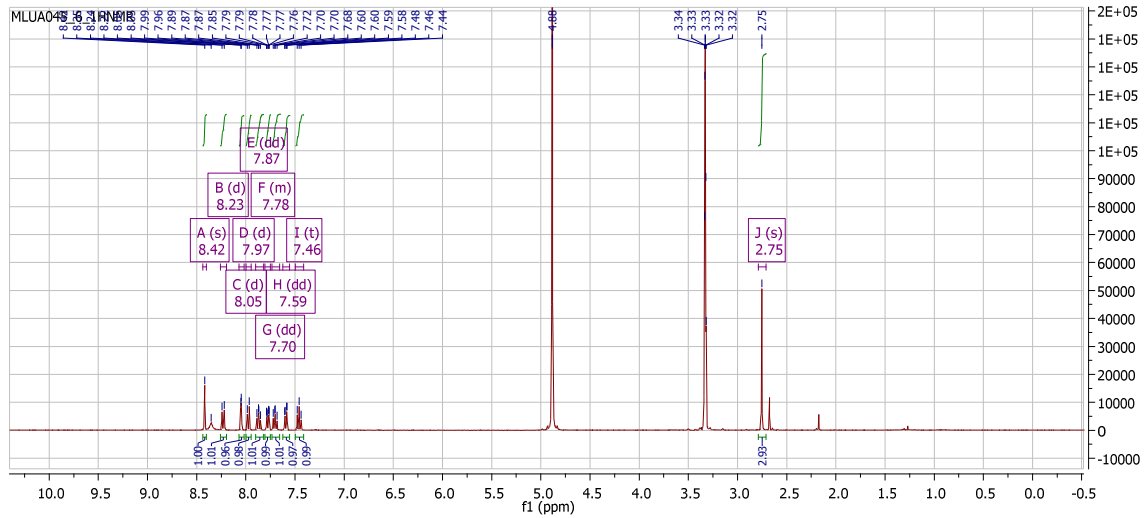

**Sample Report:**

Sample 12 Vial 4:9,F ID File MLUA045\_6\_LCMS\_pure Date 05-Mar-2007 Time 10:11:39 Description

2: UV Detector: TIC

3.011e+2  
Range: 3.011e+2

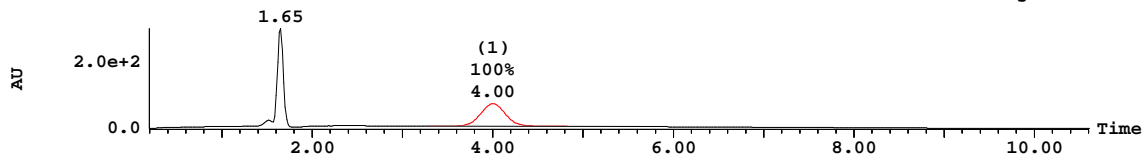

| Peak Number | Compound | Time | AreaAbs | Area %Total | Width | Height | Mass Found |
|-------------|----------|------|---------|-------------|-------|--------|------------|
| 1           |          | 4.00 | 2e+007  | 100.00      | 2     | 7e+007 |            |

| Peak ID         | Compound | Time | Mass Found | Peak ID                  | Compound | Time | Mass Found |
|-----------------|----------|------|------------|--------------------------|----------|------|------------|
| 1               |          | 4.00 |            | 1                        |          | 4.00 |            |
| 1: (Time: 4.00) |          |      |            | 2.537 AU 1: (Time: 4.00) |          |      | 8.2e+007   |

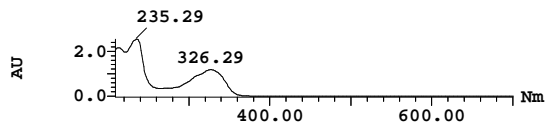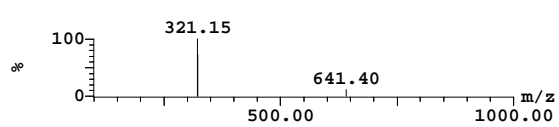

**1-(1H-benzo[d]imidazol-6-yl)-3-(2-methylquinolin-4-yl)urea, 4{13,60}:**

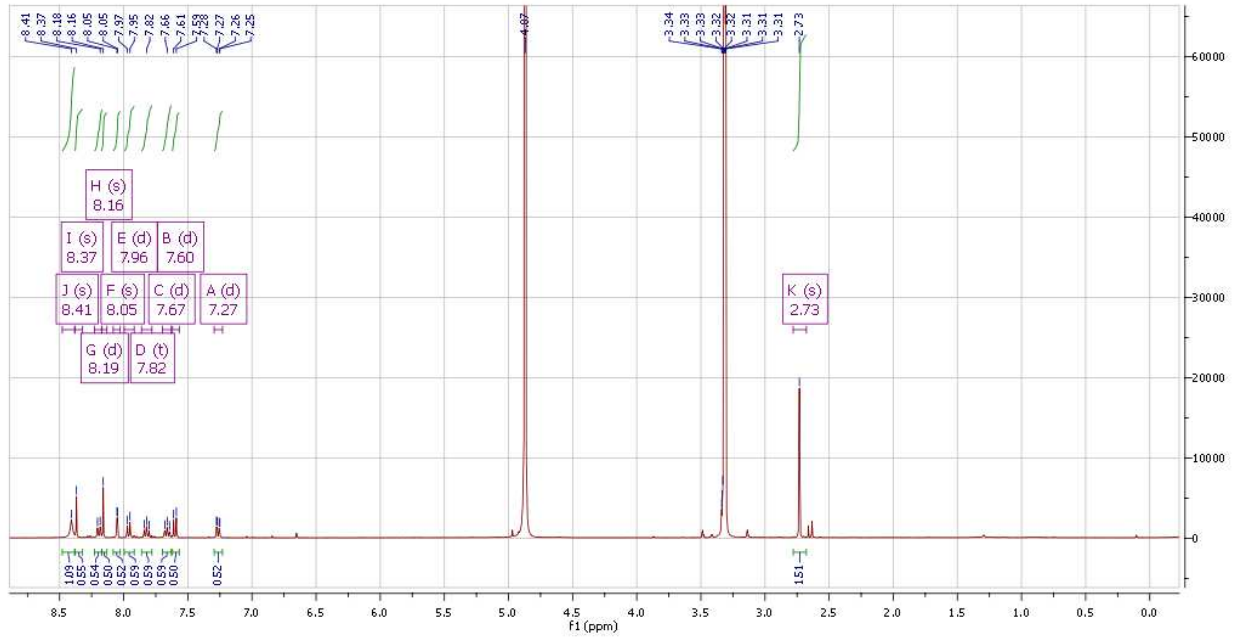

2: UV Detector: TIC Smooth (Mn, 20x2)

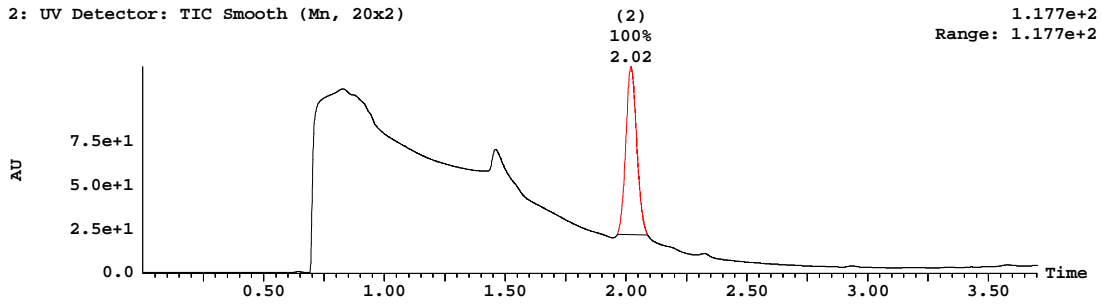

Peak ID 3 Compound Time 2.11 Mass Found

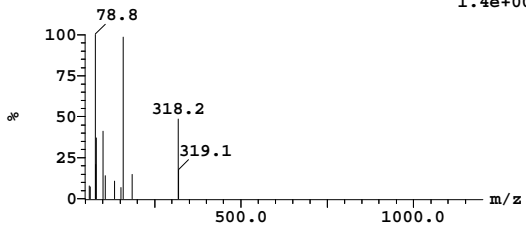

1:MS ES+  
1.4e+008

Peak ID 4 Compound Time 2.15 Mass Found

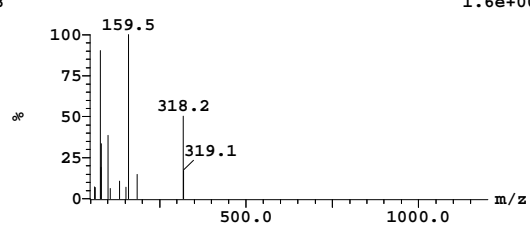

1:MS ES+  
1.6e+008

**1-(5-Chloro-2-methoxyphenyl)-3-(1H-imidazol-2-yl)urea, 4{19,1}:**

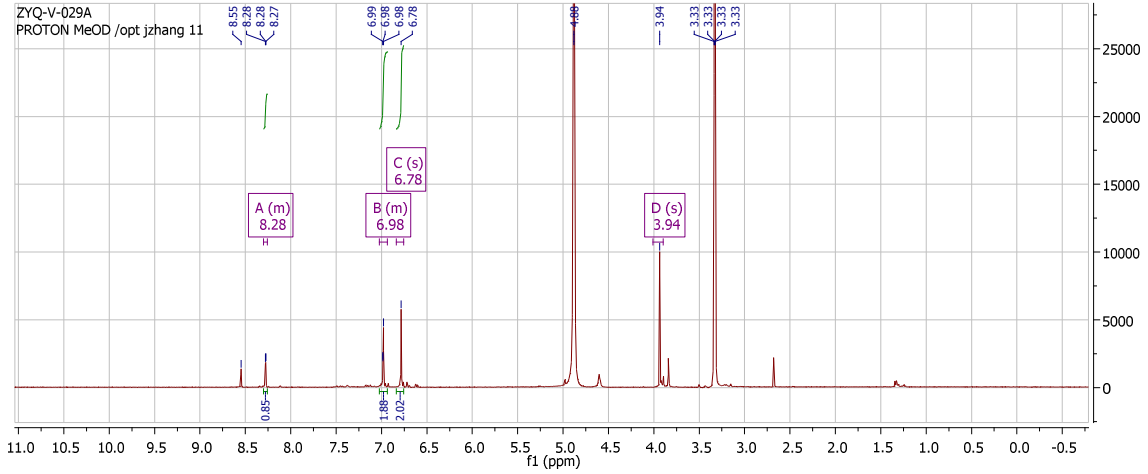

**Sample Report:**

Sample 33 File MLUC013\_A2\_pure

2: UV Detector: TIC Smooth (Mn, 20x2)

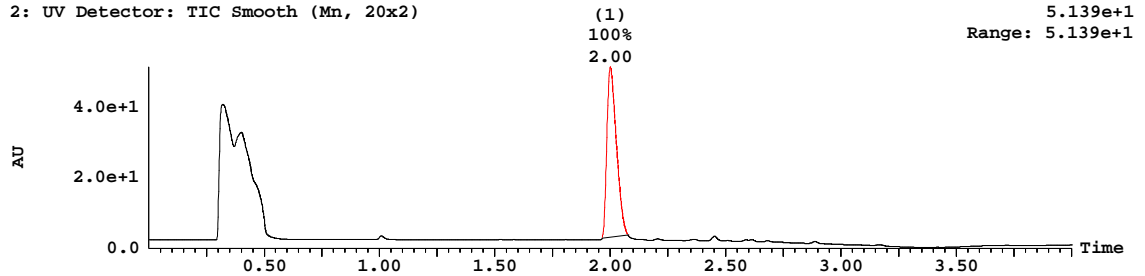

| Peak ID | Compound | Time | Mass Found |
|---------|----------|------|------------|
| 1       |          | 2.00 |            |

| Peak ID | Compound | Time | Mass Found |
|---------|----------|------|------------|
| 1       |          | 2.00 |            |

1: (Time: 2.00) Combine (2401)

2: UV Detector  
1.411 AU

1: MS ES+  
6.2e+007

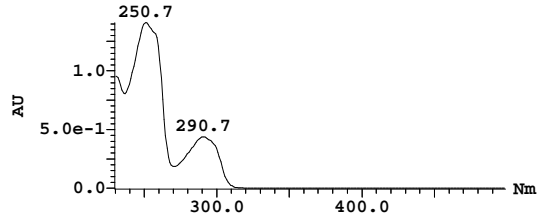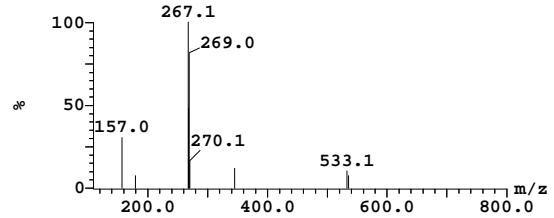

# 1-(3-Chloro-4-methylphenyl)-3-(1H-imidazol-2-yl)urea, 4{19,2}:

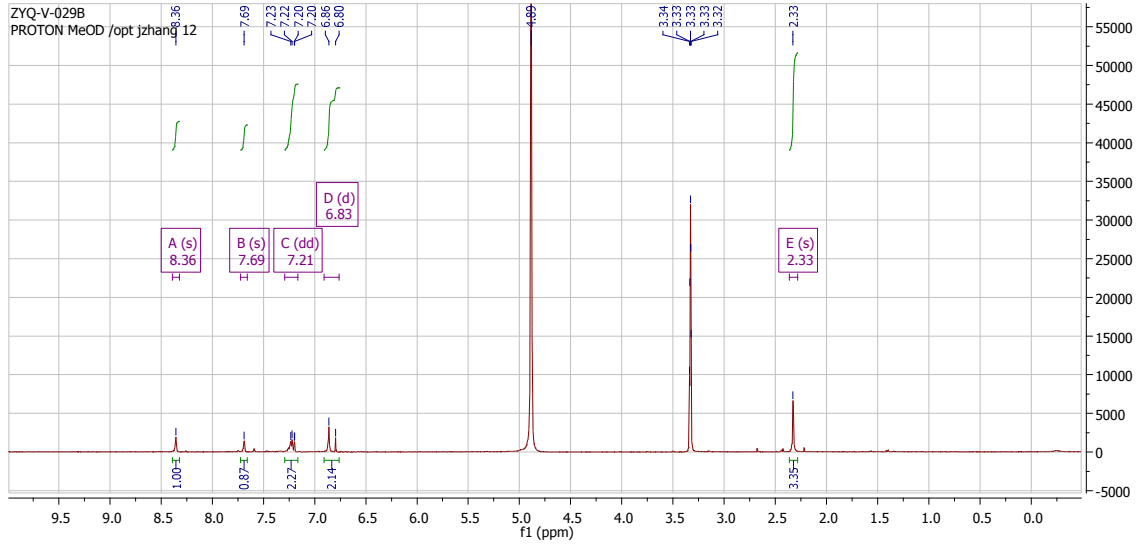

## Sample Report:

Sample 9 File MLUC005\_C2\_pure

2: UV Detector: TIC Smooth (Mn, 20x2)

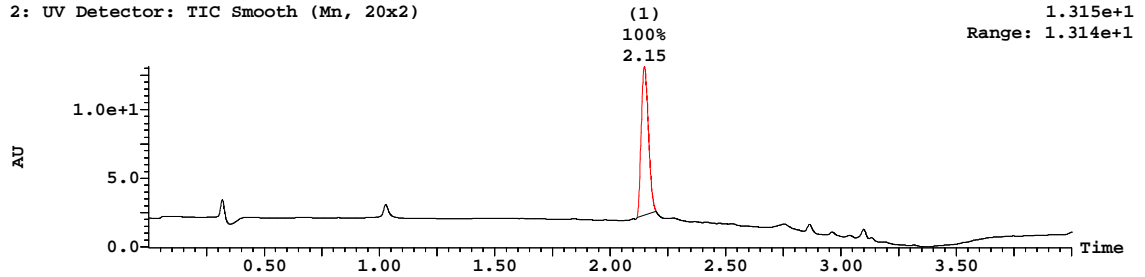

| Peak ID | Compound | Time | Mass Found |
|---------|----------|------|------------|
| 1       |          | 2.15 |            |

1:(Time: 2.15) Combine (2578)

2:UV Detector  
3.975e-1 AU

| Peak ID | Compound | Time | Mass Found |
|---------|----------|------|------------|
| 1       |          | 2.15 |            |

1:MS ES+  
2.2e+006

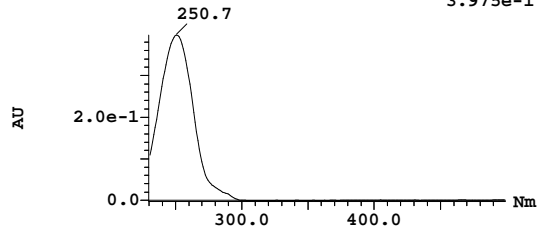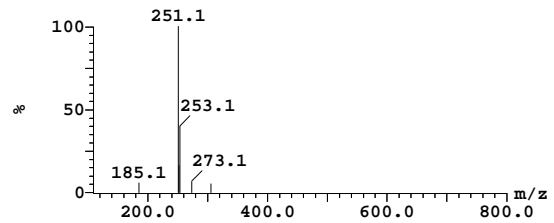

**1-(3-Chloro-4-methoxyphenyl)-3-(1H-imidazol-2-yl)urea, 4{19,3}**:

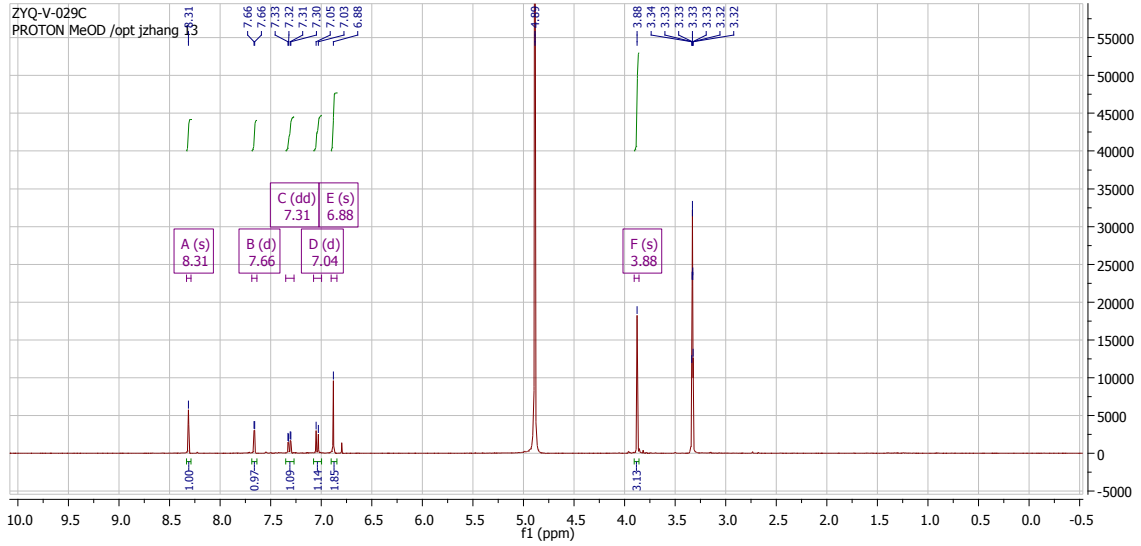

**Sample Report:**

Sample 35 File MLUC013\_B2\_pure

2: UV Detector: TIC Smooth (Mn, 20x2)

(1)  
100%  
1.81

9.741  
Range: 9.74

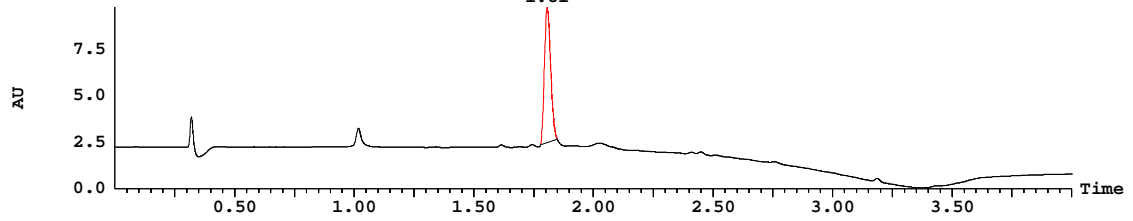

| Peak ID | Compound | Time | Mass Found |
|---------|----------|------|------------|
| 1       |          | 1.81 |            |

| Peak ID | Compound | Time | Mass Found |
|---------|----------|------|------------|
| 1       |          | 1.81 |            |

1: (Time: 1.81) Combine (2169)

2: UV Detector  
2.348e-1 AU

1: MS ES+  
2.4e+007

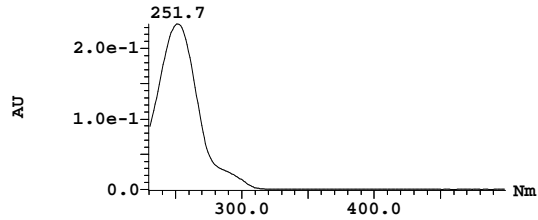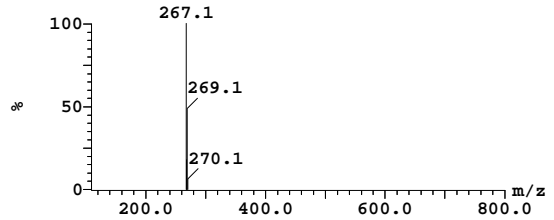

**1-(4-Ethylphenyl)-3-(1H-imidazol-2-yl)urea, 4{19,4}:**

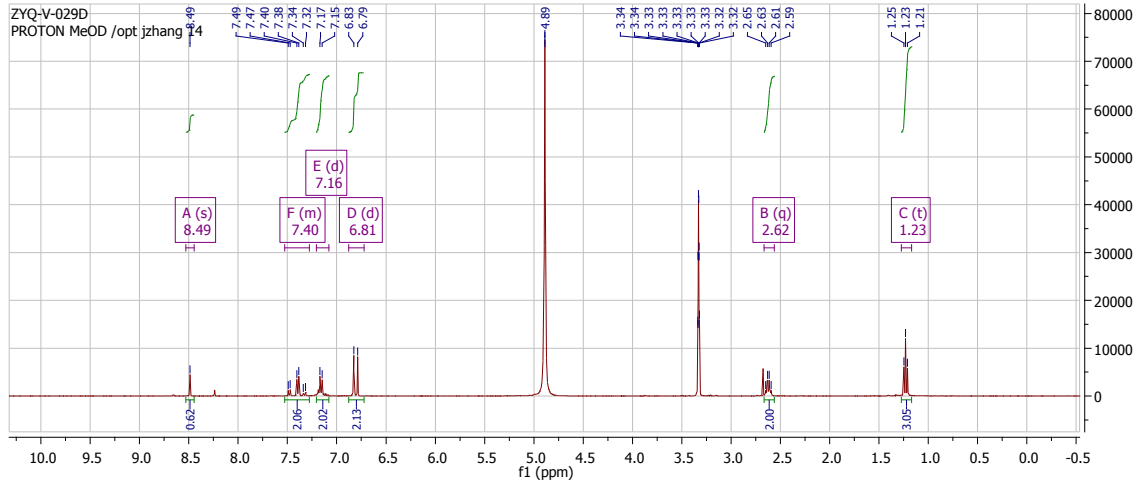

**Sample Report:**

Sample 21 File MLUC005\_F2\_pure

2: UV Detector: TIC Smooth (Mn, 20x2)

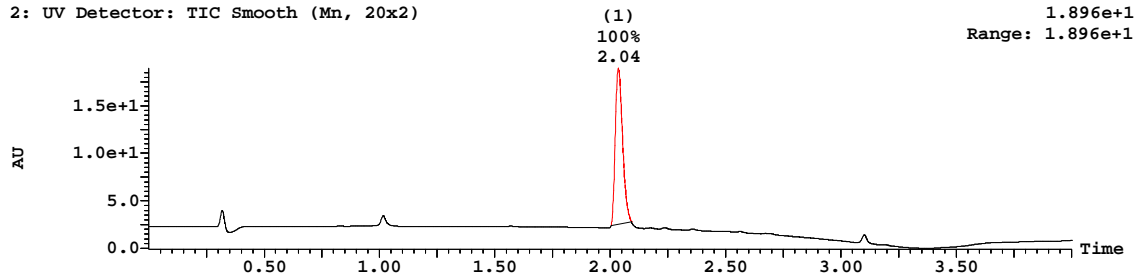

| Peak ID | Compound | Time | Mass Found |
|---------|----------|------|------------|
| 1       |          | 2.04 |            |

1: (Time: 2.04) Combine (2443)

2: UV Detector  
5.676e-1 AU

| Peak ID | Compound | Time | Mass Found |
|---------|----------|------|------------|
| 1       |          | 2.04 |            |

1: MS ES+  
4.7e+007

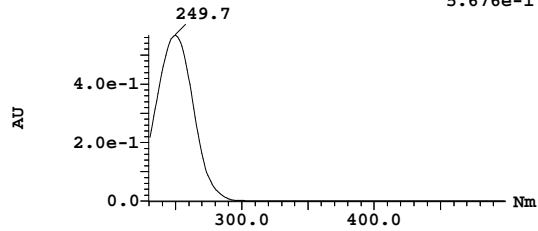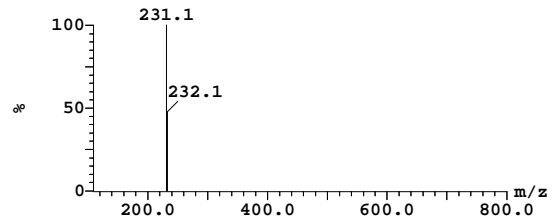

**1-(3,4-Dichlorophenyl)-3-(1H-imidazol-2-yl)urea, 4{19,8}:**

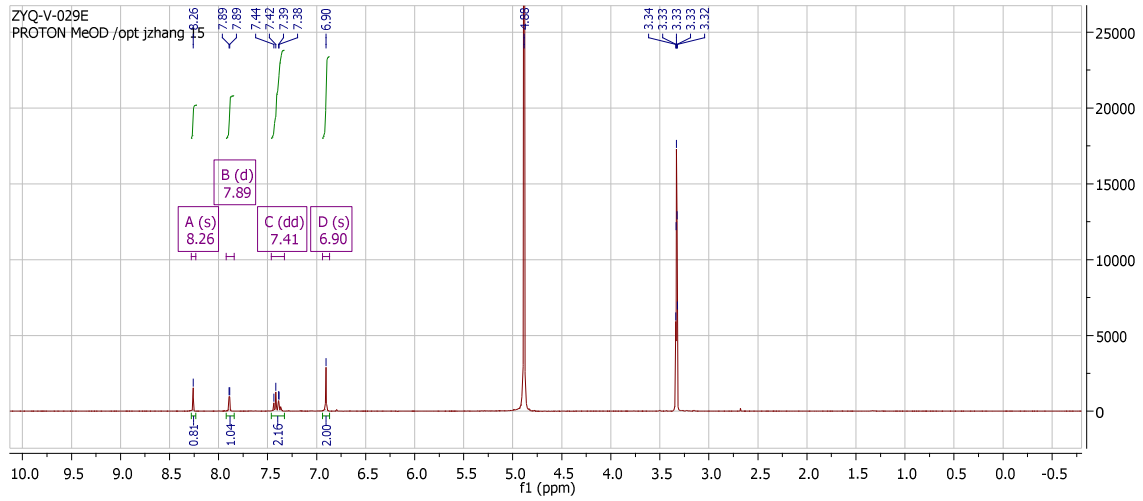

**Sample Report:**

Sample 26 File MLUC005\_G2\_pure

2: UV Detector: TIC Smooth (Mn, 20x2)

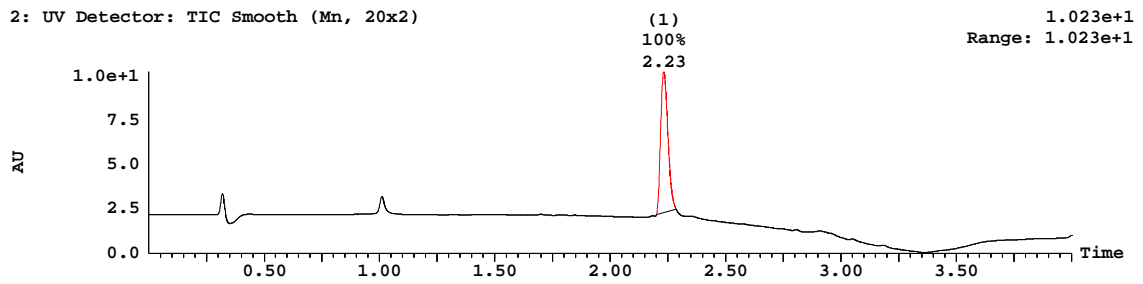

| Peak ID | Compound | Time | Mass Found |
|---------|----------|------|------------|
| 1       | 1        | 2.23 |            |

1: (Time: 2.23) Combine (2679)      2: UV Detector  
2.964e-1 AU

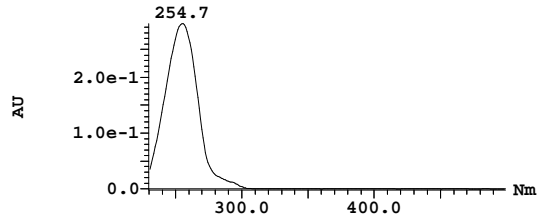

| Peak ID | Compound | Time | Mass Found |
|---------|----------|------|------------|
| 1       | 1        | 2.23 |            |

1: MS ES+  
3.4e+007

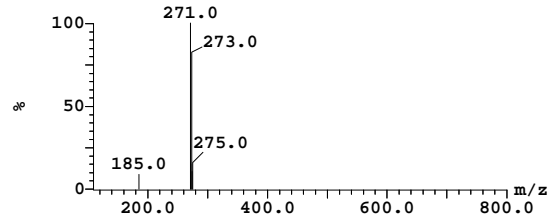

**1-(2,4-Dichlorophenyl)-3-(1H-imidazol-2-yl)urea, 4{19,9}:**

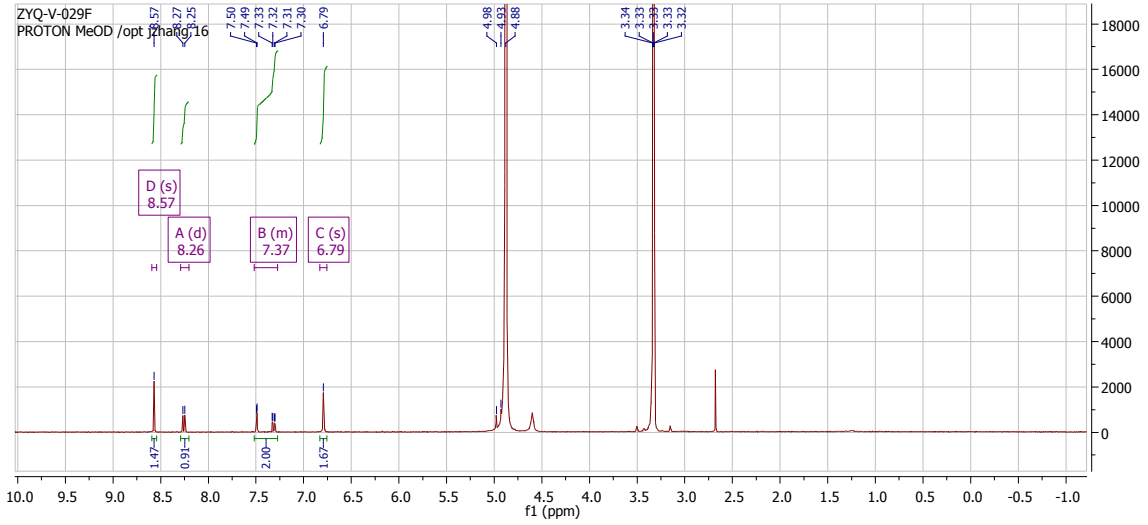

**Sample Report:**

Sample 16 File MLUC005\_E2\_pure

2: UV Detector: TIC Smooth (Mn, 20x2)

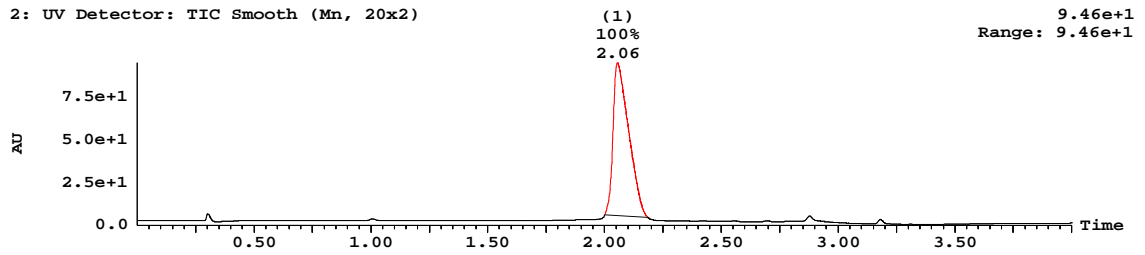

| Peak ID | Compound | Time | Mass Found |
|---------|----------|------|------------|
| 1       |          | 2.06 |            |

1: (Time: 2.06) Combine (2468)

2: UV Detector  
2.693 AU

| Peak ID | Compound | Time | Mass Found |
|---------|----------|------|------------|
| 1       |          | 2.06 |            |

1: MS ES+  
1.0e+005

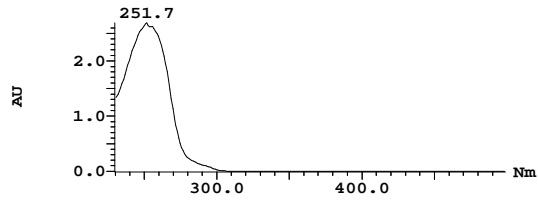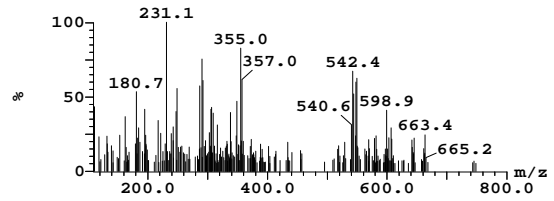

Supplement: ml100083c_si_001.pdf [file ml100083c_si_001.pdf]
